# Supplementary material for: Atom-economic metal free mediated difunctionalization of isocyanides with 3-methyleneoxindoles and 3-methylene-benzofuranones
Source: Royal Society of Chemistry journal article supplement (doi:10.1039/d4qo01369g), 2024-01-01

**Atom-economic metal free mediated difunctionalization of isocyanides with 3-methyleneoxindoles and 3-methylenebenofuranones**

Lvli Chen, Dong Xiong, Zeyu Yang, Yuyao Chen, Jian Xiao,\* Yin Tian\* and Jianfeng Zheng\*

## Contents

|                                                                                                        |    |
|--------------------------------------------------------------------------------------------------------|----|
| 1. General information .....                                                                           | 3  |
| 2. Preparing of 3-methyleneoxindoles <b>2</b> .....                                                    | 4  |
| 3. Optimization of reaction conditions.....                                                            | 7  |
| 4. Catalytic enantioselective variant .....                                                            | 8  |
| 5. General procedure and spectral data of products <b>3</b> .....                                      | 13 |
| 6. General procedure and spectral data of products <b>5</b> .....                                      | 23 |
| 7. Experimental procedure for the scale-up reaction and transformation of the product <b>3aa</b> ..... | 26 |
| 8. Quantum chemical calculations. ....                                                                 | 28 |
| 9. References.....                                                                                     | 50 |
| 10. X-ray crystallographic data.....                                                                   | 51 |
| 11. Copy of NMR spectra .....                                                                          | 54 |

## 1. General Information

Reactions were carried out using commercial reagents in over-dried apparatus.  $^1\text{H}$  NMR spectra were recorded on commercial instruments (400 MHz and 600 MHz). Chemical shifts are recorded in ppm relative to tetramethylsilane and with the solvent resonance as the internal standard ( $\text{CDCl}_3$ ,  $\delta = 7.26$  ppm;  $\text{DMSO}-d_6$ ,  $\delta = 2.50$  ppm). Spectra are reported as follows: chemical shift, multiplicity (s = singlet, d = doublet, t = triplet, m = multiplet), coupling constants (Hz), integration and assignment.  $^{13}\text{C}$  NMR data were collected on commercial instruments (101 MHz and 151 MHz) with complete proton decoupling. Chemical shifts are reported in ppm from the tetramethylsilane with the solvent resonance as internal standard ( $\text{CDCl}_3$ ,  $\delta = 77.0$ ;  $\text{DMSO}-d_6$ ,  $\delta = 39.5$  ppm).  $^{19}\text{F}$  NMR data were collected on commercial instruments (565 MHz) with complete proton decoupling. Melting points (m.p.) were measured on the electrothermal digital melting point apparatus. HRMS was recorded on a commercial apparatus (ESI source). All isocyanides **1**,<sup>1</sup> 3-methyleneoxindoles **2**<sup>2</sup> and 3-methylene-benofuranones **4**<sup>3</sup> were prepared according to the literature.

## 2. Preparing of 3-methyleneoxindoles **2**.

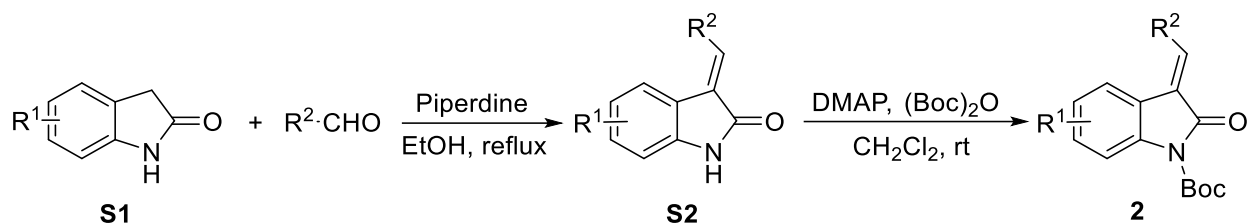

**S1 to S2:** The aldehyde (1.2 equiv.) was added to a solution of **S1** (1.0 equiv., 133 mg) in EtOH (5 mL), finally piperidine (10 mol%) was added. The reaction was refluxed for 24 h, then it was cooled to room temperature and the solvent was removed under reduced pressure. The product **S2** was purified by flash chromatography on silica gel (petroleum ether/ethyl acetate = 4/1).

**S2 to 2:** The **S2** was dissolved in CH<sub>2</sub>Cl<sub>2</sub> (5 mL), and DMAP (5 mol%) was added. Then (Boc)<sub>2</sub>O (1.1 equiv.) was added. The reaction mixture was stirred at room temperature for 1 h. After the reaction was completed, the solvent was removed under reduced pressure and the product **2** was purified by flash chromatography on silica gel (petroleum ether/ethyl acetate = 30/1).

3-methyleneoxindoles **2a**,<sup>2b</sup> **2b**,<sup>2b</sup> **2h**,<sup>2a</sup> **2i**,<sup>2d</sup> **2l**,<sup>2e</sup> **2m**,<sup>2c</sup> **2o**<sup>2a</sup> and **2p**<sup>2a</sup> are known compounds.

### Tert-butyl (*E*)-5-bromo-3-(2,2-dimethylpropylidene)-2-oxindoline-1-carboxylate **2c**

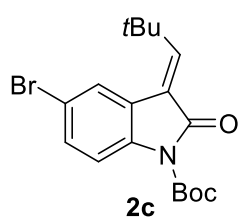

White solid.  $R_f = 0.4$  (PE:EA = 30:1), m.p. 60–62 °C.

<sup>1</sup>H NMR (400 MHz, CDCl<sub>3</sub>)  $\delta$  7.87–7.79 (m, 2H), 7.42 (dt,  $J = 8.8, 2.0$  Hz, 1H), 7.27 (d,  $J = 1.8$  Hz, 1H), 1.62 (s, 9H), 1.37 (s, 9H).

<sup>13</sup>C NMR (101 MHz, CDCl<sub>3</sub>)  $\delta$  166.1, 156.0, 149.1, 139.0, 131.6, 128.7, 124.6, 122.8, 116.7, 116.5, 84.3, 32.9, 29.1, 28.0.

HRMS (ESI–TOF) calcd for C<sub>18</sub>H<sub>22</sub>BrNNaO<sub>3</sub><sup>+</sup> ( $[M+Na^+]$ ) = 402.0675, Found 402.0671.

### Tert-butyl (*E*)-3-(2,2-dimethylpropylidene)-5-methyl-2-oxindoline-1-carboxylate **2d**

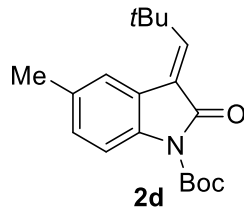

White solid.  $R_f = 0.4$  (PE:EA = 30:1), m.p. 62–64 °C.

<sup>1</sup>H NMR (400 MHz, CDCl<sub>3</sub>)  $\delta$  7.87 (d,  $J = 8.4$  Hz, 1H), 7.58 (d,  $J = 1.8$  Hz, 1H), 7.26 (s, 1H), 7.16 (dd,  $J = 8.3, 1.8$  Hz, 1H), 2.43 (s, 3H), 1.69 (s, 9H), 1.44 (s, 9H).

<sup>13</sup>C NMR (101 MHz, CDCl<sub>3</sub>)  $\delta$  167.1, 153.8, 149.4, 137.9, 132.9, 129.5, 126.6, 125.7, 121.0, 114.7, 83.7, 32.6, 29.1, 28.1, 21.2.

HRMS (ESI–TOF) calcd for C<sub>19</sub>H<sub>25</sub>NNaO<sub>3</sub><sup>+</sup> ( $[M+Na^+]$ ) = 338.1727, Found 338.1722.

### Tert-butyl (*E*)-6-chloro-3-(2,2-dimethylpropylidene)-2-oxindoline-1-carboxylate **2e**

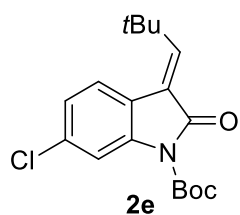

White solid.  $R_f = 0.4$  (PE:EA = 30:1), m.p. 105–107 °C.

$^1\text{H NMR}$  (400 MHz,  $\text{CDCl}_3$ )  $\delta$  8.03 (d,  $J = 2.1$  Hz, 1H), 7.65 (dd,  $J = 8.4, 2.0$  Hz, 1H), 7.25 (s, 1H), 7.16 (dt,  $J = 8.3, 2.1$  Hz, 1H), 1.65 (s, 9H), 1.38 (s, 9H).

$^{13}\text{C NMR}$  (101 MHz,  $\text{CDCl}_3$ )  $\delta$  166.6, 154.8, 149.1, 140.9, 135.0, 126.6, 124.7, 123.7, 119.4, 115.7, 84.5, 32.8, 29.1, 28.0.

HRMS (ESI-TOF) calcd for  $\text{C}_{18}\text{H}_{22}\text{ClNNaO}_3^+$  ( $[\text{M}+\text{Na}^+]$ ) = 358.1180, Found 358.1178.

### Tert-butyl (*E*)-6-bromo-3-(2,2-dimethylpropylidene)-2-oxindoline-1-carboxylate **2f**

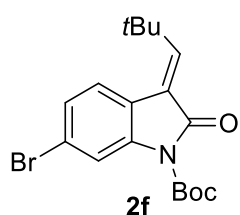

White solid.  $R_f = 0.4$  (PE:EA = 30:1), m.p. 128–129 °C.

$^1\text{H NMR}$  (400 MHz,  $\text{CDCl}_3$ )  $\delta$  8.20 (d,  $J = 1.8$  Hz, 1H), 7.60 (d,  $J = 8.3$  Hz, 1H), 7.33 (dt,  $J = 8.3, 1.3$  Hz, 1H), 7.28 (s, 1H), 1.66 (s, 9H), 1.39 (s, 9H).

$^{13}\text{C NMR}$  (101 MHz,  $\text{CDCl}_3$ )  $\delta$  166.5, 155.1, 149.1, 141.0, 126.9, 126.7, 124.8, 123.1, 119.9, 118.5, 84.5, 32.9, 29.1, 28.1.

HRMS (ESI-TOF) calcd for  $\text{C}_{18}\text{H}_{22}\text{BrNNaO}_3^+$  ( $[\text{M}+\text{Na}^+]$ ) = 402.0675, Found 402.0673.

### Tert-butyl (*E*)-7-bromo-3-(2,2-dimethylpropylidene)-2-oxindoline-1-carboxylate **2g**

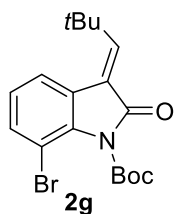

White solid.  $R_f = 0.4$  (PE:EA = 30:1), m.p. 51–52 °C.

$^1\text{H NMR}$  (400 MHz,  $\text{CDCl}_3$ )  $\delta$  7.67 (d,  $J = 7.7$  Hz, 1H), 7.46 (d,  $J = 8.2$  Hz, 1H), 7.25 (s, 1H), 7.02 (t,  $J = 8.0$  Hz, 1H), 1.64 (s, 9H), 1.37 (s, 9H).

$^{13}\text{C NMR}$  (101 MHz,  $\text{CDCl}_3$ )  $\delta$  167.6, 156.0, 148.3, 139.1, 133.6, 125.4, 125.1, 124.5, 124.2, 106.9, 85.2, 32.9, 29.1, 27.7.

HRMS (ESI-TOF) calcd for  $\text{C}_{18}\text{H}_{23}\text{BrNO}_3^+$  ( $[\text{M}+\text{H}^+]$ ) = 380.0856, Found 380.0854.

### 2,2,2-trichloroethyl (*E*)-3-(2,2-dimethylpropylidene)-2-oxindoline-1-carboxylate **2j**

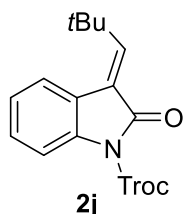

White solid.  $R_f = 0.4$  (PE:EA = 30:1), m.p. 77–78 °C.

$^1\text{H NMR}$  (400 MHz,  $\text{CDCl}_3$ )  $\delta$  8.07 (dd,  $J = 8.2, 2.1$  Hz, 1H), 7.80 (dd,  $J = 7.3, 2.0$  Hz, 1H), 7.40 – 7.31 (m, 2H), 7.27 – 7.21 (m, 1H), 5.05 (s, 2H), 1.41 (s, 9H).

$^{13}\text{C NMR}$  (101 MHz,  $\text{CDCl}_3$ )  $\delta$  166.3, 155.4, 149.4, 138.9, 129.2, 126.2, 124.9, 124.4, 121.3, 115.3, 94.2, 75.6, 32.8, 29.0.

HRMS (ESI-TOF) calcd for  $\text{C}_{16}\text{H}_{17}\text{Cl}_3\text{NO}_3^+$  ( $[\text{M}+\text{H}^+]$ ) = 376.0269, Found 376.0268.

### Benzyl (*E*)-3-(2,2-dimethylpropylidene)-2-oxindoline-1-carboxylate **2k**

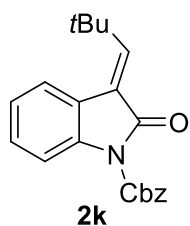

Yellow solid.  $R_f = 0.4$  (PE:EA = 30:1), m.p. 89–91 °C.

$^1\text{H}$  NMR (400 MHz,  $\text{CDCl}_3$ )  $\delta$  8.03 (d,  $J = 8.2$  Hz, 1H), 7.76 (d,  $J = 7.8$  Hz, 1H), 7.54 (d,  $J = 7.2$  Hz, 2H), 7.43 – 7.36 (m, 2H), 7.36 – 7.31 (m, 2H), 7.31 – 7.28 (m, 1H), 7.19 (dt,  $J = 7.7, 1.2$  Hz, 1H), 5.47 (s, 2H), 1.41 (s, 9H).

$^{13}\text{C}$  NMR (101 MHz,  $\text{CDCl}_3$ )  $\delta$  166.6, 154.6, 150.8, 139.6, 135.1, 129.0, 128.5, 128.2, 127.8, 126.0, 125.2, 123.9, 121.0, 115.1, 68.3, 32.7, 29.0.

HRMS (ESI-TOF) calcd for  $\text{C}_{21}\text{H}_{22}\text{NO}_3^+$  ( $[\text{M}+\text{H}^+]$ ) = 336.1594, Found 336.1597.

***E*-3-(2,2-dimethylpropylidene)-1-(phenylsulfonyl)indolin-2-one 2n**

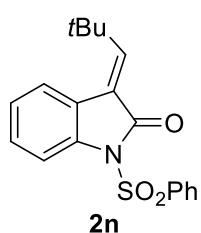

Yellow solid.  $R_f = 0.4$  (PE:EA = 30:1), m.p. 75.2–76.9 °C.

$^1\text{H}$  NMR (400 MHz,  $\text{CDCl}_3$ )  $\delta$  8.14 – 8.06 (m, 2H), 8.03 (dd,  $J = 8.1, 2.1$  Hz, 1H), 7.70 (d,  $J = 7.9$  Hz, 1H), 7.64 – 7.56 (m, 1H), 7.50 (td,  $J = 7.9, 2.4$  Hz, 2H), 7.37 – 7.30 (m, 1H), 7.20 – 7.15 (m, 1H), 7.14 (d,  $J = 2.2$  Hz, 1H), 1.32 (s, 9H).

$^{13}\text{C}$  NMR (101 MHz,  $\text{CDCl}_3$ )  $\delta$  166.9, 155.6, 139.3, 138.6, 134.2, 129.4, 129.0, 127.9, 126.5, 124.6, 124.1, 121.1, 113.6, 77.3, 77.0, 76.7, 32.9, 28.9.

HRMS (ESI-TOF) calcd for  $\text{C}_{19}\text{H}_{20}\text{NO}_3\text{S}^+$  ( $[\text{M}+\text{H}^+]$ ) = 342.1158, Found 342.1157.

### 3. Optimization of the reaction conditions

Table 1 Screening of reaction solvents and temperature

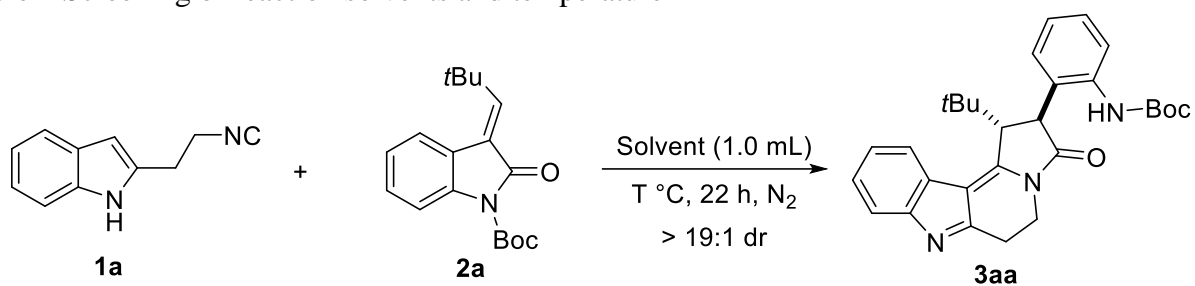

| Entry <sup>a</sup> | Solvent                              | T (°C) | Yield (%) <sup>b</sup> <b>3aa</b> |
|--------------------|--------------------------------------|--------|-----------------------------------|
| 1                  | CH <sub>2</sub> Cl <sub>2</sub>      | 70     | 85                                |
| 2                  | CHCl <sub>3</sub>                    | 70     | 78                                |
| 3                  | ClCH <sub>2</sub> CH <sub>2</sub> Cl | 70     | 92                                |
| 4                  | THF                                  | 70     | 30                                |
| 5                  | Toluene                              | 70     | 31                                |
| 6                  | EtOAc                                | 70     | 47                                |
| 7                  | Et <sub>2</sub> O                    | 70     | 37                                |
| 8                  | CH <sub>3</sub> CN                   | 70     | 64                                |
| 9                  | EtOH                                 | 70     | 21                                |
| 10                 | MeOH                                 | 70     | 0                                 |
| 11                 | ClCH <sub>2</sub> CH <sub>2</sub> Cl | rt     | 36                                |
| 12                 | ClCH <sub>2</sub> CH <sub>2</sub> Cl | 40     | 61                                |
| 13 <sup>c</sup>    | ClCH <sub>2</sub> CH <sub>2</sub> Cl | 70     | 72                                |

<sup>a</sup>Unless otherwise noted, the reactions were performed **1a** (0.10 mmol) and **2a** (0.10 mmol) in indicated solvent (1.0 mL) and indicated temperature in sealed tube under N<sub>2</sub> for 22 h. <sup>b</sup>The yield of isolated product for **3aa**. <sup>c</sup>with ClCH<sub>2</sub>CH<sub>2</sub>Cl (0.5 mL).

#### 4. Catalytic enantioselective variant

Table 2 Screening of the metal salts

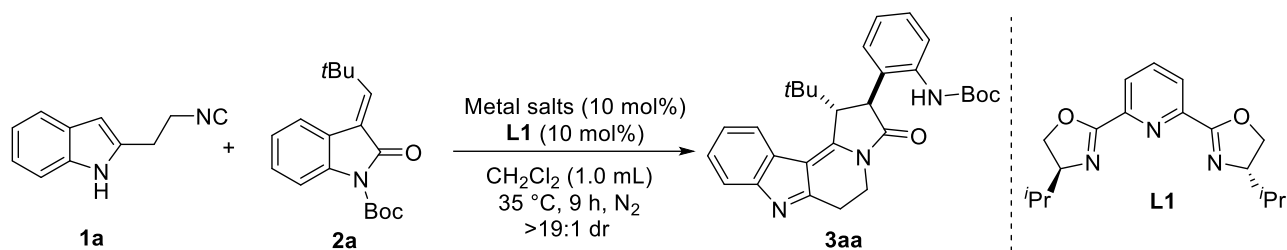

| Entry <sup>a</sup> | Metal salts          | Yield (%) <sup>b</sup> <b>3aa</b> | <i>ee</i> <sup>c</sup> ( <b>3aa</b> ) |
|--------------------|----------------------|-----------------------------------|---------------------------------------|
| 1                  | Ni(OTf) <sub>2</sub> | 0                                 | n.d.                                  |
| 2                  | Al(OTf) <sub>3</sub> | 60                                | 0                                     |
| 3                  | Fe(OTf) <sub>3</sub> | 43                                | 0                                     |
| 4                  | Zn(OTf) <sub>2</sub> | 56                                | 0                                     |
| 5                  | Cu(OTf) <sub>2</sub> | 56                                | 0                                     |
| 6                  | Al(OTf) <sub>3</sub> | 31                                | 0                                     |
| 7                  | Mg(OTf) <sub>2</sub> | 52                                | 0                                     |
| 8                  | In(OTf) <sub>3</sub> | 55                                | 0                                     |
| 9                  | Sc(OTf) <sub>3</sub> | 37                                | 0                                     |
| 10                 | Y(OTf) <sub>3</sub>  | 89                                | 20                                    |
| 11                 | La(OTf) <sub>3</sub> | 85                                | 70                                    |
| 12                 | Pr(OTf) <sub>3</sub> | 86                                | 60                                    |
| 13                 | Nd(OTf) <sub>3</sub> | 88                                | 44                                    |
| 14                 | Sm(OTf) <sub>3</sub> | 90                                | 40                                    |
| 15                 | Eu(OTf) <sub>3</sub> | 83                                | 20                                    |
| 16                 | Gd(OTf) <sub>3</sub> | 92                                | 26                                    |
| 17                 | Dy(OTf) <sub>3</sub> | 83                                | 24                                    |
| 18                 | Ho(OTf) <sub>3</sub> | 80                                | 28                                    |
| 19                 | Er(OTf) <sub>3</sub> | 74                                | 24                                    |
| 20                 | Tm(OTf) <sub>3</sub> | 88                                | 18                                    |
| 21                 | Yb(OTf) <sub>3</sub> | 85                                | 10                                    |
| 22                 | Lu(OTf) <sub>3</sub> | 93                                | 20                                    |

<sup>a</sup>Unless otherwise noted, the reactions were performed with Lewis acid (10 mol%), **L1** (10 mol%), **1a** (0.10 mmol) and **2a** (0.10 mmol) in CH<sub>2</sub>Cl<sub>2</sub> (1.0 mL) at 35 °C under N<sub>2</sub> for 9 h. <sup>b</sup>The yield of isolated product for **3aa**. <sup>c</sup>*ee* (**3aa**) determined by chiral HPLC analysis. n.d. = not detected.



Table 3 Screening of the chiral ligands

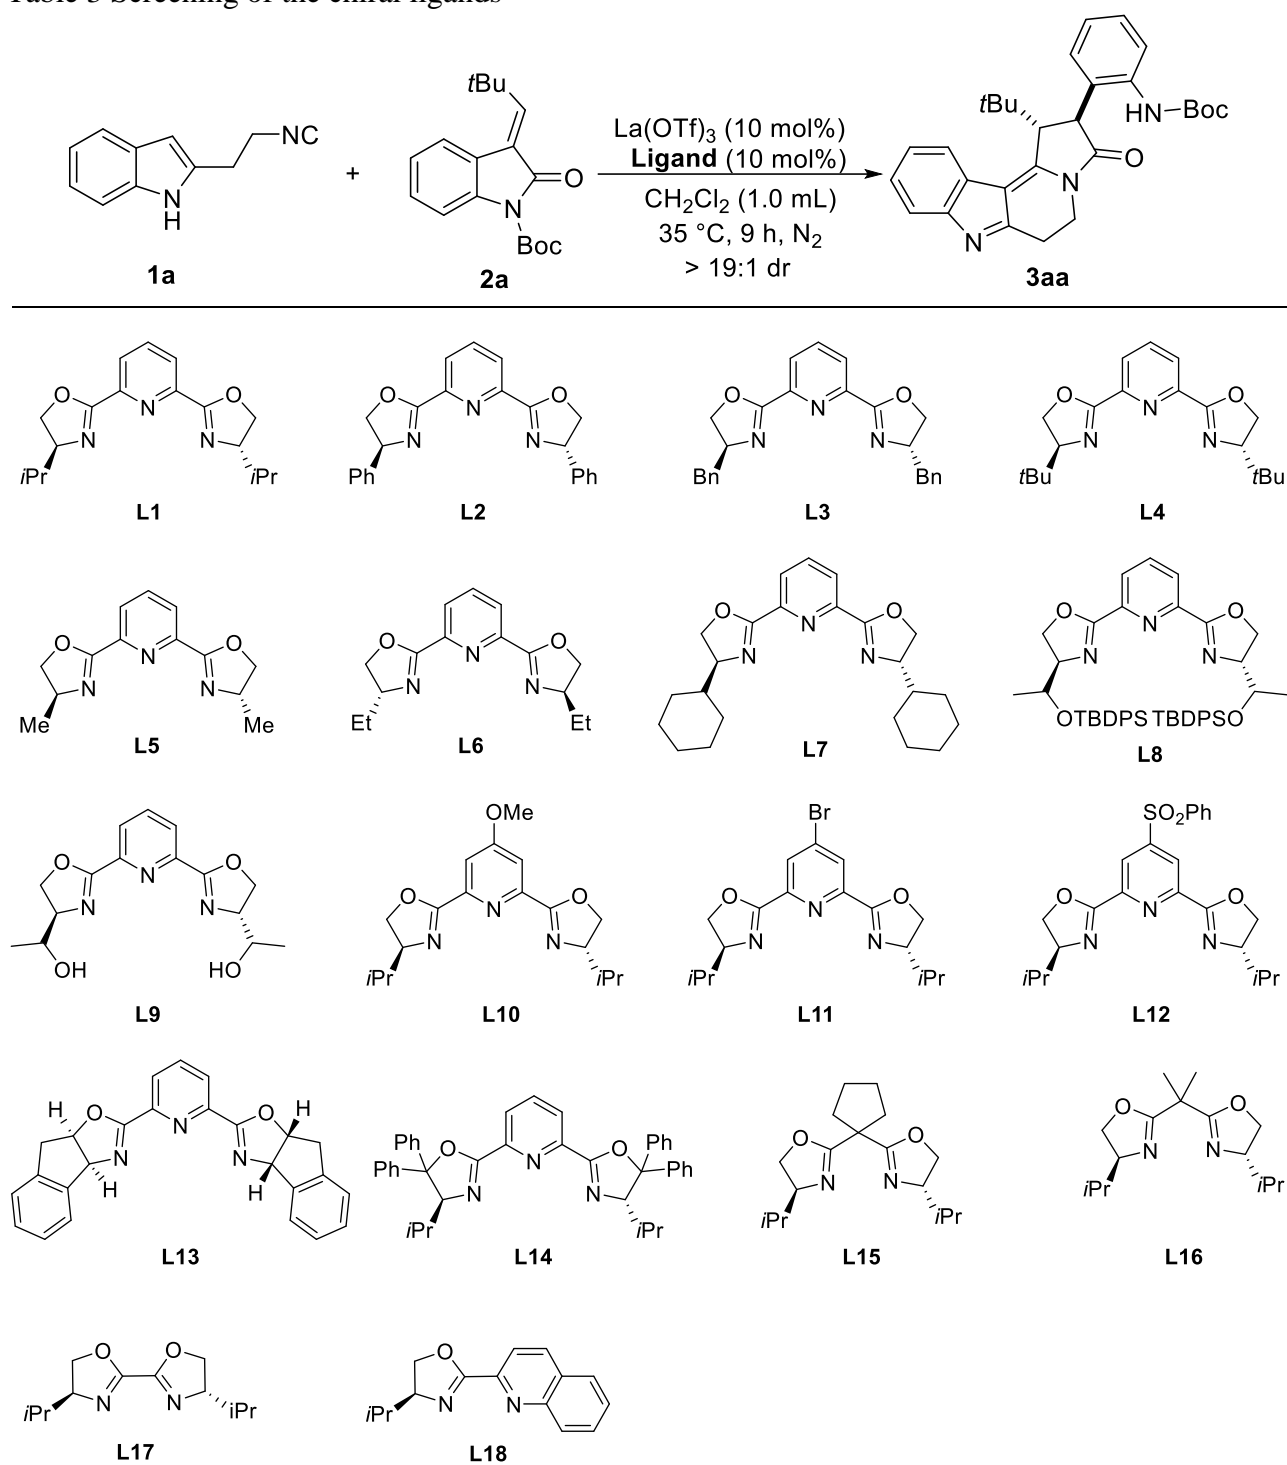

| Entry <sup>a</sup> | Ligand    | Yield (%) <sup>b</sup> <b>3aa</b> | ee <sup>c</sup> ( <b>3aa</b> ) |
|--------------------|-----------|-----------------------------------|--------------------------------|
| 1                  | <b>L1</b> | 85                                | 70                             |
| 2                  | <b>L2</b> | 65                                | 28                             |
| 3                  | <b>L3</b> | 54                                | 37                             |
| 4                  | <b>L4</b> | 86                                | 0                              |
| 5                  | <b>L5</b> | 82                                | 60                             |
| 6                  | <b>L6</b> | 91                                | 42                             |

|    |            |    |    |
|----|------------|----|----|
| 7  | <b>L7</b>  | 87 | 58 |
| 8  | <b>L8</b>  | 90 | 0  |
| 9  | <b>L9</b>  | 87 | 0  |
| 10 | <b>L10</b> | 92 | 67 |
| 11 | <b>L11</b> | 81 | 45 |
| 12 | <b>L12</b> | 82 | 27 |
| 13 | <b>L13</b> | 88 | 30 |
| 14 | <b>L14</b> | 78 | 0  |
| 15 | <b>L15</b> | 75 | 0  |
| 16 | <b>L16</b> | 68 | 0  |
| 17 | <b>L17</b> | 75 | 0  |
| 18 | <b>L18</b> | 82 | 0  |

<sup>a</sup>Unless otherwise noted, the reactions were performed with La(OTf)<sub>3</sub> (10 mol%), **Ligand** (10 mol%), **1a** (0.10 mmol) and **2a** (0.10 mmol) in CH<sub>2</sub>Cl<sub>2</sub> (1.0 mL) at 35 °C under N<sub>2</sub> for 9 h. <sup>b</sup>The yield of isolated product for **3aa**. <sup>c</sup>*ee* (**3aa**) determined by chiral HPLC analysis.

Table 4 Screening of the solvent

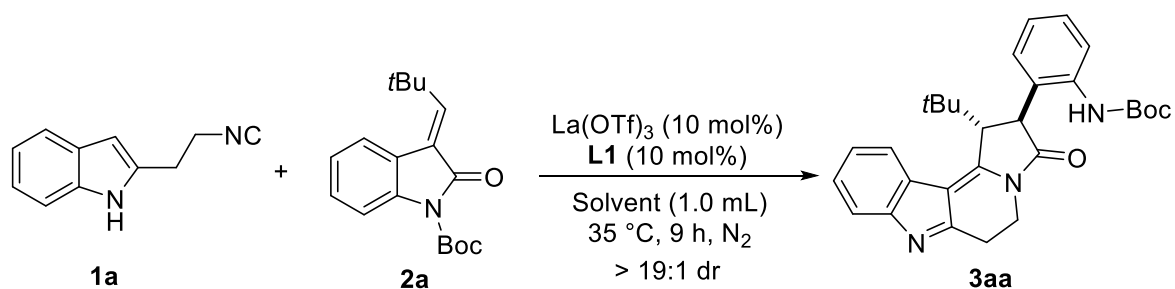

| Entry <sup>a</sup> | Solvent                              | Yield (%) <sup>b</sup> <b>3aa</b> | <i>ee</i> <sup>c</sup> ( <b>3aa</b> ) |
|--------------------|--------------------------------------|-----------------------------------|---------------------------------------|
| 1                  | CH <sub>2</sub> Cl <sub>2</sub>      | 85                                | 70                                    |
| 2                  | ClCH <sub>2</sub> CH <sub>2</sub> Cl | 86                                | 57                                    |
| 3                  | CHCl <sub>3</sub>                    | 88                                | 38                                    |
| 4                  | THF                                  | 70                                | 50                                    |
| 5                  | Toluene                              | 78                                | 45                                    |
| 6                  | CH <sub>3</sub> CN                   | 50                                | 39                                    |
| 7                  | EtOAc                                | 60                                | 38                                    |
| 8                  | MeOH                                 | 0                                 | n.d.                                  |
| 9                  | 1,4-dioxane                          | 0                                 | n.d.                                  |

<sup>a</sup>Unless otherwise noted, the reactions were performed with La(OTf)<sub>3</sub> (10 mol%), **L1** (10 mol%), **1a** (0.10 mmol) and **2a** (0.10 mmol) in indicated solvent (1.0 mL) at 35 °C under N<sub>2</sub> for 9 h. <sup>b</sup>The yield of isolated product for **3aa**. <sup>c</sup>*ee* (**3aa**) determined by chiral HPLC analysis.

Table 5 Screening of the ratio of the substrates

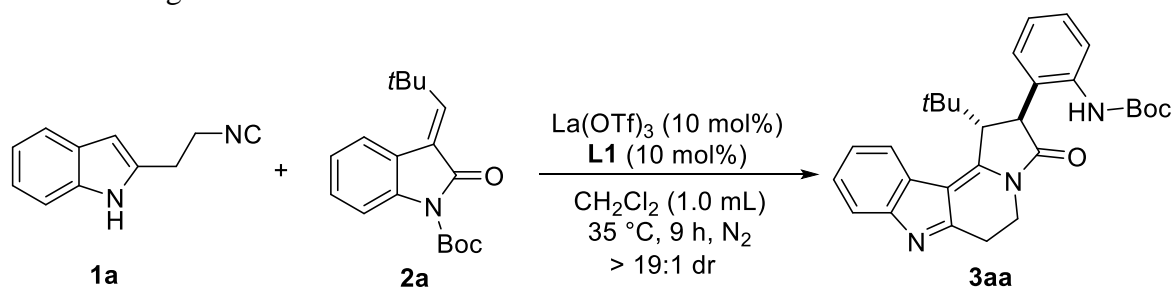

| Entry <sup>a</sup> | <b>1a</b> (x mmol) | <b>2a</b> (y mmol) | Yield (%) <sup>b</sup> <b>3aa</b> | <i>ee</i> <sup>c</sup> ( <b>3aa</b> ) |
|--------------------|--------------------|--------------------|-----------------------------------|---------------------------------------|
| 1                  | 0.1                | 0.1                | 85                                | 70                                    |
| 2                  | 0.15               | 0.1                | 90                                | 74                                    |
| 3                  | 0.2                | 0.1                | 81                                | 67                                    |
| 4                  | 0.1                | 0.15               | 91                                | 61                                    |
| 5                  | 0.1                | 0.2                | 91                                | 49                                    |

<sup>a</sup>Unless otherwise noted, the reactions were performed with La(OTf)<sub>3</sub> (10 mol%), **L1** (10 mol%), **1a** (x mmol) and **2a** (y mmol) in CH<sub>2</sub>Cl<sub>2</sub> (1.0 mL) at 35 °C under N<sub>2</sub> for 9 h. <sup>b</sup>The yield of isolated product for **3aa**. <sup>c</sup>*ee* (**3aa**) determined by chiral HPLC analysis.

Table 6 Screening of the reaction temperature

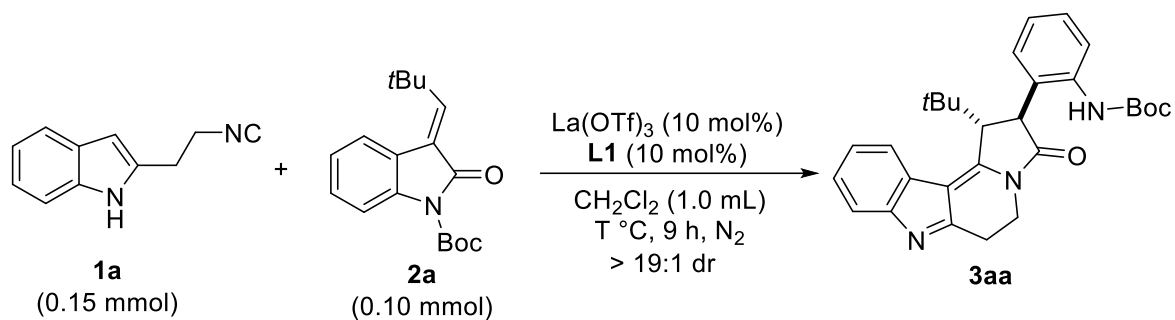

| Entry <sup>a</sup> | T (°C) | Yield (%) <sup>b</sup> <b>3aa</b> | <i>ee</i> <sup>c</sup> ( <b>3aa</b> ) |
|--------------------|--------|-----------------------------------|---------------------------------------|
| 1                  | 50     | 65                                | 60                                    |
| 2                  | 40     | 74                                | 68                                    |
| 3                  | 35     | 90                                | 74                                    |
| 4                  | 30     | 85                                | 70                                    |
| 5                  | rt     | 81                                | 62                                    |
| 6 <sup>d</sup>     | 0      | 51                                | 44                                    |
| 7 <sup>e</sup>     | -10    | 31                                | 14                                    |

<sup>a</sup>Unless otherwise noted, the reactions were performed with La(OTf)<sub>3</sub> (10 mol%), **L1** (10 mol%), **1a** (0.15 mmol) and **2a** (0.10 mmol) in CH<sub>2</sub>Cl<sub>2</sub> (1.0 mL) at indicated temperature under N<sub>2</sub> for 9 h. <sup>b</sup>The yield of isolated product for **3aa**. <sup>c</sup>*ee* (**3aa**) determined by chiral HPLC analysis. <sup>d</sup>with 36 h. <sup>e</sup>with 48 h.

Table 7 Screening of the reaction concentration

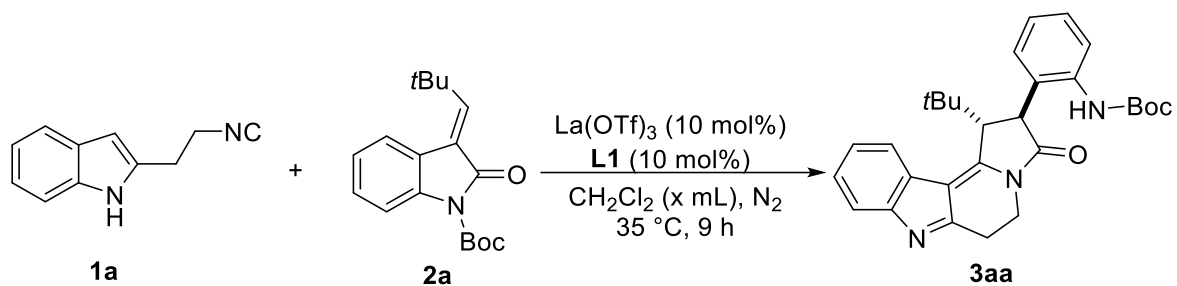

| Entry <sup>a</sup> | $\text{CH}_2\text{Cl}_2$ (x mL) | Yield (%) <sup>b</sup> <b>3aa</b> | <i>ee</i> <sup>c</sup> ( <b>3aa</b> ) |
|--------------------|---------------------------------|-----------------------------------|---------------------------------------|
| 1                  | 0.5                             | 89                                | 54                                    |
| 2                  | 1.0                             | 90                                | 74                                    |
| 3                  | 1.5                             | 96                                | 70                                    |
| 4                  | 2.0                             | 91                                | 67                                    |

<sup>a</sup>Unless otherwise noted, the reactions were performed with  $\text{La}(\text{OTf})_3$  (10 mol%), **L1** (10 mol%), **1a** (0.15 mmol) and **2a** (0.10 mmol) in  $\text{CH}_2\text{Cl}_2$  (x mL) at 35 °C under  $\text{N}_2$  for 9 h. <sup>b</sup>The yield of isolated product for **3aa**. <sup>c</sup>*ee* (**3aa**) determined by chiral HPLC analysis.

## 5. General procedure and spectral data of products 3

A dry sealed tube was charged with isocyanide **1** (0.1 mmol), 3-alkenyl-oxindoles **2** (0.1 mmol), and  $\text{ClCH}_2\text{CH}_2\text{Cl}$  (1.0 mL). The reaction mixture continued stirring at 70 °C under  $\text{N}_2$  for 22 h. The residue was directly purified by flash chromatography on silica gel by using petroleum ether/ethyl acetate = 1/2 as eluent to afford the desired products **3**.

### Tert-butyl(2-(1-(tert-butyl)-3-oxo-2,3,5,6-tetrahydro-1H-indolizino[7,8-b]indol-2-yl)phenyl)carbamate **3aa**

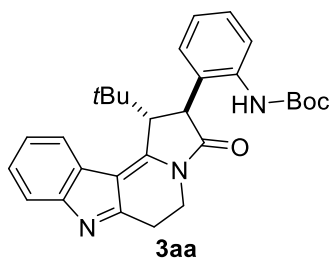

The reaction was run at 70 °C for 22 h, affording product **3aa** in 92% yield (43.4 mg) as a yellow solid.  $R_f = 0.3$  (PE:EA = 1:2), m.p. 110.8–111.5 °C.

$^1\text{H}$  NMR (400 MHz,  $\text{CDCl}_3$ )  $\delta$  7.93 (s, 1H), 7.79 – 7.68 (m, 2H), 7.62 (d,  $J = 7.7$  Hz, 1H), 7.33 (td,  $J = 7.7, 1.2$  Hz, 1H), 7.29 – 7.20 (m, 2H), 7.03 – 6.93 (m, 2H), 4.17 (s, 1H), 4.00 – 3.87 (m, 2H), 3.62 (s, 1H), 3.22 – 3.04 (m, 2H), 1.54 (s, 9H), 1.14 (s, 9H).

$^{13}\text{C}$  NMR (101 MHz,  $\text{CDCl}_3$ )  $\delta$  176.0, 163.4, 155.9, 155.1, 153.8, 137.1, 128.8, 128.6, 128.2, 127.2, 125.4, 125.4, 125.1, 124.1, 121.9, 120.3, 117.9, 80.6, 53.8, 46.5, 38.9, 38.7, 28.4, 28.1, 25.4.

HRMS (ESI-TOF) calcd for  $\text{C}_{29}\text{H}_{34}\text{N}_3\text{O}_3^+$  ( $[\text{M}+\text{H}^+]$ ) = 472.2595, Found 472.2579.

### Tert-butyl(2-(1-(tert-butyl)-10-fluoro-3-oxo-2,3,5,6-tetrahydro-1H-indolizino[7,8-b]indol-2-yl)phenyl)carbamate **3ba**

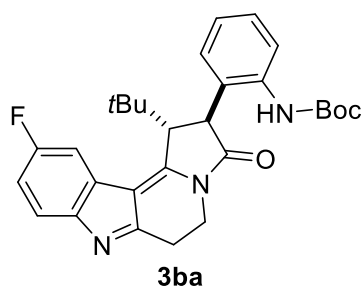

The reaction was run at 70 °C for 22 h, affording product **3ba** in 75% yield (36.8 mg) as a yellow solid.  $R_f = 0.3$  (PE:EA = 1:2), m.p. 118.7–119.2 °C.

$^1\text{H}$  NMR (600 MHz,  $\text{CDCl}_3$ )  $\delta$  7.86 (s, 1H), 7.75 (d,  $J = 8.0$  Hz, 1H), 7.53 (dd,  $J = 8.6, 4.8$  Hz, 1H), 7.39 (dd,  $J = 8.8, 2.5$  Hz, 1H), 7.28 (dd,  $J = 7.6, 1.5$  Hz, 1H), 7.07 – 6.99 (m, 2H), 6.93 (dd,  $J = 8.0, 1.5$  Hz, 1H), 4.18 (s, 1H), 4.01 – 3.87 (m, 2H), 3.56 (s, 1H), 3.18 – 3.06 (m, 2H), 1.53 (s, 9H), 1.14 (s, 9H).

$^{13}\text{C}$  NMR (151 MHz,  $\text{CDCl}_3$ )  $\delta$  176.0, 163.3 (d,  $J = 3.0$  Hz), 161.1 (d,  $J = 241.6$  Hz), 159.5, 156.4, 153.8, 152.0, 137.0, 129.3 (d,  $J = 10.6$  Hz), 128.7, 125.5, 125.4, 125.0, 120.7 (d,  $J = 9.1$  Hz), 117.6, 113.8 (d,  $J = 24.2$  Hz), 108.9 (d,  $J = 25.6$  Hz), 80.7, 53.8, 46.5, 38.9, 38.7, 28.3, 28.0, 25.2.

$^{19}\text{F}$  NMR (565 MHz,  $\text{CDCl}_3$ )  $\delta$  -118.54.

HRMS (ESI-TOF) calcd for  $C_{29}H_{33}FN_3O_3^+$  ( $[M+H]^+$ ) = 490.2500, Found 490.2498.

**Tert-butyl(2-(1-(tert-butyl)-10-chloro-3-oxo-2,3,5,6-tetrahydro-1H-indolizino[7,8-b]indol-2-yl)phenyl)carbamate 3ca**

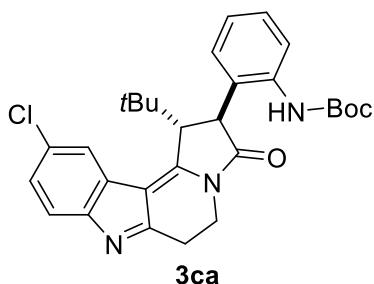

The reaction was run at 70 °C for 22 h, affording product **3ca** in 85% yield (43.1 mg) as a yellow solid.  $R_f$  = 0.3 (PE:EA = 1:2), m.p. 110.6–112.3 °C.

$^1H$  NMR (600 MHz,  $CDCl_3$ )  $\delta$  7.83 (s, 1H), 7.75 (d,  $J$  = 8.2 Hz, 1H), 7.65 (d,  $J$  = 2.0 Hz, 1H), 7.52 (d,  $J$  = 8.4 Hz, 1H), 7.28 (td,  $J$  = 8.5, 1.8 Hz, 2H), 7.03 (td,  $J$  = 7.6, 1.3 Hz, 1H), 6.94 (dd,  $J$  = 8.0, 1.5 Hz,

1H), 4.18 (s, 1H), 4.01 – 3.88 (m, 2H), 3.57 (s, 1H), 3.18 – 3.07 (m, 2H), 1.53 (s, 9H), 1.14 (s, 9H).

$^{13}C$  NMR (151 MHz,  $CDCl_3$ )  $\delta$  176.0, 163.7, 156.8, 154.2, 153.8, 137.0, 129.7, 129.6, 128.7, 128.6, 127.0, 125.6, 125.5, 125.0, 121.7, 121.0, 117.1, 80.7, 53.9, 46.5, 38.8, 38.7, 28.3, 28.0, 25.2.

HRMS (ESI-TOF) calcd for  $C_{29}H_{33}ClN_3O_3^+$  ( $[M+H]^+$ ) = 506.2205, Found 506.2209.

**Tert-butyl(2-(10-bromo-1-(tert-butyl)-3-oxo-2,3,5,6-tetrahydro-1H-indolizino[7,8-b]indol-2-yl)phenyl)carbamate 3da**

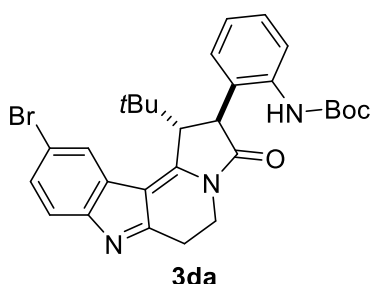

The reaction was run at 70 °C for 22 h, affording product **3da** in 90% yield (49.6 mg) as a yellow solid.  $R_f$  = 0.3 (PE:EA = 1:2), m.p. 120.3–121.3 °C.

$^1H$  NMR (600 MHz,  $CDCl_3$ )  $\delta$  7.92 – 7.66 (m, 3H), 7.53 – 7.38 (m, 2H), 7.28 (td,  $J$  = 7.7, 1.5 Hz, 1H), 7.04 (td,  $J$  = 7.6, 1.3 Hz, 1H), 6.94 (d,  $J$  = 7.8 Hz, 1H), 4.18 (s, 1H), 4.00 – 3.88 (m, 2H), 3.57 (s, 1H),

3.17 – 3.07 (m, 2H), 1.53 (s, 9H), 1.13 (s, 9H).

$^{13}C$  NMR (101 MHz,  $CDCl_3$ )  $\delta$  175.3, 163.3, 155.8, 153.8, 153.5, 136.3, 131.6, 130.6, 128.3, 128.0, 127.3, 126.7, 124.2, 121.8, 120.3, 118.3, 117.9, 81.0, 53.3, 46.3, 38.9, 38.8, 28.2, 28.0, 25.2.

HRMS (ESI-TOF) calcd for  $C_{29}H_{33}BrN_3O_3^+$  ( $[M+H]^+$ ) = 550.1700, Found 550.1700.

**Tert-butyl(2-(1-(tert-butyl)-10-methyl-3-oxo-2,3,5,6-tetrahydro-1H-indolizino[7,8-b]indol-2-yl)phenyl)carbamate 3ea**

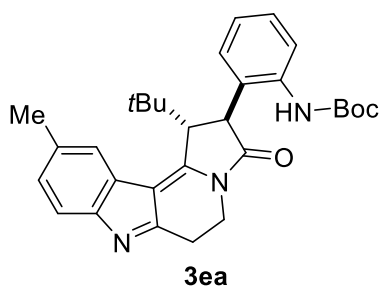

The reaction was run at 70 °C for 22 h, affording product **3ea** in 93% yield (45.2 mg) as a yellow solid.  $R_f = 0.3$  (PE:EA = 1:2), m.p. 118.9–122.2 °C.

$^1\text{H NMR}$  (600 MHz,  $\text{CDCl}_3$ )  $\delta$  7.97 (s, 1H), 7.76 (d,  $J = 7.6$  Hz, 1H), 7.52 – 7.46 (m, 2H), 7.29 – 7.24 (m, 1H), 7.16 – 7.12 (m, 1H), 7.03 – 6.95 (m, 2H), 4.16 (s, 1H), 3.92 (t,  $J = 7.4$  Hz, 2H), 3.60 (s, 1H), 3.16

– 3.04 (m, 2H), 2.46 (s, 3H), 1.54 (s, 9H), 1.13 (s, 9H).

$^{13}\text{C NMR}$  (151 MHz,  $\text{CDCl}_3$ )  $\delta$  176.1, 163.4, 155.7, 155.4, 154.0, 135.2, 134.2, 129.3, 129.2, 128.2, 127.0, 125.8, 125.7, 124.1, 121.7, 120.2, 117.8, 80.4, 53.7, 46.5, 38.9, 38.7, 28.3, 28.0, 25.3, 21.1.

HRMS (ESI-TOF) calcd for  $\text{C}_{30}\text{H}_{36}\text{N}_3\text{O}_3^+$  ( $[\text{M}+\text{H}^+]$ ) = 486.2751, Found 486.2750.

**Tert-butyl(2-(1-(tert-butyl)-9-chloro-3-oxo-2,3,5,6-tetrahydro-1H-indolizino[7,8-b]indol-2-yl)phenyl)carbamate 3fa**

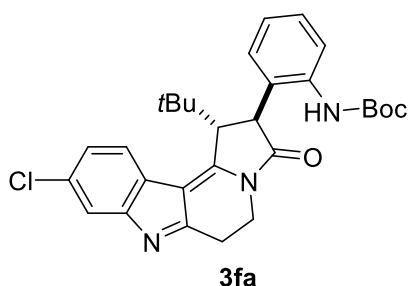

The reaction was run at 70 °C for 22 h, affording product **3fa** in 78% yield (39.5 mg) as a yellow solid.  $R_f = 0.3$  (PE:EA = 1:2), m.p. 117.2–118.4 °C.

$^1\text{H NMR}$  (600 MHz,  $\text{CDCl}_3$ )  $\delta$  7.83 (s, 1H), 7.73 (d,  $J = 8.0$  Hz, 1H), 7.64 – 7.55 (m, 2H), 7.27 (td,  $J = 7.7, 1.5$  Hz, 1H), 7.20 (dd,  $J = 8.1, 2.0$  Hz, 1H), 7.00 (td,  $J = 7.6, 1.3$  Hz, 1H), 6.93 (dd,  $J =$

8.0, 1.5 Hz, 1H), 4.17 (s, 1H), 4.01 – 3.86 (m, 2H), 3.57 (s, 1H), 3.19 – 3.07 (m, 2H), 1.52 (s, 9H), 1.12 (s, 9H).

$^{13}\text{C NMR}$  (101 MHz,  $\text{CDCl}_3$ )  $\delta$  175.9, 164.9, 156.8, 156.2, 153.8, 137.0, 132.6, 128.8, 128.7, 126.6, 125.7, 125.4, 125.0, 124.0, 122.1, 120.6, 117.1, 80.7, 53.9, 46.5, 38.8, 38.7, 28.3, 28.0, 25.3.

HRMS (ESI-TOF) calcd for  $\text{C}_{29}\text{H}_{33}\text{ClN}_3\text{O}_3^+$  ( $[\text{M}+\text{H}^+]$ ) = 506.2205, Found 506.2204.

**Tert-butyl(2-(8-bromo-1-(tert-butyl)-3-oxo-2,3,5,6-tetrahydro-1H-indolizino[7,8-b]indol-2-yl)phenyl)carbamate 3ga**

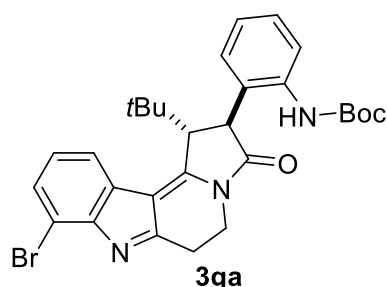

The reaction was run at 70 °C for 22 h, affording product **3ga** in 60% yield (33.0 mg) as a yellow solid.  $R_f = 0.3$  (PE:EA = 1:2), m.p. 111.3–113.1 °C.

$^1\text{H NMR}$  (600 MHz,  $\text{CDCl}_3$ )  $\delta$  7.79 (s, 1H), 7.73 (d,  $J = 8.2$  Hz, 1H), 7.66 (dd,  $J = 7.6, 1.0$  Hz, 1H), 7.49 (dd,  $J = 8.0, 0.9$  Hz, 1H), 7.28

(dd,  $J = 7.6, 1.5$  Hz, 1H), 7.10 (t,  $J = 7.8$  Hz, 1H), 7.00 (td,  $J = 7.6, 1.3$  Hz, 1H), 6.92 (dd,  $J = 7.9, 1.5$  Hz, 1H), 4.18 (s, 1H), 4.04 – 3.85 (m, 2H), 3.61 (s, 1H), 3.21 (t,  $J = 7.4$  Hz, 2H), 1.52 (s, 9H), 1.12 (s, 9H).

$^{13}\text{C}$  NMR (151 MHz,  $\text{CDCl}_3$ )  $\delta$  176.0, 164.1, 157.6, 153.8, 153.6, 136.9, 130.1, 129.8, 128.7, 125.8, 125.7, 125.5, 125.1, 125.0, 120.7, 118.1, 114.3, 80.7, 53.9, 46.5, 38.9, 38.7, 28.3, 28.0, 25.4.

HRMS (ESI-TOF) calcd for  $\text{C}_{29}\text{H}_{33}\text{BrN}_3\text{O}_3^+$  ( $[\text{M}+\text{H}^+]$ ) = 550.1700, Found 550.1703.

### Tert-butyl(2-(1-(tert-butyl)-3-oxo-2,3,5,6-tetrahydro-1H-indolizino[7,8-b]indol-2-yl)-4-fluorophenyl)carbamate **3ab**

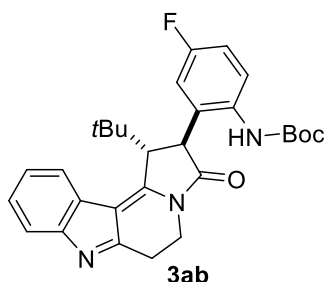

The reaction was run at 70 °C for 22 h, affording product **3ab** in 65% yield (32.0 mg) as a yellow solid.  $R_f = 0.3$  (PE:EA = 1:2), m.p. 140.3–141.7 °C.

$^1\text{H}$  NMR (400 MHz,  $\text{CDCl}_3$ )  $\delta$  7.74 (s, 1H), 7.72 – 7.64 (m, 2H), 7.61 (d,  $J = 7.7$  Hz, 1H), 7.33 (td,  $J = 7.6, 1.2$  Hz, 1H), 7.23 (td,  $J = 7.5, 1.1$  Hz, 1H), 6.99 – 6.94 (m, 1H), 6.67 (dd,  $J = 9.2, 2.9$  Hz, 1H), 4.15 (s, 1H), 4.02

– 3.87 (m, 2H), 3.54 (s, 1H), 3.18 – 3.11 (m, 2H), 1.51 (s, 9H), 1.13 (s, 9H).

$^{13}\text{C}$  NMR (101 MHz,  $\text{CDCl}_3$ )  $\delta$  175.4, 163.3, 159.9 (d,  $J = 247.5$  Hz), 155.9, 154.1, 154.0, 132.9 (d,  $J = 1.5$  Hz), 131.4, 128.0, 127.7, 127.4, 124.2, 121.9, 120.4, 118.3, 115.4 (d,  $J = 22.2$  Hz), 112.3 (d,  $J = 24.4$  Hz), 80.8, 53.7, 46.5, 39.0, 38.8, 28.3, 28.0, 25.3.

$^{19}\text{F}$  NMR (376 MHz,  $\text{CDCl}_3$ )  $\delta$  –115.15.

HRMS (ESI-TOF) calcd for  $\text{C}_{29}\text{H}_{33}\text{FN}_3\text{O}_3^+$  ( $[\text{M}+\text{H}^+]$ ) = 490.2500, Found 490.2504.

### Tert-butyl(4-bromo-2-(1-(tert-butyl)-3-oxo-2,3,5,6-tetrahydro-1H-indolizino[7,8-b]indol-2-yl)phenyl)carbamate **3ac**

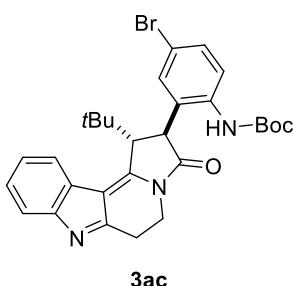

The reaction was run at 70 °C for 22 h, affording product **3ac** in 88% yield (48.4 mg) as a yellow solid.  $R_f = 0.3$  (PE:EA = 1:2), m.p. 146.2–147.5 °C.

$^1\text{H}$  NMR (400 MHz,  $\text{CDCl}_3$ )  $\delta$  7.98 (s, 1H), 7.69 (dd,  $J = 15.1, 8.1$  Hz, 2H), 7.60 (d,  $J = 7.7$  Hz, 1H), 7.37 (dd,  $J = 8.7, 2.2$  Hz, 1H), 7.32 (td,  $J = 7.6, 1.2$  Hz, 1H), 7.23 (td,  $J = 7.5, 1.1$  Hz, 1H), 7.07 (d,  $J = 2.2$  Hz, 1H), 4.10 (s, 1H), 4.04 – 3.84 (m, 2H), 3.56 (s, 1H), 3.23 – 3.06 (m, 2H), 1.51 (s, 9H), 1.11 (s,

9H).

$^{13}\text{C}$  NMR (101 MHz,  $\text{CDCl}_3$ )  $\delta$  175.3, 163.3, 155.8, 153.9, 153.5, 136.3, 131.6, 130.6, 128.3, 128.0,



127.3, 126.7, 124.2, 121.8, 120.3, 118.3, 117.9, 81.0, 53.3, 46.3, 38.9, 38.8, 28.2, 27.9, 25.2.

HRMS (ESI-TOF) calcd for  $C_{29}H_{33}BrN_3O_3^+$  ( $[M+H]^+$ ) = 550.1700, Found 550.1702.

**Tert-butyl(2-(1-(tert-butyl)-3-oxo-2,3,5,6-tetrahydro-1H-indolizino[7,8-b]indol-2-yl)-4-methylphenyl)carbamate 3ad**

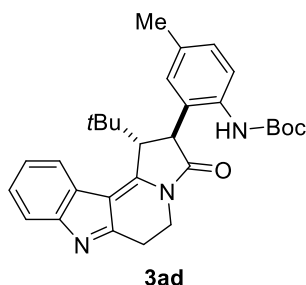

The reaction was run at 70 °C for 22 h, affording product **3ad** in 47% yield (22.7 mg) as a yellow solid.  $R_f$  = 0.3 (PE:EA = 1:2), m.p. 137.4–138.6 °C.

$^1H$  NMR (600 MHz,  $CDCl_3$ )  $\delta$  7.70 (t,  $J$  = 16.6 Hz, 2H), 7.62 (d,  $J$  = 7.7 Hz, 1H), 7.57 (s, 1H), 7.32 (t,  $J$  = 7.5 Hz, 1H), 7.23 (t,  $J$  = 7.5 Hz, 1H), 7.07 (d,  $J$  = 8.3 Hz, 1H), 6.74 (s, 1H), 4.14 (s, 1H), 4.01 (dt,  $J$  = 14.2, 7.3 Hz, 1H), 3.87 (dt,  $J$  = 14.0, 7.6 Hz, 1H), 3.60 (s, 1H), 3.15 (t,  $J$  = 7.5 Hz,

2H), 2.15 (s, 3H), 1.50 (s, 9H), 1.12 (s, 9H).

$^{13}C$  NMR (151 MHz,  $CDCl_3$ )  $\delta$  176.1, 163.4, 155.7, 155.4, 154.0, 135.2, 134.2, 129.3, 129.2, 128.2, 127.0, 125.8, 125.7, 124.1, 121.7, 120.2, 117.8, 80.4, 53.7, 46.5, 38.9, 38.7, 28.3, 28.0, 25.3, 21.1.

HRMS (ESI-TOF) calcd for  $C_{30}H_{36}N_3O_3^+$  ( $[M+H]^+$ ) = 486.2751, Found 486.2752.

**Tert-butyl(2-(1-(tert-butyl)-3-oxo-2,3,5,6-tetrahydro-1H-indolizino[7,8-b]indol-2-yl)-5-chlorophenyl)carbamate 3ae**

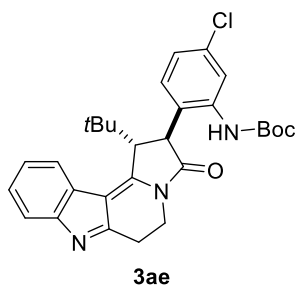

The reaction was run at 70 °C for 22 h, affording product **3ae** in 64% yield (32.6 mg) as a yellow solid.  $R_f$  = 0.3 (PE:EA = 1:2), m.p. 121.6–123.1 °C.

$^1H$  NMR (400 MHz,  $CDCl_3$ )  $\delta$  8.14 (s, 1H), 7.94 – 7.81 (m, 1H), 7.72 (d,  $J$  = 7.3 Hz, 1H), 7.62 (d,  $J$  = 7.6 Hz, 1H), 7.34 (td,  $J$  = 7.6, 1.2 Hz, 1H), 7.23 (dd,  $J$  = 7.5, 1.1 Hz, 1H), 6.95 (dd,  $J$  = 8.5, 2.2 Hz, 1H), 6.87 (d,  $J$  = 8.5 Hz, 1H), 4.08 (s, 1H), 4.00 – 3.85 (m, 2H), 3.57 (s, 1H), 3.22 – 3.04 (m, 2H),

1.55 (s, 9H), 1.13 (s, 9H).

$^{13}C$  NMR (101 MHz,  $CDCl_3$ )  $\delta$  175.5, 163.3, 155.9, 154.3, 153.4, 138.4, 134.4, 128.0, 127.4, 126.3, 126.0, 125.0, 124.6, 124.2, 121.8, 120.4, 118.2, 81.1, 53.6, 46.2, 38.9, 38.7, 28.3, 28.0, 25.3.

HRMS (ESI-TOF) calcd for  $C_{29}H_{33}ClN_3O_3^+$  ( $[M+H]^+$ ) = 506.2205, Found 506.2205.

**Tert-butyl(5-bromo-2-(1-(tert-butyl)-3-oxo-2,3,5,6-tetrahydro-1H-indolizino[7,8-b]indol-2-yl)phenyl)carbamate 3af**

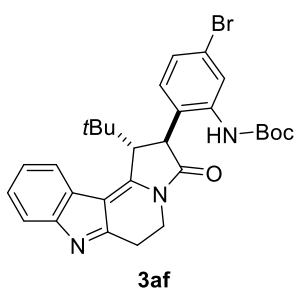

The reaction was run at 70 °C for 22 h, affording product **3af** in 83% yield (45.9 mg) as a yellow solid.  $R_f = 0.3$  (PE:EA = 1:2), m.p. 142.9–143.5 °C.

$^1\text{H NMR}$  (400 MHz,  $\text{CDCl}_3$ )  $\delta$  8.12 (s, 1H), 8.05 – 7.98 (m, 1H), 7.71 (d,  $J = 7.5$  Hz, 1H), 7.62 (d,  $J = 7.7$  Hz, 1H), 7.34 (td,  $J = 7.6, 1.2$  Hz, 1H), 7.23 (dd,  $J = 7.5, 1.1$  Hz, 1H), 7.11 (dd,  $J = 8.4, 2.1$  Hz, 1H), 6.81 (d,  $J = 8.5$  Hz, 1H), 4.07 (s, 1H), 4.00 – 3.87 (m, 2H), 3.56 (s, 1H), 3.21 – 3.04 (m, 2H), 1.55 (s, 9H), 1.13 (s, 9H).

$^{13}\text{C NMR}$  (101 MHz,  $\text{CDCl}_3$ )  $\delta$  175.4, 163.3, 155.9, 154.2, 153.3, 138.5, 128.0, 127.9, 127.5, 127.4, 126.9, 126.3, 124.2, 122.2, 121.8, 120.4, 118.2, 81.1, 53.5, 46.2, 38.9, 38.7, 28.3, 28.0, 25.3.

HRMS (ESI-TOF) calcd for  $\text{C}_{29}\text{H}_{33}\text{BrN}_3\text{O}_3^+$  ( $[\text{M}+\text{H}^+]$ ) = 550.1700, Found 550.1702.

### **Tert-butyl(2-bromo-6-(1-(tert-butyl)-3-oxo-2,3,5,6-tetrahydro-1H-indolizino[7,8-b]indol-2-yl)phenyl)carbamate 3ag**

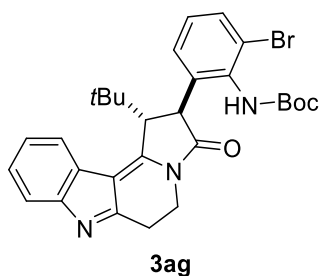

The reaction was run at 70 °C for 22 h, affording product **3ag** in 62% yield (34.1 mg) as a yellow solid.  $R_f = 0.3$  (PE:EA = 1:2), m.p. 147.3–149.1 °C.

$^1\text{H NMR}$  (400 MHz,  $\text{CDCl}_3$ )  $\delta$  7.69 – 7.45 (m, 3H), 7.33 – 7.22 (m, 1H), 7.15 (t,  $J = 7.6$  Hz, 1H), 7.10 – 6.87 (m, 2H), 6.49 (s, 1H), 4.28 (s, 1H),

4.13 – 4.07 (m, 1H), 3.88 – 3.80 (m, 1H), 3.46 (s, 1H), 3.26 – 3.02 (m, 2H), 1.36 (s, 9H), 1.10 (s, 9H).

$^{13}\text{C NMR}$  (151 MHz,  $\text{CDCl}_3$ )  $\delta$  175.3, 163.4, 155.8, 155.7, 153.9, 139.2, 134.7, 132.8, 129.5, 128.4, 126.8, 126.5, 126.1, 123.8, 122.1, 120.0, 117.9, 81.0, 55.1, 47.9, 39.2, 38.7, 28.1, 27.9, 25.3.

HRMS (ESI-TOF) calcd for  $\text{C}_{29}\text{H}_{33}\text{BrN}_3\text{O}_3^+$  ( $[\text{M}+\text{H}^+]$ ) = 550.1700, Found 550.1703.

### **Methyl(2-(1-(tert-butyl)-3-oxo-2,3,5,6-tetrahydro-1H-indolizino[7,8-b]indol-2-yl)phenyl)carbamate 3ah**

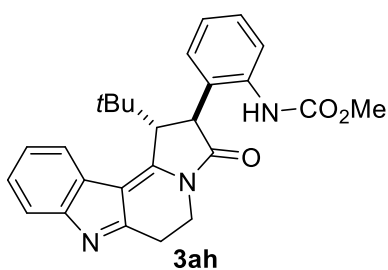

The reaction was run at 70 °C for 22 h, affording product **3ah** in 89% yield (38 mg) as a white solid.  $R_f = 0.4$  (PE:EA = 1:1), m.p. 160.1–162.3 °C.

$^1\text{H NMR}$  (600 MHz,  $\text{CDCl}_3$ )  $\delta$  8.24 (s, 1H), 7.72 (d,  $J = 7.5$  Hz, 2H), 7.61 (d,  $J = 7.8$  Hz, 1H), 7.33 (td,  $J = 7.6, 1.2$  Hz, 1H), 7.30 – 7.26

(m, 1H), 7.23 (td,  $J = 7.5, 1.1$  Hz, 1H), 7.06 – 6.98 (m, 2H), 4.16 (s, 1H), 3.97 – 3.88 (m, 2H), 3.73 (s, 3H), 3.63 (s, 1H), 3.18 – 3.06 (m, 2H), 1.13 (s, 9H).

$^{13}\text{C}$  NMR (101 MHz,  $\text{CDCl}_3$ )  $\delta$  176.0, 163.4, 155.8, 155.0, 154.9, 136.6, 129.1, 129.0, 128.7, 128.1, 127.2, 125.7, 125.4, 124.1, 121.9, 120.2, 117.9, 53.5, 52.4, 46.7, 38.9, 38.6, 27.9, 25.2.

HRMS (ESI-TOF) calcd for  $\text{C}_{26}\text{H}_{28}\text{N}_3\text{O}_3^+$  ( $[\text{M}+\text{H}^+]$ ) = 430.2125, Found 430.2125.

**N-(2-(1-(tert-butyl)-3-oxo-2,3,5,6-tetrahydro-1H-indolizino[7,8-b]indol-2-yl)phenyl)acetamide 3ai**

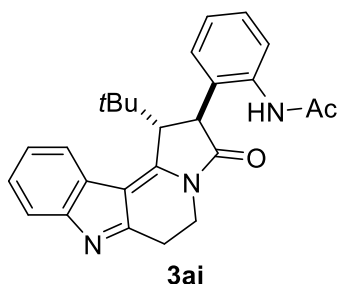

The reaction was run at 70 °C for 22 h, affording product **3ai** in 78% yield (32.2 mg) as a white solid.  $R_f$  = 0.4 (PE:EA = 1:1), m.p. 123.2–124.1 °C.

$^1\text{H}$  NMR (400 MHz,  $\text{CDCl}_3$ )  $\delta$  9.15 (s, 1H), 7.75 (t,  $J$  = 8.8 Hz, 2H), 7.61 (d,  $J$  = 7.7 Hz, 1H), 7.47 – 7.27 (m, 2H), 7.23 (d,  $J$  = 7.5 Hz, 1H), 7.03 (dt,  $J$  = 15.6, 7.6 Hz, 2H), 4.15 (s, 1H), 3.98 – 3.88 (m, 2H), 3.65 (s, 1H), 3.12 (td,  $J$  = 11.3, 10.6, 5.5 Hz, 2H), 2.26 (s, 3H), 1.12 (s, 9H).

$^{13}\text{C}$  NMR (101 MHz,  $\text{CDCl}_3$ )  $\delta$  176.2, 169.1, 163.3, 155.6, 154.8, 136.4, 128.9, 128.6, 127.9, 127.3, 126.5, 126.2, 125.0, 124.2, 121.8, 120.2, 118.1, 53.3, 46.6, 38.8, 38.6, 27.9, 25.1, 24.2.

HRMS (ESI-TOF) calcd for  $\text{C}_{26}\text{H}_{28}\text{N}_3\text{O}_2^+$  ( $[\text{M}+\text{H}^+]$ ) = 414.2176, Found 414.2178.

**2,2,2-trichloroethyl(2-(1-(tert-butyl)-3-oxo-2,3,5,6-tetrahydro-1H-indolizino[7,8-b]indol-2-yl)phenyl)carbamate 3aj**

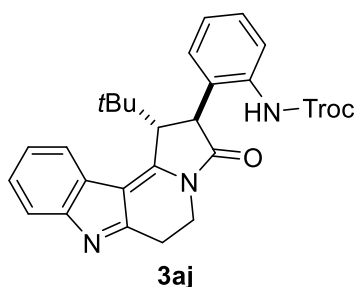

The reaction was run at 70 °C for 22 h, affording product **3aj** in 76% yield (41.2 mg) as a white solid.  $R_f$  = 0.4 (PE:EA = 1:1), m.p. 144.5–145.7 °C.

$^1\text{H}$  NMR (600 MHz,  $\text{CDCl}_3$ )  $\delta$  8.58 (s, 1H), 7.73 (d,  $J$  = 7.6 Hz, 1H), 7.69 (d,  $J$  = 7.6 Hz, 1H), 7.62 (d,  $J$  = 7.8 Hz, 1H), 7.36 – 7.29 (m, 2H), 7.24 (td,  $J$  = 7.5, 1.0 Hz, 1H), 7.10 (td,  $J$  = 7.6, 1.3 Hz, 1H), 7.04 (dd,  $J$  = 7.9, 1.5 Hz, 1H), 4.84 (d,  $J$  = 12.1 Hz, 1H), 4.69 (d,  $J$  = 12.0 Hz, 1H), 4.19 (s, 1H), 3.99 – 3.89 (m, 2H), 3.64 (s, 1H), 3.19 – 3.05 (m, 2H), 1.13 (s, 9H).

$^{13}\text{C}$  NMR (151 MHz,  $\text{CDCl}_3$ )  $\delta$  175.9, 163.4, 155.8, 154.7, 152.9, 135.8, 129.8, 128.9, 128.0, 127.3, 126.6, 126.0, 125.5, 124.1, 121.9, 120.3, 118.1, 95.4, 74.5, 53.4, 46.7, 38.9, 38.7, 27.9, 25.3.

HRMS (ESI-TOF) calcd for  $\text{C}_{27}\text{H}_{27}\text{Cl}_3\text{N}_3\text{O}_3^+$  ( $[\text{M}+\text{H}^+]$ ) = 546.1113, Found 546.1116.

**Benzyl(2-(1-(tert-butyl)-3-oxo-2,3,5,6-tetrahydro-1H-indolizino[7,8-b]indol-2-yl)phenyl)carbamate 3ak**

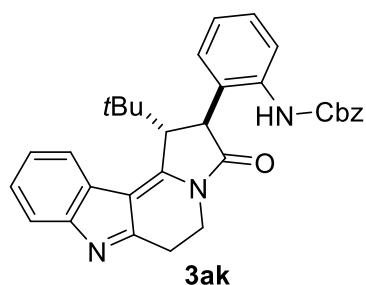

The reaction was run at 70 °C for 22 h, affording product **3ak** in 82% yield (41.4 mg) as a white solid.  $R_f = 0.4$  (PE:EA = 1:1), m.p. 129.4–130.2 °C.

$^1\text{H NMR}$  (600 MHz,  $\text{CDCl}_3$ )  $\delta$  8.33 (s, 1H), 7.73 (d,  $J = 7.6$  Hz, 2H), 7.61 (d,  $J = 7.9$  Hz, 1H), 7.45 – 7.36 (m, 4H), 7.36 – 7.27 (m, 3H), 7.24 (td,  $J = 7.5, 1.1$  Hz, 1H), 7.08 – 6.98 (m, 2H), 5.19 (d,  $J = 12.3$  Hz, 1H),

5.14 – 5.08 (m, 1H), 4.16 (s, 1H), 3.96 – 3.84 (m, 2H), 3.63 (s, 1H), 3.16 – 3.03 (m, 2H), 1.11 (s, 9H).  
 $^{13}\text{C NMR}$  (151 MHz,  $\text{CDCl}_3$ )  $\delta$  175.9, 163.4, 155.7, 155.1, 155.0, 154.5, 154.5, 136.4, 136.1, 129.4, 128.9, 128.7, 128.5, 128.2, 128.2, 128.0, 127.1, 125.9, 125.4, 124.0, 121.9, 120.2, 117.8, 67.0, 53.6, 53.5, 46.7, 38.8, 38.6, 27.9, 25.2.

HRMS (ESI–TOF) calcd for  $\text{C}_{32}\text{H}_{32}\text{N}_3\text{O}_3^+$  ( $[\text{M}+\text{H}^+]$ ) = 506.2438, Found 506.2439.

**N-(2-(1-(tert-butyl)-3-oxo-2,3,5,6-tetrahydro-1H-indolizino[7,8-b]indol-2-yl)phenyl)benzamide**  
**3al**

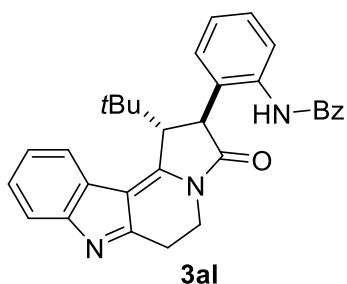

The reaction was run at 70 °C for 22 h, affording product **3al** in 89% yield (42.4 mg) as a white solid.  $R_f = 0.4$  (PE:EA = 1:1), m.p. 151.5–153.2 °C.

$^1\text{H NMR}$  (400 MHz,  $\text{CDCl}_3$ )  $\delta$  10.10 (s, 1H), 8.16 – 8.09 (m, 2H), 7.99 (d,  $J = 8.0$  Hz, 1H), 7.79 (d,  $J = 7.5$  Hz, 1H), 7.66 – 7.50 (m, 4H), 7.36

(tt,  $J = 8.4, 2.5$  Hz, 2H), 7.29 (dd,  $J = 7.5, 1.1$  Hz, 1H), 7.12 – 7.04 (m, 2H), 4.23 (s, 1H), 4.05 – 3.87 (m, 2H), 3.73 (s, 1H), 3.23 – 3.02 (m, 2H), 1.11 (s, 9H).

$^{13}\text{C NMR}$  (101 MHz,  $\text{CDCl}_3$ )  $\delta$  176.5, 165.6, 163.3, 155.8, 154.3, 137.0, 134.1, 132.0, 128.8, 128.7, 128.5, 128.0, 127.4, 127.4, 126.3, 126.1, 125.0, 124.2, 121.9, 120.3, 118.3, 53.0, 46.9, 38.8, 38.6, 28.0, 25.3.

HRMS (ESI–TOF) calcd for  $\text{C}_{31}\text{H}_{30}\text{N}_3\text{O}_2^+$  ( $[\text{M}+\text{H}^+]$ ) = 476.2333, Found 476.2334.

**N-(2-(1-(tert-butyl)-3-oxo-2,3,5,6-tetrahydro-1H-indolizino[7,8-b]indol-2-yl)phenyl)-4-methyl benzenesulfonamide**  
**3am**

The reaction was run at 70 °C for 22 h, affording product **3am** in 86% yield (45.1 mg) as a white solid.  $R_f = 0.4$  (PE:EA = 1:1), m.p. 145.2–146.7 °C.

$^1\text{H NMR}$  (400 MHz,  $\text{CDCl}_3$ )  $\delta$  8.83 (s, 1H), 7.77 (d,  $J = 8.2$  Hz, 2H), 7.70 (d,  $J = 7.5$  Hz, 1H), 7.60 (d,  $J = 7.7$  Hz, 1H), 7.41 (dd,  $J = 8.1, 1.4$  Hz, 1H), 7.36 – 7.26 (m, 3H), 7.22 (q,  $J = 8.1$  Hz, 2H), 7.06

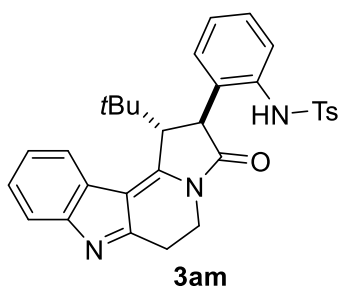

(td,  $J = 7.7, 1.4$  Hz, 1H), 6.95 (dd,  $J = 8.0, 1.5$  Hz, 1H), 4.04 (s, 1H), 3.97 – 3.83 (m, 2H), 3.56 (s, 1H), 3.19 – 2.97 (m, 2H), 2.40 (s, 3H), 0.96 (s, 9H).

$^{13}\text{C}$  NMR (101 MHz,  $\text{CDCl}_3$ )  $\delta$  175.8, 163.4, 155.8, 154.4, 143.7, 138.2, 135.9, 130.3, 129.9, 128.9, 128.0, 127.3, 126.9, 126.9, 126.5, 125.2, 124.1, 121.7, 120.3, 118.0, 52.7, 46.4, 38.8, 38.4, 27.7, 25.2, 21.5.

HRMS (ESI-TOF) calcd for  $\text{C}_{31}\text{H}_{32}\text{N}_3\text{O}_3\text{S}^+$  ( $[\text{M}+\text{H}^+]$ ) = 526.2159,

Found 526.2161.

**N-(2-(1-(tert-butyl)-3-oxo-2,3,5,6-tetrahydro-1H-indolizino[7,8-b]indol-2-yl)phenyl) benzene sulfonamide 3an**

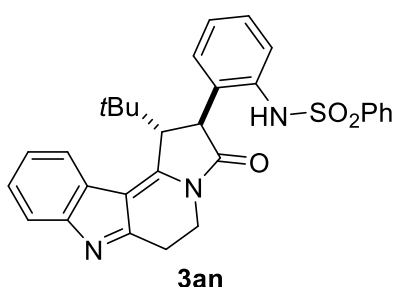

The reaction was run at 70 °C for 22 h, affording product **3an** in 87% yield (44.4 mg) as a white solid.  $R_f = 0.4$  (PE:EA = 1:1), m.p. 104.6–105.2 °C.

$^1\text{H}$  NMR (600 MHz,  $\text{CDCl}_3$ )  $\delta$  8.92 (s, 1H), 7.90 (d,  $J = 7.8$  Hz, 2H), 7.70 (d,  $J = 7.6$  Hz, 1H), 7.58 (dd,  $J = 22.1, 7.6$  Hz, 2H), 7.50 (t,  $J = 7.6$  Hz, 2H), 7.39 (d,  $J = 8.0$  Hz, 1H), 7.33 (t,  $J = 7.6$  Hz, 1H),

7.22 (dt,  $J = 12.9, 7.6$  Hz, 2H), 7.06 (t,  $J = 7.6$  Hz, 1H), 6.96 (d,  $J = 7.9$  Hz, 1H), 4.07 (s, 1H), 3.96 – 3.83 (m, 2H), 3.56 (s, 1H), 3.17 – 3.01 (m, 2H), 0.97 (s, 9H).

$^{13}\text{C}$  NMR (151 MHz,  $\text{CDCl}_3$ )  $\delta$  175.8, 163.4, 155.8, 154.4, 141.2, 135.8, 132.9, 130.4, 129.3, 128.9, 128.0, 127.3, 127.0, 126.9, 126.4, 125.3, 124.1, 121.7, 120.3, 118.1, 52.7, 46.4, 38.8, 38.5, 27.8, 25.2.

HRMS (ESI-TOF) calcd for  $\text{C}_{30}\text{H}_{29}\text{N}_3\text{O}_3\text{S}^+$  ( $[\text{M}+\text{H}^+]$ ) = 512.2002, Found 512.2004.

**2-(2-aminophenyl)-1-(tert-butyl)-1,2,5,6-tetrahydro-3H-indolizino[7,8-b]indol-3-one 3ao**

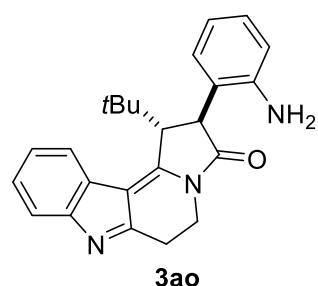

The reaction was run at 70 °C for 22 h, affording product **3ao** in 75% yield (27.8 mg) as a white solid.  $R_f = 0.4$  (PE:EA = 1:1), m.p. 180.5–181.7 °C.

$^1\text{H}$  NMR (400 MHz,  $\text{DMSO}-d_6$ )  $\delta$  11.21 (s, 1H), 7.57 (d,  $J = 7.7$  Hz, 1H), 7.35 (d,  $J = 8.0$  Hz, 1H), 7.14 – 6.91 (m, 4H), 6.75 (s, 1H), 6.59 (dt,  $J = 7.6, 3.3$  Hz, 2H), 4.12 – 3.96 (m, 1H), 3.47 (s, 1H), 3.05 (dt,  $J = 13.6, 7.9$

Hz, 1H), 2.91 – 2.77 (m, 2H), 2.62 (s, 1H), 0.69 (s, 9H).

$^{13}\text{C}$  NMR (101 MHz,  $\text{DMSO}-d_6$ )  $\delta$  170.5, 142.7, 135.7, 134.7, 127.5, 126.6, 126.3, 121.7, 120.9, 120.3, 118.9, 116.9, 114.7, 111.0, 108.6, 74.8, 54.3, 48.8, 32.5, 32.1, 28.6, 22.5.

HRMS (ESI-TOF) calcd for  $C_{24}H_{26}N_3O^+$  ( $[M+H^+]$ ) = 372.2070, Found 372.2070.

**1-(tert-butyl)-2-(2-(methylamino)phenyl)-1,2,5,6-tetrahydro-3H-indolizino[7,8-b]indol-3-one**  
**3ap**

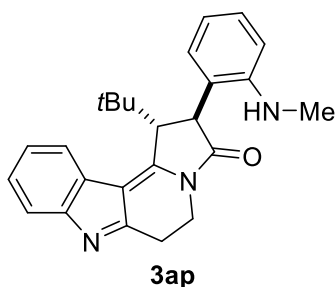

The reaction was run at 70 °C for 22 h, affording product **3ap** in 13% yield (5.0 mg) as a white solid.  $R_f = 0.4$  (PE:EA = 1:1), m.p. 120.3–121.8 °C.

$^1H$  NMR (400 MHz,  $CDCl_3$ )  $\delta$  8.42 (s, 1H), 7.55 (dd,  $J = 8.0, 1.1$  Hz, 1H), 7.40 – 7.34 (m, 1H), 7.24 – 7.16 (m, 3H), 7.15 – 7.11 (m, 1H), 6.79 (t,  $J = 7.5$  Hz, 2H), 4.48 – 4.38 (m, 1H), 3.57 (s, 1H), 3.12 – 2.96

(m, 2H), 2.91 – 2.77 (m, 2H), 2.73 (s, 3H), 0.68 (s, 9H).

$^{13}C$  NMR (151 MHz,  $CDCl_3$ )  $\delta$  172.3, 144.9, 135.7, 134.3, 128.4, 127.0, 126.5, 123.6, 122.4, 120.7, 120.5, 118.5, 114.6, 110.9, 109.0, 80.8, 56.8, 49.9, 35.6, 35.3, 33.0, 28.7, 22.9.

HRMS (ESI-TOF) calcd for  $C_{25}H_{28}N_3O^+$  ( $[M+H^+]$ ) = 386.2227, Found 386.2221.

## 6. General procedure and spectral data of products 5

A sealed tube was charged with isocyanide **1a** (0.15 mmol), 3-alkenyl-benzofuran-2-one **4** (0.1 mmol), and DBU (0.3 mmol), ClCH<sub>2</sub>CH<sub>2</sub>Cl (1.0 mL) was then added. The reaction mixture continued stirring at 80 °C for 24 h under N<sub>2</sub>. The residue was directly purified by flash chromatography on silica gel using petroleum ether/ethyl acetate/dichloromethane= 2/1/1 as eluent to afford the desired products **5**.

### 16-(tert-butyl)-6,7-dihydro-5H-10,15a-methanobenzo[6',7']-[1,3]oxazepino[3',2':1,2]pyrido[4,3-b]indol-9(10H)-one **5a**

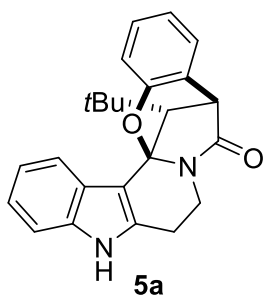

The reaction was run at rt for 24 h, affording product **5a** in 72% yield as a white solid.  $R_f = 0.4$  (PE:EA:DCM = 2:1:1), m.p. 252.7–254.1 °C.

<sup>1</sup>H NMR (400 MHz, DMSO-*d*<sub>6</sub>) δ 11.35 (s, 1H), 7.57 (d,  $J = 7.8$  Hz, 1H), 7.38 (d,  $J = 8.1$  Hz, 1H), 7.31 – 7.26 (m, 1H), 7.17 (td,  $J = 7.8, 1.7$  Hz, 1H), 7.11 (t,  $J = 7.3$  Hz, 1H), 7.03 (t,  $J = 7.4$  Hz, 1H), 6.90 (t,  $J = 7.4$  Hz, 1H), 6.75 (d,  $J = 8.1$  Hz, 1H), 4.11 (dt,  $J = 12.7, 3.2$  Hz, 1H), 3.69 (s, 1H), 3.07 – 3.00 (m,

1H), 2.94 – 2.85 (m, 2H), 2.81 (s, 1H), 0.72 (s, 9H).

<sup>13</sup>C NMR (151 MHz, DMSO-*d*<sub>6</sub>) δ 172.6, 153.0, 135.7, 135.4, 128.6, 127.0, 126.1, 123.9, 121.1, 120.3, 119.9, 119.3, 116.2, 111.1, 106.9, 93.5, 54.4, 46.7, 33.6, 32.2, 28.2, 21.9.

HRMS (ESI-TOF) calcd for C<sub>24</sub>H<sub>25</sub>N<sub>2</sub>O<sub>2</sub><sup>+</sup> ([M+H<sup>+</sup>]) = 373.1911, Found 373.1907.

### 2-fluoro-16-(tert-butyl)-6,7-dihydro-5H-10,15a-methanobenzo[6',7']-[1,3]oxazepino[3',2':1,2]pyrido[4,3-b]indol-9(10H)-one **5b**

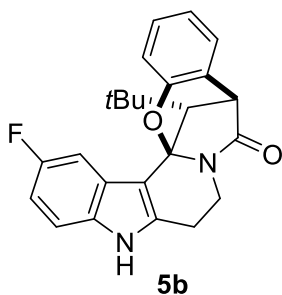

The reaction was run at rt for 24 h, affording product **5b** in 67% yield as a white solid.  $R_f = 0.4$  (PE:EA:DCM = 2:1:1), m.p. 258.2–258.9 °C.

<sup>1</sup>H NMR (600 MHz, DMSO-*d*<sub>6</sub>) δ 11.46 (s, 1H), 7.46 – 7.25 (m, 3H), 7.17 (t,  $J = 7.8$  Hz, 1H), 7.02 – 6.86 (m, 2H), 6.76 (t,  $J = 8.3$  Hz, 1H), 4.15 – 4.04 (m, 1H), 3.68 (s, 1H), 3.10 – 2.98 (m, 1H), 2.95 – 2.85 (m, 3H), 0.73 (s, 9H).

<sup>13</sup>C NMR (151 MHz, DMSO-*d*<sub>6</sub>) δ 172.6, 156.3 ( $J = 226.5$  Hz), 153.0, 137.5, 132.4, 128.6, 127.0, 126.4, 123.8, 120.3, 116.2, 112.2, 109.2 ( $J = 15.1$  Hz), 107.3, 104.9 ( $J = 30.2$  Hz), 93.3, 53.9, 46.6, 33.5, 32.2, 28.1, 22.0.

<sup>19</sup>F NMR (565 MHz, DMSO-*d*<sub>6</sub>) δ –124.25.

HRMS (ESI-TOF) calcd for C<sub>24</sub>H<sub>24</sub>FN<sub>2</sub>O<sub>2</sub><sup>+</sup> ([M+H<sup>+</sup>]) = 391.1816, Found 391.1816.

**2-chloro-16-(tert-butyl)-6,7-dihydro-5H-10,15a-methanobenzo[6',7']-[1,3]oxazepino[3',2':1,2]pyrido[4,3-b]indol-9(10H)-one 5c**

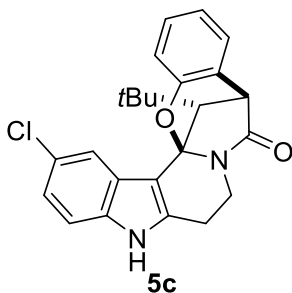

The reaction was run at rt for 24 h, affording product **5c** in 60% yield as a white solid.  $R_f = 0.4$  (PE:EA:DCM = 2:1:1), m.p. 256.2–257.0 °C.

$^1\text{H NMR}$  (600 MHz, DMSO- $d_6$ )  $\delta$  11.58 (s, 1H), 7.61 (s, 1H), 7.40 (d,  $J = 8.6$  Hz, 1H), 7.28 (d,  $J = 7.6$  Hz, 1H), 7.24 – 7.03 (m, 2H), 6.90 (t,  $J = 7.6$  Hz, 1H), 6.78 (d,  $J = 8.4$  Hz, 1H), 4.10 (d,  $J = 11.9$  Hz, 1H), 3.68 (s, 1H), 3.13 – 2.77 (m, 4H), 0.72 (s, 9H).

$^{13}\text{C NMR}$  (151 MHz, DMSO- $d_6$ )  $\delta$  172.5, 152.8, 137.3, 134.2, 128.6, 127.2, 126.9, 124.0, 123.8, 121.1, 120.3, 118.9, 116.2, 112.7, 106.9, 93.2, 54.0, 46.6, 33.4, 32.2, 28.1, 21.9.

HRMS (ESI-TOF) calcd for  $\text{C}_{24}\text{H}_{24}\text{ClN}_2\text{O}_2^+$  ( $[\text{M}+\text{H}^+]$ ) = 407.1521, Found 407.1518.

**2-bromo-16-(tert-butyl)-6,7-dihydro-5H-10,15a-methanobenzo[6',7']-[1,3]oxazepino[3',2':1,2]pyrido[4,3-b]indol-9(10H)-one 5d**

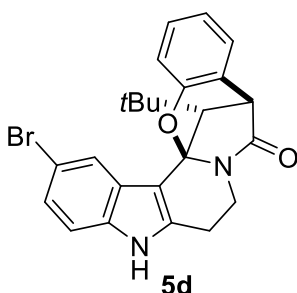

The reaction was run at rt for 24 h, affording product **5d** in 72% yield as a white solid.  $R_f = 0.4$  (PE:EA:DCM = 2:1:1), m.p. 259.2–260.2 °C.

$^1\text{H NMR}$  (600 MHz, DMSO- $d_6$ )  $\delta$  11.59 (s, 1H), 7.75 (s, 1H), 7.36 (d,  $J = 8.6$  Hz, 1H), 7.28 (d,  $J = 7.5$  Hz, 1H), 7.22 (d,  $J = 8.6$  Hz, 1H), 7.17 (t,  $J = 7.8$  Hz, 1H), 6.90 (t,  $J = 7.5$  Hz, 1H), 6.78 (d,  $J = 8.1$  Hz, 1H), 4.10 (dd,  $J = 12.0, 4.6$  Hz, 1H), 3.68 (s, 1H), 3.05 – 2.98 (m, 1H), 2.93 – 2.88 (m, 3H),

0.71 (s, 9H).

$^{13}\text{C NMR}$  (151 MHz, DMSO- $d_6$ )  $\delta$  172.6, 152.9, 137.2, 134.5, 128.6, 127.9, 127.0, 123.8, 123.7, 121.9, 120.4, 116.3, 113.2, 112.0, 106.8, 93.2, 54.0, 46.6, 33.5, 32.2, 28.1, 21.9.

HRMS (ESI-TOF) calcd for  $\text{C}_{24}\text{H}_{24}\text{BrN}_2\text{O}_2^+$  ( $[\text{M}+\text{H}^+]$ ) = 451.1016, Found 451.1014.

**2-methyl-16-(tert-butyl)-6,7-dihydro-5H-10,15a-methanobenzo[6',7']-[1,3]oxazepino[3',2':1,2]pyrido[4,3-b]indol-9(10H)-one 5e**

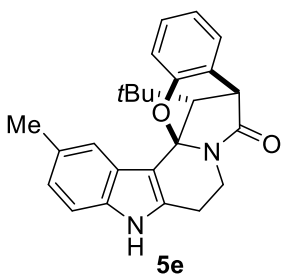

The reaction was run at rt for 24 h, affording product **5e** in 53% yield as a white solid.  $R_f = 0.4$  (PE:EA:DCM = 2:1:1), m.p. 243.2–244.8 °C.

$^1\text{H NMR}$  (400 MHz, DMSO- $d_6$ )  $\delta$  11.20 (s, 1H), 7.36 (s, 1H), 7.30 – 7.22 (m, 2H), 7.17 (dd,  $J = 8.6, 6.8$  Hz, 1H), 6.90 (q,  $J = 7.6$  Hz, 2H), 6.76 (d,  $J = 7.9$  Hz, 1H), 4.09 (dt,  $J = 12.8, 2.9$  Hz, 1H), 3.68 (s, 1H), 3.08 – 2.94 (m,



1H), 2.87 (q,  $J = 4.1$  Hz, 2H), 2.79 (s, 1H), 2.36 (s, 3H), 0.72 (s, 9H).

$^{13}\text{C}$  NMR (101 MHz,  $\text{DMSO-}d_6$ )  $\delta$  172.5, 153.0, 135.3, 134.0, 128.6, 127.8, 126.9, 126.4, 123.9, 122.6, 120.3, 119.6, 116.2, 110.8, 106.4, 93.6, 54.3, 46.7, 33.6, 32.3, 28.2, 21.9, 21.2.

HRMS (ESI-TOF) calcd for  $\text{C}_{25}\text{H}_{27}\text{N}_2\text{O}_2^+$  ( $[\text{M}+\text{H}^+]$ ) = 387.2067, Found 387.2066.

**3-chloro-16-(tert-butyl)-6,7-dihydro-5H-10,15a-methanobenzo[6',7']-[1,3]oxazepino[3',2':1,2]pyrido[4,3-b]indol-9(10H)-one 5f**

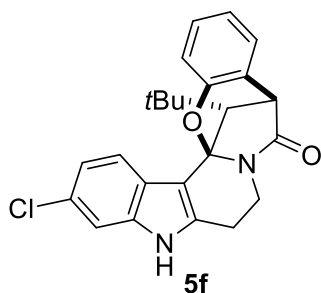

The reaction was run at rt for 24 h, affording product **5f** in 65% yield as a white solid.  $R_f = 0.4$  (PE:EA:DCM = 2:1:1), m.p. 257.2–258.3 °C.

$^1\text{H}$  NMR (400 MHz,  $\text{DMSO-}d_6$ )  $\delta$  11.54 (s, 1H), 7.59 (d,  $J = 8.4$  Hz, 1H), 7.44 (d,  $J = 1.9$  Hz, 1H), 7.29 (dd,  $J = 7.5, 1.7$  Hz, 1H), 7.17 (td,  $J = 7.7, 1.6$  Hz, 1H), 7.06 (dd,  $J = 8.4, 1.9$  Hz, 1H), 6.90 (td,  $J = 7.5, 1.2$  Hz, 1H), 6.75 (dd,  $J = 8.1, 1.1$  Hz, 1H), 4.16 – 4.09 (m, 1H), 3.70 (s, 1H), 3.08 –

3.00 (m, 1H), 2.95 – 2.87 (m, 2H), 2.82 (s, 1H), 0.71 (s, 9H).

$^{13}\text{C}$  NMR (151 MHz,  $\text{DMSO-}d_6$ )  $\delta$  172.5, 152.9, 136.7, 136.2, 128.6, 127.0, 125.8, 124.9, 123.8, 121.1, 120.4, 119.7, 116.2, 110.9, 107.2, 93.2, 54.3, 46.6, 33.5, 32.2, 28.1, 21.8.

HRMS (ESI-TOF) calcd for  $\text{C}_{24}\text{H}_{24}\text{ClN}_2\text{O}_2^+$  ( $[\text{M}+\text{H}^+]$ ) = 407.1521, Found 407.1517.

**4-bromo-16-(tert-butyl)-6,7-dihydro-5H-10,15a-methanobenzo[6',7']-[1,3]oxazepino[3',2':1,2]pyrido[4,3-b]indol-9(10H)-one 5g**

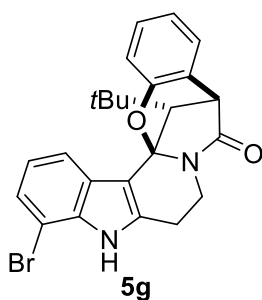

The reaction was run at rt for 24 h, affording product **5g** in 72% yield as a white solid.  $R_f = 0.4$  (PE:EA:DCM = 2:1:1), m.p. 255.2–256.9 °C.

$^1\text{H}$  NMR (400 MHz,  $\text{DMSO-}d_6$ )  $\delta$  11.58 (s, 1H), 7.59 (d,  $J = 7.8$  Hz, 1H), 7.32 (dd,  $J = 7.6, 0.9$  Hz, 1H), 7.28 (dd,  $J = 7.5, 1.7$  Hz, 1H), 7.16 (td,  $J = 7.7, 1.7$  Hz, 1H), 6.99 (t,  $J = 7.7$  Hz, 1H), 6.89 (td,  $J = 7.5, 1.2$  Hz, 1H), 6.74 (dd,  $J = 8.1, 1.2$  Hz, 1H), 4.11 (dd,  $J = 12.2, 5.9$  Hz, 1H), 3.69 (s, 1H), 3.08

– 2.96 (m, 2H), 2.93 – 2.84 (m, 1H), 2.82 (s, 1H), 0.70 (s, 9H).

$^{13}\text{C}$  NMR (151 MHz,  $\text{DMSO-}d_6$ )  $\delta$  172.6, 152.9, 137.1, 134.3, 128.7, 127.8, 127.1, 123.8, 121.0, 120.5, 119.5, 119.2, 116.2, 108.4, 103.9, 93.3, 54.3, 46.6, 33.6, 32.3, 28.2, 21.9.

HRMS (ESI-TOF) calcd for  $\text{C}_{24}\text{H}_{24}\text{BrN}_2\text{O}_2^+$  ( $[\text{M}+\text{H}^+]$ ) = 451.1016, Found 451.1008.

## 7. Experimental procedure for the scale-up reaction and transformation of the product 3aa

### a) Scale-up version of the reaction

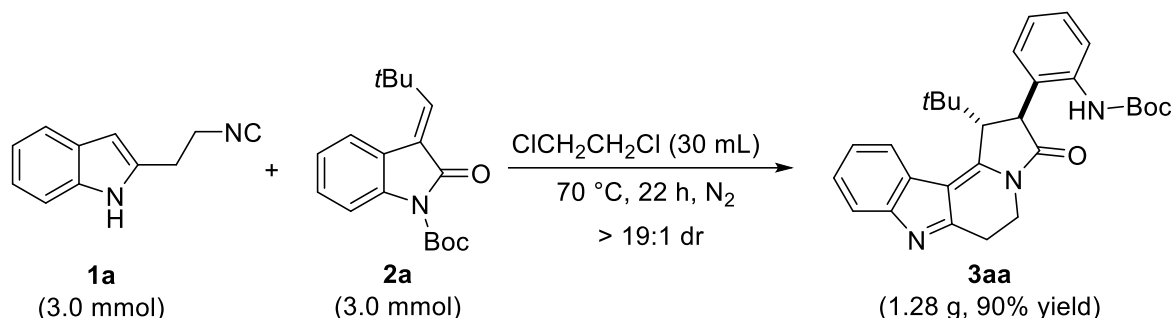

**Procedure:** A dry round bottle was charged with **1a** (3.0 mmol, 510 mg) and **2a** (3.0 mmol, 900 mg). Then  $\text{ClCH}_2\text{CH}_2\text{Cl}$  (30 mL) was added. The reaction mixture was stirred at  $70\text{ }^\circ\text{C}$  for 22 h under  $\text{N}_2$ . TLC monitored the reaction. The  $\text{ClCH}_2\text{CH}_2\text{Cl}$  was removed under reduced pressure after the starting material was completed. The residue was directly purified by flash chromatography on silica gel using petroleum ether/ethyl acetate = 1/2 as eluent to afford the desired product **3aa** in 90% yield.

### b) Transformation of the product 3aa

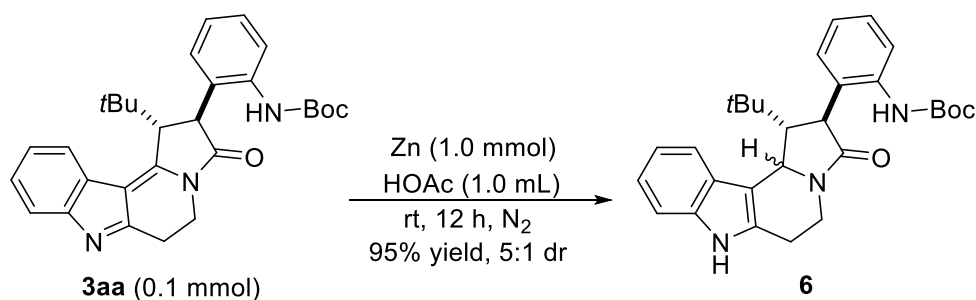

**Procedure:** A dry round bottle was charged with **3aa** (0.1 mmol) and Zn (1.0 mmol). Then HOAc (1.0 mL) was added under  $\text{N}_2$ . The reaction mixture was stirred at room temperature for 12 h. After the starting material was consumed, the reaction is quenched with  $\text{NaHCO}_3$  and filtered. The filtrate was extracted with EtOAc, washed with water, dried over anhydrous  $\text{Na}_2\text{SO}_4$ , and the solvent was removed in vacuo. The crude product was purified by flash silica gel column chromatography using petroleum ether/ethyl acetate = 2/1 as eluent to afford the desired product **6** in 95% yield, with 5:1 *dr*.

### (2-(1-(tert-butyl)-3-oxo-2,3,5,6,6a,7-hexahydro-1H-indolizino[7,8-b]indol-2-yl)phenyl) carbamate **6**

The reaction was run at rt for 12 h, affording product **6** in 95% yield as a white solid.  $R_f = 0.6$  (PE:EA = 1:2), m.p.  $170.3\text{--}171.8\text{ }^\circ\text{C}$ .

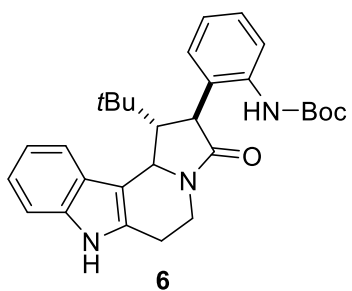

$^1\text{H}$  NMR (400 MHz,  $\text{DMSO-}d_6$ )  $\delta$  11.00 (s, 1H), 9.09 (s, 1H), 7.69 – 7.39 (m, 2H), 7.39 – 7.07 (m, 4H), 7.07 – 6.88 (m, 2H), 5.28 (d,  $J = 5.5$  Hz, 1H), 4.39 (d,  $J = 11.5$  Hz, 1H), 4.03 (s, 1H), 3.09 – 2.74 (m, 3H), 2.68 (d,  $J = 5.5$  Hz, 1H), 1.47 (s, 9H), 0.79 (s, 9H).

$^{13}\text{C}$  NMR (101 MHz,  $\text{DMSO-}d_6$ )  $\delta$  173.7, 153.5, 137.0, 135.7, 132.8, 132.1, 127.1, 126.5, 126.5, 126.1, 124.8, 120.7, 118.7, 118.6, 110.9,

106.6, 78.7, 55.6, 53.5, 48.3, 36.9, 33.6, 28.3, 28.0, 22.6.

HRMS (ESI-TOF) calcd for  $\text{C}_{29}\text{H}_{36}\text{N}_3\text{O}_3^+$  ( $[\text{M}+\text{H}^+]$ ) = 474.2751, Found 474.2742.

## 8. Quantum chemical calculations

The exchange and correlation electronic effects are considered by employing the density functional theory (DFT)<sup>4</sup> at the M06-2X-D3 level,<sup>5</sup> which included Grimme's zero-damping D3-dispersion correction.<sup>6</sup> The ultrafine grid (99,590), having 99 radial shells and 590 angular points per shell, is used to evaluate the numerical integration accuracy. Geometry optimizations are performed with the double-zeta basis set 6-31G(d,p) in the dichloroethane medium while using Truhlar's SMD solvation model.<sup>7</sup> The temperature is set to 343.15 K for thermochemistry analysis. Based on the optimized structures, the electronic energy ( $E_{\text{electron}}$ ) and solvation free energy ( $\Delta G_{\text{solv}}$ ) are calculated at the same level of theory. The harmonic vibrational frequencies are analyzed after the geometry optimizations to characterize the nature of the stationary point as a minimum with all positive frequencies or as a transition state with only one imaginary frequency and to provide the zero-point energy ( $E_{\text{ZPE}}$ ), total entropy ( $S_{\text{tot}}$ ) and thermal correction to enthalpy ( $H_{\text{corr}}$ ) at the same theoretical level. The Gibbs free energies of free substrates ( $G_i$ ) are defined as reference-point. In addition, the intrinsic reaction coordinate (IRC)<sup>8</sup> calculations are carried out to verify the transition state (TS) associated with the correct reactant complexes (RC), intermediate (IM) and product complexes (PC) at the same level of theory. All calculations were carried out with Gaussian 16 program.<sup>9</sup>

$$G = E_{\text{electron}} + \Delta G_{\text{solv}} + E_{\text{ZPE}} + H_{\text{corr}} - TS_{\text{tot}} \quad (1)$$

$$\Delta G = G - \sum_i G_i \quad (2)$$

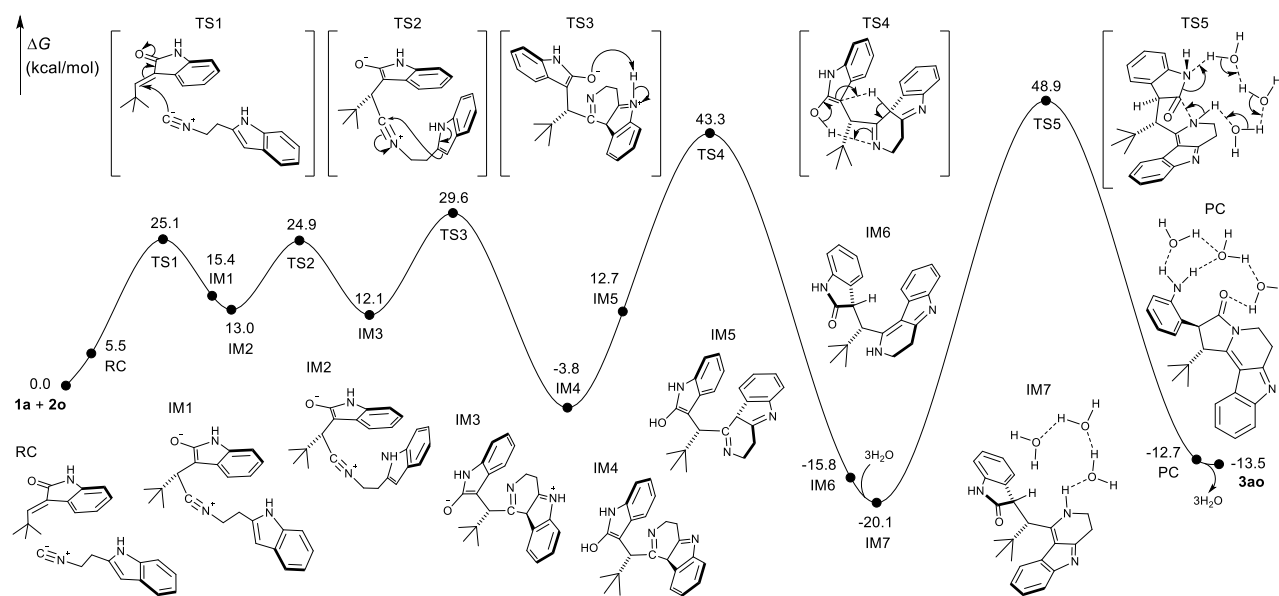

**Figure 1.** The relative energy profiles (kcal/mol) of reaction pathways at the M06-2X-D3/6-31G(d,p)/SMD(Dichloroethane) level of theory.

Cartesian coordinate for theoretical calculation

**1a**

|   |             |             |             |
|---|-------------|-------------|-------------|
| C | -1.33778900 | 0.69150000  | 0.00016900  |
| C | -1.50949700 | -0.71597900 | 0.00003700  |
| C | -2.77277600 | -1.31668700 | -0.00024400 |
| C | -3.87651500 | -0.47841600 | -0.00038500 |
| C | -3.73085900 | 0.92374200  | -0.00025200 |
| C | -2.47738100 | 1.51358600  | 0.00001900  |
| C | 0.07812300  | 0.93606100  | 0.00045200  |
| H | -2.88052500 | -2.39683200 | -0.00034600 |
| H | -4.87252300 | -0.91005500 | -0.00059900 |
| H | -4.61865100 | 1.54839200  | -0.00036400 |
| H | -2.37377800 | 2.59483600  | 0.00012200  |
| N | -0.25624200 | -1.27939900 | 0.00022100  |
| C | 0.69876000  | -0.28699700 | 0.00044200  |
| H | 0.56753100  | 1.89997700  | 0.00060000  |
| C | 2.15079400  | -0.64681300 | 0.00070100  |
| H | 2.38715300  | -1.25236800 | 0.88282600  |
| H | 2.38702600  | -1.25396700 | -0.88035500 |
| H | -0.05789200 | -2.27046200 | 0.00011800  |
| C | 3.02796100  | 0.60253000  | -0.00049400 |
| H | 2.83661000  | 1.21306900  | 0.88578600  |
| H | 2.83639000  | 1.21151400  | -0.88779200 |
| C | 5.53497600  | -0.07474100 | -0.00028000 |
| N | 4.40965300  | 0.24071100  | -0.00036200 |

**2o**

|   |             |             |             |
|---|-------------|-------------|-------------|
| C | -0.89756000 | -0.24396100 | 0.00009900  |
| C | -2.09677700 | 0.50351400  | 0.00005400  |
| C | -3.34963700 | -0.08883400 | 0.00019000  |
| C | -3.40820800 | -1.48366000 | 0.00039300  |
| C | -2.24299600 | -2.24740300 | 0.00045500  |
| C | -0.98704900 | -1.63448100 | 0.00031000  |
| C | 0.20798800  | 0.73481600  | -0.00006900 |
| H | -4.25004600 | 0.51653000  | 0.00014600  |
| H | -4.37606500 | -1.97488800 | 0.00050600  |
| H | -2.30626900 | -3.33027700 | 0.00062000  |
| H | -0.09916000 | -2.25483800 | 0.00037000  |
| C | -0.45099600 | 2.09528300  | -0.00017400 |
| O | 0.08603900  | 3.18862200  | -0.00032400 |
| N | -1.80508500 | 1.86612900  | -0.00014100 |
| H | -2.49327400 | 2.60702100  | -0.00014400 |
| C | 1.55152300  | 0.70959200  | -0.00015800 |
| H | 1.99823400  | 1.70627600  | -0.00026400 |
| C | 2.52233700  | -0.44980400 | -0.00013600 |

|   |            |             |             |
|---|------------|-------------|-------------|
| C | 2.33139700 | -1.29610000 | 1.26907000  |
| H | 3.01515600 | -2.15153000 | 1.25165800  |
| H | 2.55290700 | -0.70076700 | 2.16038500  |
| H | 1.31140700 | -1.67340500 | 1.36670700  |
| C | 2.33127100 | -1.29628200 | -1.26919800 |
| H | 2.55276000 | -0.70109600 | -2.16061700 |
| H | 3.01498600 | -2.15174500 | -1.25169900 |
| H | 1.31125800 | -1.67354900 | -1.36672300 |
| C | 3.95126500 | 0.10876100  | -0.00025500 |
| H | 4.13060800 | 0.72546600  | 0.88658600  |
| H | 4.67888800 | -0.70899600 | -0.00019800 |
| H | 4.13053400 | 0.72527600  | -0.88724300 |

## RC

|   |             |             |             |
|---|-------------|-------------|-------------|
| C | 1.61555500  | -1.15435400 | 0.56748100  |
| C | 0.35349700  | -1.38384800 | 1.16476500  |
| C | -0.39228100 | -2.53292100 | 0.93928400  |
| C | 0.12571300  | -3.48396800 | 0.05719500  |
| C | 1.35572600  | -3.27662800 | -0.56242100 |
| C | 2.10304300  | -2.12233200 | -0.30855600 |
| C | 2.07787000  | 0.16577800  | 1.05700600  |
| H | -1.34433500 | -2.68122400 | 1.44109300  |
| H | -0.43759100 | -4.38992300 | -0.14226800 |
| H | 1.74710700  | -4.01915700 | -1.24947300 |
| H | 3.05205600  | -1.99779700 | -0.80884300 |
| C | 0.96476300  | 0.67164500  | 1.95629100  |
| O | 0.91158400  | 1.72404400  | 2.56592500  |
| N | -0.00228800 | -0.30314200 | 1.96390500  |
| H | -0.86814300 | -0.22188100 | 2.48113700  |
| C | 3.13221200  | 0.99484600  | 0.94504700  |
| H | 2.98091500  | 1.91421900  | 1.51796500  |
| C | 4.46701600  | 0.99048700  | 0.25154900  |
| C | 4.83394200  | -0.29805300 | -0.47625500 |
| H | 5.86056600  | -0.22195400 | -0.84929000 |
| H | 4.18290500  | -0.45968000 | -1.33909500 |
| H | 4.78250700  | -1.16312000 | 0.19204900  |
| C | 5.52373400  | 1.27700400  | 1.33478500  |
| H | 5.30255300  | 2.20603500  | 1.86971900  |
| H | 6.50975600  | 1.37574800  | 0.86941900  |
| H | 5.56743200  | 0.46215700  | 2.06435000  |
| C | 4.45134500  | 2.15779000  | -0.75288800 |
| H | 3.70570300  | 1.98577100  | -1.53548700 |
| H | 5.43431200  | 2.24747900  | -1.22740200 |
| H | 4.22253700  | 3.10608200  | -0.25610200 |
| C | -4.14788400 | 1.25797600  | -0.44738300 |

|   |             |             |             |
|---|-------------|-------------|-------------|
| C | -3.77081600 | -0.03579300 | -0.00543700 |
| C | -4.66060300 | -0.89453200 | 0.64926400  |
| C | -5.94929800 | -0.43325200 | 0.86327900  |
| C | -6.34705500 | 0.85049600  | 0.43623400  |
| C | -5.46324800 | 1.69555200  | -0.21418000 |
| C | -2.99066500 | 1.83294500  | -1.07368100 |
| H | -4.35026600 | -1.88285900 | 0.97461600  |
| H | -6.66663400 | -1.07201600 | 1.36894400  |
| H | -7.36518200 | 1.17789100  | 0.62209200  |
| H | -5.77891300 | 2.68239100  | -0.54013400 |
| N | -2.45137600 | -0.21593100 | -0.34401100 |
| C | -1.98178300 | 0.90939900  | -0.98895500 |
| H | -2.90808200 | 2.81130200  | -1.52590600 |
| C | -0.56559700 | 0.99666500  | -1.45786600 |
| H | 0.12089900  | 1.07817200  | -0.60693200 |
| H | -0.44980200 | 1.90224500  | -2.05807900 |
| H | -1.91590000 | -1.05893000 | -0.18064500 |
| C | -0.15875900 | -0.22217200 | -2.29466300 |
| H | -0.21124200 | -1.14814900 | -1.71118200 |
| H | -0.80269000 | -0.32498200 | -3.17176400 |
| C | 2.28866400  | 0.05434800  | -3.11514400 |
| N | 1.18885200  | -0.08130400 | -2.74485300 |

### TS1

|   |             |             |             |
|---|-------------|-------------|-------------|
| C | -1.49130600 | 1.15748900  | -0.12588800 |
| C | -0.75777100 | 1.94436900  | 0.80742200  |
| C | 0.33091600  | 2.72025800  | 0.44267900  |
| C | 0.73704700  | 2.69505800  | -0.89688300 |
| C | 0.08185400  | 1.87802700  | -1.81998300 |
| C | -1.02110600 | 1.10315000  | -1.44120400 |
| C | -2.52086900 | 0.46541000  | 0.62995800  |
| H | 0.86009200  | 3.31450800  | 1.18093500  |
| H | 1.58084900  | 3.30188800  | -1.21074500 |
| H | 0.42734600  | 1.84294200  | -2.84842100 |
| H | -1.49944600 | 0.46620600  | -2.17540100 |
| C | -2.30473500 | 0.79256300  | 2.04544300  |
| O | -2.89229300 | 0.37932400  | 3.04260300  |
| N | -1.28386900 | 1.73665100  | 2.07192100  |
| H | -0.92607400 | 2.14030300  | 2.92662600  |
| C | -3.46803300 | -0.52560400 | 0.33144500  |
| H | -3.89412900 | -0.91853600 | 1.26014700  |
| C | -4.53053500 | -0.53792900 | -0.76949100 |
| C | -4.00336700 | -0.20345100 | -2.16161100 |
| H | -4.82054200 | -0.26947700 | -2.88719200 |
| H | -3.22461000 | -0.91032100 | -2.47093400 |

|   |             |             |             |
|---|-------------|-------------|-------------|
| H | -3.60116200 | 0.81189500  | -2.20170700 |
| C | -5.54275200 | 0.54063800  | -0.33922400 |
| H | -5.94667700 | 0.33098400  | 0.65674500  |
| H | -6.37625300 | 0.56270300  | -1.04860300 |
| H | -5.07606300 | 1.52936800  | -0.31954900 |
| C | -5.23828000 | -1.89446500 | -0.79790100 |
| H | -4.57309800 | -2.68274200 | -1.16363600 |
| H | -6.10536600 | -1.84655900 | -1.46359400 |
| H | -5.58871300 | -2.17879200 | 0.20015300  |
| C | 4.49704800  | -1.09080700 | 0.40596300  |
| C | 3.94860700  | 0.02425300  | -0.27962700 |
| C | 4.74846200  | 0.98239900  | -0.91287000 |
| C | 6.12100400  | 0.80582000  | -0.85426400 |
| C | 6.68943500  | -0.29595400 | -0.18152000 |
| C | 5.89449600  | -1.24023500 | 0.44619800  |
| C | 3.38862000  | -1.84075200 | 0.92679000  |
| H | 4.30537500  | 1.82804100  | -1.42964400 |
| H | 6.77222400  | 1.52898600  | -1.33520800 |
| H | 7.76956200  | -0.40132700 | -0.15747800 |
| H | 6.34125900  | -2.08484700 | 0.96278400  |
| N | 2.58254600  | -0.06053500 | -0.17441100 |
| C | 2.24651700  | -1.17887900 | 0.55738400  |
| H | 3.42772900  | -2.75365200 | 1.50457200  |
| C | 0.80910900  | -1.51641900 | 0.77689300  |
| H | 0.24521800  | -0.60740200 | 1.01527200  |
| H | 0.70880800  | -2.20857800 | 1.61551900  |
| H | 1.91894200  | 0.61803500  | -0.53399400 |
| C | 0.20657700  | -2.15268800 | -0.48716400 |
| H | 0.44243200  | -1.55987000 | -1.37540800 |
| H | 0.57728900  | -3.16915300 | -0.63265700 |
| C | -2.34727900 | -1.98753300 | -0.15014200 |
| N | -1.21990600 | -2.18861600 | -0.37234400 |

### IM1

|   |             |             |             |
|---|-------------|-------------|-------------|
| C | 1.59986300  | 1.13240000  | 0.29833100  |
| C | 1.24021100  | 2.34235300  | -0.37821800 |
| C | 0.16325300  | 3.12034700  | 0.01482800  |
| C | -0.60155800 | 2.69715500  | 1.11107500  |
| C | -0.27587600 | 1.51681800  | 1.78587800  |
| C | 0.81193700  | 0.73164200  | 1.38841000  |
| C | 2.71571000  | 0.58082400  | -0.40924800 |
| H | -0.08619700 | 4.03017300  | -0.52337100 |
| H | -1.44586200 | 3.29591400  | 1.43868000  |
| H | -0.87279600 | 1.20398400  | 2.63854600  |
| H | 1.04736200  | -0.17727500 | 1.93561500  |



|   |             |             |             |
|---|-------------|-------------|-------------|
| C | 2.99472600  | 1.41617700  | -1.53899500 |
| O | 3.82096600  | 1.28055500  | -2.45489900 |
| N | 2.11096600  | 2.50388200  | -1.43706100 |
| H | 2.07391900  | 3.24625000  | -2.12060100 |
| C | 3.33099300  | -0.78290600 | -0.33623100 |
| H | 3.81536800  | -0.96002600 | -1.30843600 |
| C | 4.35193500  | -1.15011100 | 0.78037500  |
| C | 3.74611800  | -0.94030700 | 2.16719500  |
| H | 4.48834500  | -1.17565000 | 2.93664000  |
| H | 2.88085900  | -1.59474300 | 2.33033800  |
| H | 3.42876600  | 0.09773700  | 2.30441600  |
| C | 5.55649800  | -0.22689000 | 0.59220200  |
| H | 6.00319300  | -0.35880600 | -0.39896600 |
| H | 6.31790200  | -0.45124400 | 1.34565300  |
| H | 5.26336300  | 0.82166300  | 0.69833300  |
| C | 4.77333700  | -2.60992100 | 0.60283500  |
| H | 3.92178800  | -3.29032700 | 0.72598500  |
| H | 5.52423300  | -2.88101900 | 1.35123400  |
| H | 5.20484200  | -2.77815600 | -0.38963400 |
| C | -4.66815000 | -1.00351800 | -0.58871100 |
| C | -4.13557700 | 0.05642000  | 0.19047100  |
| C | -4.94309900 | 0.89747400  | 0.96517900  |
| C | -6.30673000 | 0.65704800  | 0.95431700  |
| C | -6.85944100 | -0.39308900 | 0.19100600  |
| C | -6.05764200 | -1.22032200 | -0.57683500 |
| C | -3.55702300 | -1.63039700 | -1.24756900 |
| H | -4.51115900 | 1.70432600  | 1.54935900  |
| H | -6.96366300 | 1.28838400  | 1.54437900  |
| H | -7.93331500 | -0.55066000 | 0.20812200  |
| H | -6.49247900 | -2.02474100 | -1.16301600 |
| N | -2.77534800 | 0.05539700  | 0.01026500  |
| C | -2.42911800 | -0.95222200 | -0.86287400 |
| H | -3.58629800 | -2.47345000 | -1.92385600 |
| C | -0.98922300 | -1.18516000 | -1.18421900 |
| H | -0.44290800 | -0.23776500 | -1.11876000 |
| H | -0.87764400 | -1.57651100 | -2.19733100 |
| H | -2.12211500 | 0.72765000  | 0.40141100  |
| C | -0.37039500 | -2.17643000 | -0.18213200 |
| H | -0.65093300 | -1.92741500 | 0.84502800  |
| H | -0.64923400 | -3.20871600 | -0.39502100 |
| C | 2.12758200  | -1.62402300 | -0.30846500 |
| N | 1.06251800  | -2.06130700 | -0.23708900 |

**IM2**

|   |             |             |            |
|---|-------------|-------------|------------|
| C | -0.88815100 | -1.07733200 | 0.89106900 |
|---|-------------|-------------|------------|

|   |             |             |             |
|---|-------------|-------------|-------------|
| C | 0.06880000  | -2.14227200 | 0.82734100  |
| C | 0.78001100  | -2.56708300 | 1.93874300  |
| C | 0.56439500  | -1.91454700 | 3.16172500  |
| C | -0.35923300 | -0.86998000 | 3.24935700  |
| C | -1.09014400 | -0.45145300 | 2.13123900  |
| C | -1.36494400 | -0.87579000 | -0.43840500 |
| H | 1.49897400  | -3.37779000 | 1.85711700  |
| H | 1.11781800  | -2.22723000 | 4.04109700  |
| H | -0.51845100 | -0.37383800 | 4.20260000  |
| H | -1.80422900 | 0.36227300  | 2.22941200  |
| C | -0.67438400 | -1.76942500 | -1.31440000 |
| O | -0.72995400 | -1.89242500 | -2.54897500 |
| N | 0.14393600  | -2.55850100 | -0.48513700 |
| H | 0.79178600  | -3.24254200 | -0.84846900 |
| C | -2.20048200 | 0.22088800  | -1.01823900 |
| H | -1.95881300 | 0.26004300  | -2.09216200 |
| C | -3.75628600 | 0.18467400  | -0.88556600 |
| C | -4.17402300 | 0.15642000  | 0.58403900  |
| H | -5.26448500 | 0.09858300  | 0.66086500  |
| H | -3.85231100 | 1.06365200  | 1.11051200  |
| H | -3.74785700 | -0.71148500 | 1.09612900  |
| C | -4.22739200 | -1.08938300 | -1.58745100 |
| H | -3.92420200 | -1.09474100 | -2.63952700 |
| H | -5.31907600 | -1.15438100 | -1.54259000 |
| H | -3.80763700 | -1.97728100 | -1.10635300 |
| C | -4.34541000 | 1.41409200  | -1.58047400 |
| H | -4.02277100 | 2.34383100  | -1.09620200 |
| H | -5.43850000 | 1.38374600  | -1.53964100 |
| H | -4.04465600 | 1.45395200  | -2.63279700 |
| C | 3.13666300  | 1.26494400  | -0.80161800 |
| C | 2.77669200  | 0.15697000  | 0.00859400  |
| C | 3.29512800  | -1.12631500 | -0.20669300 |
| C | 4.18149000  | -1.28767900 | -1.25775600 |
| C | 4.55206600  | -0.20080100 | -2.07817600 |
| C | 4.04206200  | 1.06689300  | -1.86006600 |
| C | 2.42335100  | 2.39880900  | -0.29038800 |
| H | 3.00821700  | -1.95606600 | 0.43122900  |
| H | 4.60063700  | -2.26948300 | -1.45486400 |
| H | 5.24961100  | -0.36699000 | -2.89320600 |
| H | 4.33335100  | 1.89846200  | -2.49529200 |
| N | 1.89390900  | 0.61102800  | 0.95679200  |
| C | 1.68024500  | 1.95784400  | 0.77655100  |
| H | 2.45662800  | 3.41349400  | -0.66310900 |
| C | 0.71702300  | 2.70436500  | 1.64856400  |
| H | 1.21716000  | 3.52764800  | 2.16714700  |

|   |             |            |             |
|---|-------------|------------|-------------|
| H | 0.30064300  | 2.03482500 | 2.40604400  |
| H | 1.43497800  | 0.03975600 | 1.65913500  |
| C | -0.42523900 | 3.33049900 | 0.84211100  |
| H | -1.14827000 | 3.83213200 | 1.48805700  |
| H | -0.05370000 | 4.03875800 | 0.09877400  |
| C | -1.63968700 | 1.44534800 | -0.44110300 |
| N | -1.13792100 | 2.31346700 | 0.12176000  |

## TS2

|   |             |             |             |
|---|-------------|-------------|-------------|
| C | 0.03959800  | 0.98462200  | -1.24827400 |
| C | -1.16770000 | 0.86167400  | -2.01431400 |
| C | -1.94377200 | 1.95665800  | -2.35964200 |
| C | -1.52244700 | 3.23155000  | -1.95447400 |
| C | -0.33199200 | 3.38301100  | -1.23800200 |
| C | 0.45484800  | 2.27984100  | -0.89221300 |
| C | 0.51651400  | -0.33798900 | -1.01725200 |
| H | -2.85970900 | 1.82470200  | -2.92970200 |
| H | -2.11628600 | 4.10185500  | -2.21541500 |
| H | -0.00244700 | 4.37850800  | -0.95190200 |
| H | 1.38480400  | 2.43174700  | -0.34987700 |
| C | -0.38221100 | -1.26228600 | -1.62839700 |
| O | -0.37103800 | -2.50617700 | -1.65536300 |
| N | -1.35850500 | -0.47875000 | -2.27444800 |
| H | -2.17869300 | -0.88139800 | -2.70366300 |
| C | 1.57686900  | -0.84817000 | -0.09695000 |
| H | 1.25400000  | -1.84657500 | 0.23284600  |
| C | 3.03451900  | -1.00613300 | -0.67096800 |
| C | 3.56670600  | 0.32579300  | -1.19879400 |
| H | 4.54000500  | 0.17181400  | -1.67659100 |
| H | 3.70290800  | 1.05790000  | -0.39594700 |
| H | 2.88393200  | 0.74698000  | -1.94337600 |
| C | 2.92599400  | -2.00717600 | -1.82583300 |
| H | 2.51924600  | -2.96314300 | -1.48273600 |
| H | 3.91937100  | -2.18171700 | -2.25246200 |
| H | 2.26887400  | -1.62642900 | -2.61157500 |
| C | 3.96907200  | -1.57278400 | 0.40072300  |
| H | 4.11739500  | -0.87145600 | 1.22789100  |
| H | 4.95137400  | -1.78253300 | -0.03444800 |
| H | 3.57470400  | -2.51031400 | 0.80849300  |
| C | -1.34464300 | -1.14120900 | 1.67107100  |
| C | -2.19353000 | -0.16500400 | 1.10451400  |
| C | -3.34292400 | -0.49198700 | 0.38649300  |
| C | -3.63571400 | -1.84163700 | 0.25048700  |
| C | -2.80924800 | -2.83199100 | 0.81311500  |
| C | -1.66488000 | -2.49689400 | 1.52002100  |

|   |             |             |             |
|---|-------------|-------------|-------------|
| C | -0.27318200 | -0.42872200 | 2.32621800  |
| H | -3.97167300 | 0.27841200  | -0.04854100 |
| H | -4.52196200 | -2.13989300 | -0.30077200 |
| H | -3.07239600 | -3.87671500 | 0.68287600  |
| H | -1.02851300 | -3.26572300 | 1.94768000  |
| N | -1.67545500 | 1.07749600  | 1.42581100  |
| C | -0.55182000 | 0.93370600  | 2.16761800  |
| H | 0.41957500  | -0.84190500 | 3.04951700  |
| C | 0.24658900  | 2.09634100  | 2.63684400  |
| H | -0.10775000 | 2.43191300  | 3.61750100  |
| H | 0.12438100  | 2.92489200  | 1.93266100  |
| H | -1.98491700 | 1.95502200  | 1.02348800  |
| C | 1.73299600  | 1.73916700  | 2.79572400  |
| H | 2.34539400  | 2.63983200  | 2.80686900  |
| H | 1.92144300  | 1.18014800  | 3.71655400  |
| C | 1.60843600  | 0.01744500  | 1.09945200  |
| N | 2.15349900  | 0.89361500  | 1.69585500  |

### IM3

|   |             |             |             |
|---|-------------|-------------|-------------|
| C | 0.09408800  | 0.75674400  | 1.34930000  |
| C | 1.32538300  | 0.47565300  | 2.03235000  |
| C | 2.15530000  | 1.47440400  | 2.51981500  |
| C | 1.76855500  | 2.81008300  | 2.34775100  |
| C | 0.56214400  | 3.11411200  | 1.70874300  |
| C | -0.27736900 | 2.10925000  | 1.22056300  |
| C | -0.46302200 | -0.49561300 | 0.94902200  |
| H | 3.08295900  | 1.22057200  | 3.02625300  |
| H | 2.40232700  | 3.60658800  | 2.72494900  |
| H | 0.26099200  | 4.15313000  | 1.60087400  |
| H | -1.21787900 | 2.37202200  | 0.74348400  |
| C | 0.40579800  | -1.53385200 | 1.40506500  |
| O | 0.33096800  | -2.77042200 | 1.27615200  |
| N | 1.47135300  | -0.89354100 | 2.06751900  |
| H | 2.24562600  | -1.39623200 | 2.47550400  |
| C | -1.56968600 | -0.80752600 | -0.01824400 |
| H | -1.32293100 | -1.80982900 | -0.40364100 |
| C | -3.00715500 | -0.92544100 | 0.56789200  |
| C | -3.44717400 | 0.33877800  | 1.31305900  |
| H | -4.42030600 | 0.16942700  | 1.78925600  |
| H | -3.53854700 | 1.19166600  | 0.63723500  |
| H | -2.72835600 | 0.59196100  | 2.09966400  |
| C | -2.98310600 | -2.08969900 | 1.56758300  |
| H | -2.66976400 | -3.02121000 | 1.08453100  |
| H | -3.98092600 | -2.24011200 | 1.99483200  |
| H | -2.28293900 | -1.88946900 | 2.38370900  |

|   |             |             |             |
|---|-------------|-------------|-------------|
| C | -4.01166300 | -1.26141600 | -0.54066100 |
| H | -4.12976600 | -0.43335600 | -1.24335600 |
| H | -4.99391300 | -1.48208200 | -0.10782500 |
| H | -3.69010100 | -2.14731400 | -1.10190700 |
| C | 1.04210600  | -0.90442000 | -1.60199600 |
| C | 2.13476800  | -0.09195800 | -1.27367100 |
| C | 3.36412600  | -0.57388800 | -0.86582500 |
| C | 3.48879500  | -1.96287900 | -0.80427300 |
| C | 2.42485900  | -2.79841400 | -1.15317100 |
| C | 1.19430600  | -2.28236500 | -1.56354200 |
| C | -0.08261600 | -0.00837900 | -2.02979300 |
| H | 4.18136700  | 0.09227000  | -0.61154900 |
| H | 4.43078800  | -2.39802300 | -0.48794800 |
| H | 2.55507600  | -3.87389500 | -1.09688900 |
| H | 0.37588500  | -2.94363300 | -1.82573000 |
| N | 1.74314500  | 1.25676600  | -1.47083400 |
| C | 0.53429500  | 1.34273300  | -1.93902000 |
| H | -0.42475500 | -0.19904200 | -3.05777700 |
| C | -0.26345600 | 2.55280100  | -2.20988400 |
| H | 0.12014400  | 3.05669500  | -3.10412900 |
| H | -0.16479700 | 3.24316800  | -1.36504100 |
| H | 2.32065200  | 2.06015500  | -1.22627900 |
| C | -1.72229300 | 2.10996200  | -2.41972600 |
| H | -2.37639500 | 2.98150900  | -2.37841000 |
| H | -1.82634900 | 1.66579600  | -3.41864900 |
| C | -1.38996700 | 0.15400400  | -1.17417500 |
| N | -2.14563000 | 1.14771400  | -1.40573400 |

### TS3

|   |             |             |             |
|---|-------------|-------------|-------------|
| C | -2.43456500 | 0.09515400  | -0.38137700 |
| C | -3.02533900 | -1.00207900 | -1.08047800 |
| C | -4.38477100 | -1.29299400 | -1.04016600 |
| C | -5.20231600 | -0.49820700 | -0.23976600 |
| C | -4.64875200 | 0.54734100  | 0.50939600  |
| C | -3.28848200 | 0.84173400  | 0.45193500  |
| C | -1.02199600 | 0.08947200  | -0.68577100 |
| H | -4.78557100 | -2.13055900 | -1.60400100 |
| H | -6.26658800 | -0.70477100 | -0.18328400 |
| H | -5.28950000 | 1.13766400  | 1.15809800  |
| H | -2.88963100 | 1.62883400  | 1.07812900  |
| C | -0.78336000 | -1.07510900 | -1.45678100 |
| O | 0.29717500  | -1.63858000 | -1.84424100 |
| N | -2.01456500 | -1.67383200 | -1.72169700 |
| H | -2.10551500 | -2.52714200 | -2.25320600 |
| C | 0.11557000  | 0.93666600  | -0.16332400 |

|   |             |             |             |
|---|-------------|-------------|-------------|
| H | 0.99387200  | 0.57601800  | -0.71357400 |
| C | 0.12209700  | 2.47381200  | -0.41666200 |
| C | -1.00035600 | 3.22847800  | 0.29739300  |
| H | -0.83148900 | 4.30731200  | 0.20461600  |
| H | -1.03878900 | 2.98308600  | 1.36414600  |
| H | -1.97237600 | 3.00825400  | -0.14825400 |
| C | 0.00109600  | 2.70823200  | -1.92496900 |
| H | 0.80586100  | 2.19941100  | -2.46795500 |
| H | 0.06285500  | 3.77903300  | -2.14848800 |
| H | -0.95381700 | 2.33313600  | -2.30478600 |
| C | 1.46788600  | 3.02980600  | 0.06432600  |
| H | 1.61344500  | 2.85673700  | 1.13828800  |
| H | 1.51403600  | 4.11064600  | -0.10590200 |
| H | 2.30041200  | 2.56623800  | -0.47410100 |
| C | 2.84543800  | -0.21887600 | 0.66963300  |
| C | 2.65873800  | -1.30944600 | -0.17941800 |
| C | 3.46248700  | -1.55744500 | -1.28150800 |
| C | 4.52336500  | -0.67884800 | -1.48713800 |
| C | 4.75342900  | 0.39960700  | -0.62345800 |
| C | 3.91328700  | 0.64686100  | 0.46142300  |
| C | 1.73935300  | -0.25899600 | 1.65719600  |
| H | 3.27251400  | -2.39507000 | -1.94314000 |
| H | 5.18764400  | -0.83635800 | -2.33041500 |
| H | 5.59623900  | 1.05754900  | -0.80754300 |
| H | 4.08297200  | 1.49493800  | 1.11696000  |
| N | 1.54232500  | -2.06487200 | 0.26768200  |
| C | 1.08854700  | -1.55824900 | 1.39571600  |
| H | 1.97095900  | -0.00864600 | 2.69261500  |
| C | -0.03447200 | -1.97642200 | 2.27733500  |
| H | 0.32333300  | -2.76518400 | 2.94907100  |
| H | -0.86942500 | -2.37630700 | 1.69509600  |
| H | 0.91597100  | -2.39875300 | -0.53670900 |
| C | -0.45839100 | -0.72169900 | 3.08258900  |
| H | -1.42072100 | -0.89276000 | 3.56567000  |
| H | 0.27643000  | -0.50619800 | 3.86918900  |
| C | 0.35390400  | 0.50283100  | 1.29481200  |
| N | -0.59131800 | 0.38181600  | 2.13084200  |

#### IM4

|   |             |            |             |
|---|-------------|------------|-------------|
| C | -0.07316000 | 0.84876800 | -1.33593600 |
| C | -1.23885900 | 0.65659100 | -2.12341100 |
| C | -1.97309100 | 1.71173300 | -2.66205000 |
| C | -1.52661700 | 3.00111500 | -2.40509600 |
| C | -0.36803200 | 3.22241700 | -1.64051600 |
| C | 0.36254500  | 2.16681000 | -1.11149300 |

|   |             |             |             |
|---|-------------|-------------|-------------|
| C | 0.40668900  | -0.45974400 | -0.94904700 |
| H | -2.86114600 | 1.52473200  | -3.25776600 |
| H | -2.07638600 | 3.84704900  | -2.80502200 |
| H | -0.03408500 | 4.24058300  | -1.46465000 |
| H | 1.26099400  | 2.35529700  | -0.53257700 |
| C | -0.46881700 | -1.34914800 | -1.52989900 |
| O | -0.50869600 | -2.69000800 | -1.52119400 |
| N | -1.45009400 | -0.70351200 | -2.22369700 |
| H | -2.19432300 | -1.16359700 | -2.72952300 |
| C | 1.49190900  | -0.83855000 | 0.03372700  |
| H | 1.23702700  | -1.84178700 | 0.41458000  |
| C | 2.91671200  | -0.98248900 | -0.57602800 |
| C | 3.37332100  | 0.27934600  | -1.31521700 |
| H | 4.35198900  | 0.10231600  | -1.77580200 |
| H | 3.46043900  | 1.12756000  | -0.63330300 |
| H | 2.67075900  | 0.54195800  | -2.11296400 |
| C | 2.86212500  | -2.14320900 | -1.57989800 |
| H | 2.57167000  | -3.07970900 | -1.08584700 |
| H | 3.84742500  | -2.29931700 | -2.03107400 |
| H | 2.15103600  | -1.94259300 | -2.38788100 |
| C | 3.92627200  | -1.34550000 | 0.51913000  |
| H | 4.08056800  | -0.51714200 | 1.21305800  |
| H | 4.89162100  | -1.59965000 | 0.06814900  |
| H | 3.58667000  | -2.21751700 | 1.09132400  |
| C | -1.09065200 | -0.92558800 | 1.65277700  |
| C | -2.14899700 | -0.02965800 | 1.41212400  |
| C | -3.38023900 | -0.47341300 | 0.94955900  |
| C | -3.54832100 | -1.84707600 | 0.75564600  |
| C | -2.51703700 | -2.74449500 | 1.03686300  |
| C | -1.27624300 | -2.29017300 | 1.49665800  |
| C | 0.06811200  | -0.09085600 | 2.10362300  |
| H | -4.18163000 | 0.23150100  | 0.75260200  |
| H | -4.50028500 | -2.22320900 | 0.39391600  |
| H | -2.67714200 | -3.80799100 | 0.89027300  |
| H | -0.47737400 | -2.99504500 | 1.71261400  |
| N | -1.78784200 | 1.31536900  | 1.68927400  |
| C | -0.57295200 | 1.28594300  | 2.10775700  |
| H | 0.41332100  | -0.35461200 | 3.11447300  |
| C | 0.30397300  | 2.44619400  | 2.43907500  |
| H | -0.01653300 | 2.91730300  | 3.37424000  |
| H | 0.22232400  | 3.19729600  | 1.64686100  |
| H | 0.18682200  | -3.02541600 | -0.93497400 |
| C | 1.75166400  | 1.94112500  | 2.57446200  |
| H | 2.44522500  | 2.78353400  | 2.58584800  |
| H | 1.86331400  | 1.41280800  | 3.53127600  |

|   |            |            |            |
|---|------------|------------|------------|
| C | 1.32698500 | 0.08139200 | 1.23299400 |
| N | 2.12415300 | 1.04192800 | 1.47969200 |

### IM5

|   |             |             |             |
|---|-------------|-------------|-------------|
| C | 2.41711200  | 0.50855600  | -0.14042800 |
| C | 3.46389600  | 0.01671400  | -0.97525300 |
| C | 4.42589200  | 0.82931100  | -1.57146600 |
| C | 4.35012000  | 2.19541100  | -1.34453900 |
| C | 3.33267700  | 2.72018300  | -0.53309800 |
| C | 2.38307100  | 1.90244300  | 0.06483900  |
| C | 1.64505800  | -0.64582500 | 0.28995000  |
| H | 5.20212000  | 0.39613400  | -2.19482200 |
| H | 5.08029400  | 2.85899400  | -1.79613300 |
| H | 3.28539800  | 3.79130200  | -0.36277400 |
| H | 1.62815400  | 2.35628400  | 0.69199800  |
| C | 2.24627300  | -1.72633300 | -0.33256800 |
| O | 1.92828100  | -3.02841900 | -0.30771400 |
| N | 3.32615000  | -1.35039000 | -1.07041300 |
| H | 3.90542100  | -1.97965200 | -1.60911400 |
| C | 0.39958500  | -0.96936200 | 1.09737400  |
| H | 0.61408300  | -1.97304300 | 1.47722800  |
| C | 0.03680800  | -0.25997500 | 2.45168000  |
| C | 0.31880100  | 1.23661000  | 2.56536200  |
| H | -0.01384100 | 1.58129400  | 3.55087300  |
| H | -0.21074600 | 1.82843800  | 1.81962800  |
| H | 1.39086000  | 1.43696500  | 2.49605900  |
| C | 0.89365500  | -0.94507300 | 3.53114800  |
| H | 0.63044900  | -2.00331400 | 3.63363400  |
| H | 0.74658500  | -0.46153800 | 4.50243200  |
| H | 1.95805400  | -0.88046800 | 3.27816300  |
| C | -1.44221600 | -0.52309900 | 2.75812300  |
| H | -2.09656700 | 0.00222700  | 2.05209800  |
| H | -1.68318600 | -0.16948800 | 3.76602000  |
| H | -1.67464000 | -1.59216700 | 2.70776900  |
| C | -1.87626600 | 0.99074800  | -0.56595700 |
| C | -3.26525900 | 0.95334400  | -0.77967400 |
| C | -4.06501900 | 2.07179100  | -0.58777500 |
| C | -3.44048100 | 3.26412700  | -0.21641500 |
| C | -2.05290700 | 3.33211900  | -0.08635300 |
| C | -1.25863700 | 2.19675800  | -0.28039000 |
| C | -1.35273200 | -0.37574600 | -0.92323800 |
| H | -5.13608300 | 2.01745000  | -0.75365400 |
| H | -4.03796500 | 4.15707000  | -0.06177400 |
| H | -1.58034800 | 4.27949900  | 0.15271100  |
| H | -0.17829400 | 2.26814900  | -0.23459300 |



|   |             |             |             |
|---|-------------|-------------|-------------|
| N | -3.69301700 | -0.30054900 | -1.29008600 |
| C | -2.63331500 | -1.01540700 | -1.42206700 |
| H | -0.60901300 | -0.30543900 | -1.73003800 |
| C | -2.56649800 | -2.42033200 | -1.88099700 |
| H | -1.89468800 | -2.47816200 | -2.74444000 |
| H | -3.55058400 | -2.79361400 | -2.16982800 |
| H | 0.99413100  | -3.13348200 | -0.03542400 |
| C | -1.98145900 | -3.24914700 | -0.72433700 |
| H | -2.78514100 | -3.53115900 | -0.03445700 |
| H | -1.55447000 | -4.18139000 | -1.10315100 |
| C | -0.72990200 | -1.34100100 | 0.11477800  |
| N | -0.96824300 | -2.59826600 | 0.09065500  |

#### TS4

|   |             |             |             |
|---|-------------|-------------|-------------|
| C | 2.18194600  | -0.00364000 | -0.20758800 |
| C | 2.86586300  | -0.11925900 | -1.43835700 |
| C | 4.01749400  | 0.58508300  | -1.76538700 |
| C | 4.52568900  | 1.45066000  | -0.80639900 |
| C | 3.87481800  | 1.59910900  | 0.42375700  |
| C | 2.71367900  | 0.89541100  | 0.72561200  |
| C | 0.96001400  | -0.84432700 | -0.30694800 |
| H | 4.49078500  | 0.45545100  | -2.73297700 |
| H | 5.42652600  | 2.01758600  | -1.01581100 |
| H | 4.27791700  | 2.28518700  | 1.16150000  |
| H | 2.23977500  | 1.06298600  | 1.68147600  |
| C | 1.10770600  | -1.47280200 | -1.58820600 |
| O | 0.32695200  | -2.35754200 | -2.17222400 |
| N | 2.17788500  | -1.02805400 | -2.24254500 |
| H | 2.41086200  | -1.27596700 | -3.19814400 |
| C | 0.02653400  | -1.67011800 | 0.62467700  |
| H | 0.17581000  | -2.70574300 | 0.30420100  |
| C | 0.08146100  | -1.77836900 | 2.19859300  |
| C | 1.35134000  | -1.20338000 | 2.82457400  |
| H | 1.45187200  | -1.58554300 | 3.84610400  |
| H | 1.31014200  | -0.11508300 | 2.89547000  |
| H | 2.24960300  | -1.48755800 | 2.26780100  |
| C | 0.04049700  | -3.28524900 | 2.51057800  |
| H | -0.82906400 | -3.75563700 | 2.03849500  |
| H | -0.02606200 | -3.44791900 | 3.59109200  |
| H | 0.94307300  | -3.78562600 | 2.14245700  |
| C | -1.15087900 | -1.15214000 | 2.86847700  |
| H | -1.26097900 | -0.08832500 | 2.65165200  |
| H | -1.06440000 | -1.26539700 | 3.95431900  |
| H | -2.06921800 | -1.65888800 | 2.55408900  |
| C | -1.34791700 | 1.44308800  | 0.32991600  |

|   |             |             |             |
|---|-------------|-------------|-------------|
| C | -2.13711800 | 2.32537200  | -0.45713900 |
| C | -2.14829300 | 3.69853900  | -0.20805800 |
| C | -1.36448000 | 4.19613900  | 0.82745900  |
| C | -0.57135800 | 3.33455500  | 1.59789200  |
| C | -0.54949200 | 1.96427900  | 1.35115000  |
| C | -1.53360500 | 0.12746400  | -0.29630100 |
| H | -2.76035000 | 4.35399300  | -0.82078200 |
| H | -1.36233800 | 5.26083800  | 1.03957800  |
| H | 0.03839200  | 3.74007700  | 2.39964400  |
| H | 0.07596500  | 1.31617300  | 1.95417000  |
| N | -2.85273300 | 1.65473700  | -1.45295500 |
| C | -2.51197900 | 0.39645900  | -1.33210900 |
| H | -0.12022500 | -0.01536300 | -0.68878100 |
| C | -3.10668800 | -0.75186500 | -2.08221700 |
| H | -2.41713000 | -1.10139800 | -2.86248700 |
| H | -4.04184900 | -0.45846000 | -2.56424300 |
| H | -0.44742400 | -2.58555600 | -1.61217900 |
| C | -3.33177500 | -1.88031100 | -1.06734900 |
| H | -4.07121900 | -1.56205000 | -0.32073400 |
| H | -3.72194000 | -2.77287900 | -1.56104000 |
| C | -1.35571400 | -1.29244000 | 0.07238900  |
| N | -2.08809300 | -2.24641400 | -0.37895200 |

## IM6

|   |            |             |             |
|---|------------|-------------|-------------|
| C | 2.53805800 | 0.41511700  | -0.23395100 |
| C | 3.31163600 | 0.11910400  | -1.36740000 |
| C | 4.63560500 | 0.51241100  | -1.49857500 |
| C | 5.19394400 | 1.25639100  | -0.45831400 |
| C | 4.43389000 | 1.60882900  | 0.65485700  |
| C | 3.10025000 | 1.20106900  | 0.76276200  |
| C | 1.12994200 | -0.09834700 | -0.46730800 |
| H | 5.20606700 | 0.26144500  | -2.38664700 |
| H | 6.22836200 | 1.57724000  | -0.52980700 |
| H | 4.87482900 | 2.20901000  | 1.44355300  |
| H | 2.52230700 | 1.49651200  | 1.63158400  |
| C | 1.23095400 | -0.68963600 | -1.88963400 |
| O | 0.33941500 | -1.22642900 | -2.51813300 |
| N | 2.52842000 | -0.55677700 | -2.30416100 |
| H | 2.84557400 | -0.86187500 | -3.21561300 |
| C | 0.46058300 | -1.21400000 | 0.39949700  |
| H | 0.90368100 | -2.15809800 | 0.05441600  |
| C | 0.64625600 | -1.29309300 | 1.95993800  |
| C | 2.10182100 | -1.66054400 | 2.28227600  |
| H | 2.19944800 | -1.83454200 | 3.35899300  |
| H | 2.80939200 | -0.87972700 | 2.00625700  |

|   |             |             |             |
|---|-------------|-------------|-------------|
| H | 2.39301700  | -2.58232600 | 1.76619100  |
| C | -0.22534100 | -2.44043000 | 2.50237400  |
| H | -1.29472100 | -2.22888500 | 2.40440800  |
| H | -0.00843200 | -2.57455900 | 3.56646500  |
| H | -0.01062900 | -3.38824600 | 1.99628400  |
| C | 0.24200400  | -0.02508300 | 2.71027000  |
| H | 0.86655500  | 0.83081700  | 2.44996900  |
| H | 0.35318700  | -0.19476800 | 3.78665300  |
| H | -0.80273900 | 0.23582200  | 2.51811600  |
| C | -1.95544800 | 1.19692500  | 0.13457800  |
| C | -3.24403000 | 1.60080200  | -0.32197000 |
| C | -3.66415000 | 2.92944600  | -0.26173100 |
| C | -2.79402900 | 3.88461600  | 0.24961000  |
| C | -1.52126400 | 3.50843500  | 0.69620700  |
| C | -1.09923600 | 2.18237000  | 0.64951700  |
| C | -1.93489300 | -0.24814900 | -0.08806500 |
| H | -4.65496600 | 3.19542800  | -0.61823400 |
| H | -3.09863000 | 4.92536500  | 0.30136300  |
| H | -0.84598500 | 4.26197900  | 1.09001000  |
| H | -0.10816700 | 1.94233600  | 1.01425800  |
| N | -3.99222400 | 0.53593800  | -0.82483800 |
| C | -3.22898000 | -0.51696800 | -0.68338500 |
| H | 0.45201100  | 0.75603400  | -0.53485100 |
| C | -3.57602600 | -1.88203400 | -1.18849800 |
| H | -3.25020500 | -1.96828200 | -2.23346500 |
| H | -4.65449700 | -2.05026100 | -1.15472600 |
| H | -0.75693300 | -3.29072400 | -0.20154800 |
| C | -2.84150800 | -2.90245900 | -0.33491300 |
| H | -3.26873400 | -2.91367500 | 0.67851700  |
| H | -2.90674400 | -3.90759900 | -0.75147500 |
| C | -1.01138200 | -1.29674400 | 0.00853500  |
| N | -1.43338300 | -2.54132500 | -0.24181200 |

**IM7**

|   |            |             |             |
|---|------------|-------------|-------------|
| C | 2.41226800 | -0.93395400 | -0.07698300 |
| C | 2.34804100 | -1.81258400 | -1.17135000 |
| C | 3.24153800 | -2.86024800 | -1.34584900 |
| C | 4.25522200 | -3.00980600 | -0.39622000 |
| C | 4.37334200 | -2.11920800 | 0.66805400  |
| C | 3.45844100 | -1.07116200 | 0.82397500  |
| C | 1.31912600 | 0.10676700  | -0.23358300 |
| H | 3.16336100 | -3.52296000 | -2.20143900 |
| H | 4.96913900 | -3.82028900 | -0.50475400 |
| H | 5.18390300 | -2.23177500 | 1.38023300  |
| H | 3.57928200 | -0.37192200 | 1.64364000  |

|   |             |             |             |
|---|-------------|-------------|-------------|
| C | 0.81707100  | -0.18388400 | -1.66794300 |
| O | 0.05844500  | 0.48276400  | -2.34042400 |
| N | 1.34095200  | -1.39837800 | -2.04174100 |
| H | 1.18523800  | -1.78823200 | -2.96254400 |
| C | 0.07987500  | -0.00039200 | 0.71872200  |
| H | -0.31978600 | -1.01137500 | 0.58995900  |
| C | 0.33619400  | 0.19645500  | 2.25903100  |
| C | -0.98201700 | 0.55602400  | 2.96755300  |
| H | -0.81136100 | 0.58073000  | 4.04882200  |
| H | -1.76331400 | -0.18462100 | 2.76621700  |
| H | -1.35571400 | 1.53947200  | 2.66626200  |
| C | 1.34219500  | 1.31718500  | 2.54248000  |
| H | 2.29999400  | 1.17968700  | 2.03377200  |
| H | 1.53164400  | 1.37037400  | 3.62002300  |
| H | 0.94494300  | 2.28792100  | 2.22999000  |
| C | 0.80815800  | -1.12953000 | 2.87340900  |
| H | 0.04227000  | -1.90250400 | 2.74168700  |
| H | 0.96865300  | -0.99895400 | 3.94889400  |
| H | 1.73468600  | -1.50086500 | 2.43785600  |
| C | -3.01906200 | -0.73505400 | 0.10777500  |
| C | -4.24151000 | -0.51911000 | -0.59521300 |
| C | -5.22777300 | -1.50578700 | -0.64364000 |
| C | -5.00022200 | -2.71156400 | 0.01125200  |
| C | -3.80692700 | -2.92804200 | 0.71596100  |
| C | -2.81891400 | -1.94910200 | 0.77871200  |
| C | -2.29923200 | 0.51089900  | -0.05417000 |
| H | -6.15142500 | -1.32187000 | -1.18510800 |
| H | -5.75435600 | -3.49228800 | -0.01797500 |
| H | -3.65194700 | -3.87350000 | 1.22717000  |
| H | -1.91368700 | -2.13892600 | 1.34898100  |
| N | -4.29921700 | 0.74560600  | -1.18576600 |
| C | -3.17123500 | 1.32986200  | -0.84933400 |
| H | 1.73274000  | 1.11853100  | -0.20367200 |
| C | -2.69137000 | 2.66767000  | -1.32234500 |
| H | -3.52071600 | 3.36375400  | -1.46823700 |
| H | -2.17728200 | 2.54263000  | -2.28391900 |
| H | 0.26309000  | 2.57197900  | 0.13640400  |
| C | -1.71907500 | 3.21239600  | -0.28038700 |
| H | -1.20697700 | 4.10940800  | -0.63100700 |
| H | -2.27442200 | 3.46271700  | 0.63471200  |
| C | -1.00203100 | 0.94196300  | 0.22499800  |
| N | -0.69709100 | 2.22409700  | 0.05636800  |
| O | 1.74144000  | 3.68226900  | 0.16806500  |
| H | 1.71181800  | 4.17707500  | 0.99718000  |
| H | 3.88828200  | 1.26047100  | -2.93164100 |

|   |            |             |             |
|---|------------|-------------|-------------|
| O | 3.65341300 | 0.79485700  | -2.11726600 |
| H | 4.07988500 | -0.07186100 | -2.17575400 |
| H | 2.57991200 | 3.17002700  | 0.21128700  |
| O | 3.92540900 | 2.06428800  | 0.28648100  |
| H | 4.78850100 | 2.48953300  | 0.37214700  |
| H | 3.93888500 | 1.59615900  | -0.57550600 |

**TS5**

|   |             |             |             |
|---|-------------|-------------|-------------|
| C | -2.86443800 | 0.61059200  | -0.83002000 |
| C | -3.51686100 | -0.63538600 | -0.65342300 |
| C | -4.85999900 | -0.80465100 | -0.94976100 |
| C | -5.57003700 | 0.28755000  | -1.46141200 |
| C | -4.93988600 | 1.50988100  | -1.66336200 |
| C | -3.58514500 | 1.67723500  | -1.34199300 |
| C | -1.47787200 | 0.38593400  | -0.27790600 |
| H | -5.34068800 | -1.76820200 | -0.80541500 |
| H | -6.62051600 | 0.17167100  | -1.71003100 |
| H | -5.49874100 | 2.34643900  | -2.07038000 |
| H | -3.11734500 | 2.64128500  | -1.50111200 |
| C | -1.31072200 | -1.11287100 | -0.66171600 |
| O | -1.07308300 | -1.45168600 | -1.86988500 |
| N | -2.63533600 | -1.63283500 | -0.12313100 |
| H | -2.83083800 | -2.53862000 | -0.55063200 |
| C | -0.07907200 | 0.92584400  | -0.56950800 |
| H | 0.04904400  | 0.97600300  | -1.65856800 |
| C | 0.28696300  | 2.30523100  | 0.04335200  |
| C | 0.73913600  | 2.15039200  | 1.50242500  |
| H | 1.04334300  | 3.11978900  | 1.91135700  |
| H | 1.57529100  | 1.45585900  | 1.62218500  |
| H | -0.09469100 | 1.78370100  | 2.11391000  |
| C | -0.93949400 | 3.22589500  | 0.04831500  |
| H | -1.30516600 | 3.38762700  | -0.96927000 |
| H | -0.65667600 | 4.20283500  | 0.45603500  |
| H | -1.75477700 | 2.82663900  | 0.66032400  |
| C | 1.33140000  | 2.98007900  | -0.86092800 |
| H | 2.11556800  | 2.29544900  | -1.18394600 |
| H | 1.79814100  | 3.83738000  | -0.36341800 |
| H | 0.83671300  | 3.34659400  | -1.76681000 |
| C | 3.43075100  | 0.16315800  | -0.18610000 |
| C | 4.39258400  | -0.82126400 | -0.53354400 |
| C | 5.75691200  | -0.55301900 | -0.55335200 |
| C | 6.18868300  | 0.71712300  | -0.18263300 |
| C | 5.26299700  | 1.68170800  | 0.22304800  |
| C | 3.89425100  | 1.41337100  | 0.23864700  |
| C | 2.14564300  | -0.55833600 | -0.20676700 |

|   |             |             |             |
|---|-------------|-------------|-------------|
| H | 6.45587400  | -1.33451300 | -0.83457800 |
| H | 7.24821800  | 0.95305900  | -0.18787200 |
| H | 5.61004500  | 2.66045900  | 0.53908100  |
| H | 3.22169100  | 2.18398900  | 0.58830500  |
| N | 3.81395300  | -2.07327400 | -0.79714600 |
| C | 2.54765700  | -1.93648100 | -0.55564800 |
| H | -1.61363400 | 0.42202700  | 0.81671100  |
| C | 1.51523700  | -2.98699200 | -0.78004100 |
| H | 1.95071700  | -3.98370700 | -0.68443900 |
| H | 1.08721500  | -2.87329200 | -1.78114000 |
| H | -0.21812600 | -1.08855100 | 1.59710700  |
| C | 0.42577900  | -2.76065700 | 0.24926100  |
| H | -0.44122600 | -3.40059600 | 0.07364800  |
| H | 0.81003500  | -2.97161400 | 1.25397100  |
| C | 0.79709000  | -0.30344100 | -0.15435300 |
| N | -0.07047200 | -1.36676600 | 0.23355500  |
| O | -0.17577400 | -0.93541900 | 2.71018800  |
| H | 0.67902400  | -0.53218700 | 2.93547500  |
| H | -3.23784400 | -1.50364400 | 1.54338800  |
| O | -3.71734900 | -1.22279100 | 2.37205700  |
| H | -4.55177200 | -0.84814400 | 2.05620400  |
| H | -0.99147200 | -0.31475600 | 3.08344500  |
| O | -2.07790300 | 0.40352900  | 3.40274100  |
| H | -2.20231500 | 0.52184400  | 4.35597100  |
| H | -2.83858000 | -0.17911800 | 3.05125300  |

## PC

|   |             |             |             |
|---|-------------|-------------|-------------|
| C | -2.55306400 | -0.56992600 | -1.02084000 |
| C | -3.85211000 | -0.15266000 | -0.65276100 |
| C | -4.91760900 | -0.42868500 | -1.52999200 |
| C | -4.71514900 | -1.11482400 | -2.71790300 |
| C | -3.43841300 | -1.55059700 | -3.07077600 |
| C | -2.37807700 | -1.27349800 | -2.21415500 |
| C | -1.36805100 | -0.33585200 | -0.10626800 |
| H | -5.91414200 | -0.09709600 | -1.25049300 |
| H | -5.56077500 | -1.31181200 | -3.37030100 |
| H | -3.27092900 | -2.09767000 | -3.99209200 |
| H | -1.38221800 | -1.62415400 | -2.47614900 |
| C | -0.96144300 | -1.60425300 | 0.60147400  |
| O | -1.67927000 | -2.41129100 | 1.15902400  |
| N | -4.11163900 | 0.45792100  | 0.55677300  |
| H | -5.00929800 | 0.91193900  | 0.66451600  |
| C | -0.06054400 | 0.17798600  | -0.75045800 |
| H | -0.01815600 | -0.21846000 | -1.77457200 |
| C | 0.04508200  | 1.71909300  | -0.86206300 |

|   |             |             |             |
|---|-------------|-------------|-------------|
| C | 0.50461300  | 2.32011500  | 0.47256100  |
| H | 0.63677000  | 3.40340800  | 0.37880600  |
| H | 1.43676900  | 1.88978500  | 0.84299300  |
| H | -0.26038600 | 2.14257900  | 1.23673500  |
| C | -1.32632700 | 2.33248100  | -1.19164000 |
| H | -1.76383600 | 1.88339200  | -2.08827300 |
| H | -1.19464300 | 3.40335900  | -1.38106100 |
| H | -2.03882600 | 2.22989700  | -0.36667800 |
| C | 0.95283000  | 2.04471900  | -2.06115200 |
| H | 1.84897200  | 1.42386400  | -2.09779300 |
| H | 1.25590900  | 3.09699100  | -2.05762300 |
| H | 0.39675200  | 1.85982200  | -2.98665900 |
| C | 3.52345300  | 0.39087700  | -0.23309900 |
| C | 4.69927000  | -0.38816000 | -0.06251200 |
| C | 5.97752700  | 0.14365300  | -0.19794100 |
| C | 6.10702200  | 1.49806900  | -0.48478900 |
| C | 4.96673600  | 2.29548500  | -0.60772200 |
| C | 3.68561900  | 1.76133800  | -0.47449000 |
| C | 2.42041700  | -0.55003900 | 0.04590100  |
| H | 6.84239900  | -0.49849900 | -0.06360000 |
| H | 7.09235700  | 1.93968700  | -0.59558900 |
| H | 5.07200700  | 3.35756300  | -0.80580000 |
| H | 2.84556400  | 2.43441100  | -0.55360900 |
| N | 4.42401600  | -1.71585100 | 0.29267600  |
| C | 3.13378100  | -1.79412800 | 0.39154000  |
| H | -1.63006300 | 0.34464800  | 0.71309300  |
| C | 2.39986500  | -3.05347900 | 0.71578500  |
| H | 3.01058400  | -3.69595800 | 1.35251700  |
| H | 2.17895000  | -3.60084100 | -0.20905900 |
| H | -1.51680000 | -1.25964300 | 3.02006300  |
| C | 1.10676200  | -2.66911000 | 1.40608100  |
| H | 0.42867700  | -3.51150800 | 1.53821400  |
| H | 1.30493900  | -2.21317300 | 2.38435000  |
| C | 1.04236600  | -0.60549800 | -0.01751100 |
| N | 0.41515800  | -1.68269600 | 0.58498800  |
| O | -0.98825900 | -0.46706400 | 3.19959700  |
| H | -0.62607300 | -0.58995300 | 4.08790300  |
| H | -3.37805600 | 0.98259100  | 1.01716000  |
| O | -5.22582600 | 2.30394400  | 2.51982400  |
| H | -5.16684200 | 3.18151100  | 2.12291800  |
| H | -1.93518600 | 1.00055800  | 2.95412700  |
| O | -2.42769200 | 1.77752900  | 2.61165100  |
| H | -1.87225100 | 2.54688400  | 2.79214700  |
| H | -4.30387100 | 2.08667400  | 2.73836400  |

**3ao**

|   |             |             |             |
|---|-------------|-------------|-------------|
| C | -3.06360000 | 0.04272600  | 0.16083400  |
| C | -4.22889900 | -0.37605800 | -0.51290500 |
| C | -5.43135100 | -0.46234300 | 0.20913900  |
| C | -5.49102800 | -0.12650500 | 1.55332300  |
| C | -4.34543600 | 0.30786600  | 2.21874900  |
| C | -3.15119900 | 0.38796200  | 1.51228800  |
| C | -1.73719000 | 0.19137100  | -0.55426800 |
| H | -6.32500100 | -0.79439200 | -0.31280400 |
| H | -6.43644400 | -0.20399500 | 2.08158500  |
| H | -4.38134500 | 0.58211300  | 3.26740000  |
| H | -2.25635500 | 0.73797200  | 2.02263600  |
| C | -1.36574500 | 1.65023000  | -0.71106500 |
| O | -2.07733900 | 2.57322400  | -1.03597000 |
| N | -4.24781600 | -0.64859200 | -1.87871300 |
| H | -5.04211600 | -1.20448400 | -2.17060100 |
| C | -0.49708100 | -0.43943700 | 0.12095000  |
| H | -0.64719900 | -0.36233600 | 1.20768700  |
| C | -0.26216300 | -1.93535200 | -0.18927000 |
| C | 0.38104400  | -2.10165600 | -1.57229800 |
| H | 0.63552400  | -3.15136800 | -1.75313200 |
| H | 1.28364400  | -1.50060200 | -1.70130000 |
| H | -0.32557500 | -1.79634200 | -2.35266100 |
| C | -1.59634700 | -2.69886700 | -0.20585600 |
| H | -2.15582400 | -2.55259500 | 0.72300200  |
| H | -1.38726900 | -3.76908600 | -0.30967100 |
| H | -2.23446700 | -2.40741700 | -1.04552900 |
| C | 0.54873700  | -2.53683400 | 0.97279700  |
| H | 1.37997100  | -1.90511600 | 1.28713500  |
| H | 0.94019000  | -3.52587900 | 0.71309400  |
| H | -0.11038700 | -2.65492700 | 1.83966300  |
| C | 3.13750200  | -0.33209800 | 0.09378000  |
| C | 4.25214600  | 0.50346800  | 0.37306200  |
| C | 5.54646000  | 0.00839400  | 0.49879200  |
| C | 5.75782200  | -1.35388500 | 0.31839900  |
| C | 4.68432200  | -2.18888400 | -0.00199300 |
| C | 3.38726100  | -1.69315600 | -0.12560300 |
| C | 1.99900700  | 0.60175000  | -0.00654200 |
| H | 6.36228900  | 0.68985100  | 0.71903500  |
| H | 6.75748200  | -1.76668100 | 0.41041800  |
| H | 4.85703000  | -3.24815300 | -0.16462100 |
| H | 2.60310000  | -2.38408600 | -0.39598700 |
| N | 3.90515700  | 1.85802300  | 0.46457200  |
| C | 2.63476500  | 1.91391900  | 0.20974200  |
| H | -1.79795900 | -0.18745400 | -1.58147300 |



|   |             |             |             |
|---|-------------|-------------|-------------|
| C | 1.83187100  | 3.17239500  | 0.24733200  |
| H | 2.45639800  | 4.03077100  | -0.00613800 |
| H | 1.43424200  | 3.32617700  | 1.25826600  |
| H | -3.39184200 | -1.00165700 | -2.28572700 |
| C | 0.69057400  | 3.01907500  | -0.73808600 |
| H | -0.04305400 | 3.82160100  | -0.66777700 |
| H | 1.07201300  | 2.97465000  | -1.76548000 |
| C | 0.62412300  | 0.58089400  | -0.14594300 |
| N | -0.00904000 | 1.77025300  | -0.45463100 |

## 9. References

1. a) J. F. Zheng, J. Z. Bi, L. Ma, L. L. Chen, L. H. Tang, D. Xiong and Y. Tian, *Chem. Commun.*, **2023**, *59*, 8572–8575; b) X. H. Zhao, X. H. Liu, H. J. Mei, J. Guo, L. L. Lin, X. M. Feng. *Angew. Chem. Int. Ed.*, **2015**, *54*, 4032–4035; c) H. Liu, A. Domling, *J. Org. Chem.*, **2009**, *74*, 6895–6898.
2. a) X. H. Zhao, X. H. Liu, Q. Xiong, H. J. Mei, B. W. Ma, L. L. Lin and X. M. Feng, *Chem. Commun.*, **2015**, *51*, 16076–16079; b) G. Wang, X. H. Liu, T. Y. Huang, Y. L. Kuang, L. L. Lin and X. M. Feng, *Org. Lett.*, **2013**, *15*, 76–79; c) S. H. Li, W. M. Yuan and S. M. Ma, *Angew. Chem. Int. Ed.*, **2011**, *50*, 2578–2582; d) G. Tacconi, L. D. Maggi, P. Righetti, G. Desimoni, O. Azzolina and V. Ghislandi, *J. Chem. Soc., Perkin Trans. 2*, **1976**, 150–154; e) A. L. Gerten, M. C. Slade, K. M. Pugh and L. M. Stanley, *Org. Biomol. Chem.* **2013**, *11* (45), 7834–7837.
3. T. K. Heiss, R. S. Dorn, A. J. Ferreira, A. C. Love, and J. A. Prescher, *J. Am. Chem. Soc.* **2022**, *144*, 7871–7880.
4. a) P. Hohenberg, W. Kohn, *Phys. Rev.* **1964**, *136*, B864–B871; b) W. Kohn, L. J. Sham, *Phys. Rev.* **1965**, *140*, A1133–A1138.
5. Y. Zhao, D. G. Truhlar, *Theor. Chem. Acc.* **2008**, *120*, 215–241.
6. S. Grimme, J. Antony, S. Ehrlich, H. Krieg, *J. Chem. Phys.* **2010**, *132*, 154104.
7. A. V. Marenich, C. J. Cramer, D. G. Truhlar, *J. Phys. Chem. B* **2009**, *113*, 6378–6396.
8. a) K. Fukui, *J. Chem. Phys.* **1970**, *74*, 4161–4163; b) K. Fukui, *Acc. Chem. Res.* **1981**, *14*, 363–368.
9. M. J. Frisch, G. W. Trucks, H. B. Schlegel, G. E. Scuseria, M. A. Robb, J. R. Cheeseman, G. Scalmani, V. Barone, G. A. Petersson, H. Nakatsuji, X. Li, M. Caricato, A. V. Marenich, J. Bloino, B. G. Janesko, R. Gomperts, B. Mennucci, H. P. Hratchian, J. V. Ortiz, A. F. Izmaylov, J. L. Sonnenberg, D. Williams-Young, F. Ding, F. Lipparini, F. Egidi, J. Goings, B. Peng, A. Petrone, T. Henderson, D. Ranasinghe, V. G. Zakrzewski, J. Gao, N. Rega, G. Zheng, W. Liang, M. Hada, M. Ehara, K. Toyota, R. Fukuda, J. Hasegawa, M. Ishida, T. Nakajima, Y. Honda, O. Kitao, H. Nakai, T. Vreven, K. Throssell, J. A. Jr. Montgomery, J. E. Peralta, F. Ogliaro, M. J. Bearpark, J. J. Heyd, E. N. Brothers, K. N. Kudin, V. N. Staroverov, T. A. Keith, R. Kobayashi, J. Normand, K. Raghavachari, A. P. Rendell, J. C. Burant, S. S. Iyengar, J. Tomasi, M. Cossi, J. M. Millam, M. Klene, C. Adamo, R. Cammi, J. W. Ochterski, R. L. Martin, K. Morokuma, O. Farkas, J. B. Foresman, D. J. Fox, Gaussian 16, revision B.01, Gaussian, Inc.: Wallingford, CT, 2016.

## 10. X-ray crystallographic data

### 10.1 X-ray crystallographic data of **3aa**:

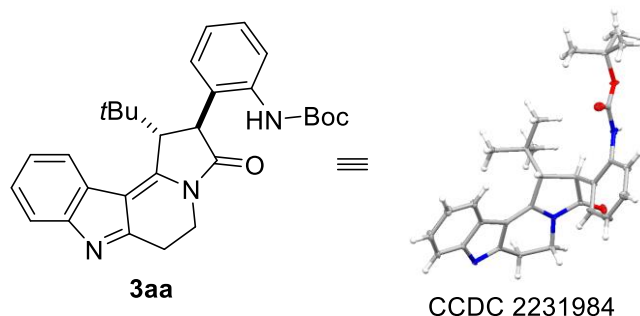

The single crystal for compound **3aa** was obtained by vaporization of a mixture solvent of Petroleum ether and ethyl acetate (v/v = 1/2). The data were collected on a Xcalibur Eos diffractometer equipped with MoK $\alpha$  X-ray sources ( $\lambda = 1.54178 \text{ \AA}$ ).

X-ray derived ORTEP of **3aa** with thermal ellipsoids shown at the 30% probability level. Structure deposited at the Cambridge Crystallographic Data Centre. CCDC 2231984 contains the supplementary crystallographic data which can be obtained free of charge from the Cambridge Crystallographic Data Center via <https://www.ccdc.cam.ac.uk/structures/>

---

|                                                |                                                                  |
|------------------------------------------------|------------------------------------------------------------------|
| Empirical formula                              | C <sub>27</sub> H <sub>24</sub> N <sub>4</sub> O                 |
| Formula weight                                 | 471.58                                                           |
| Temperature/K                                  | 173 (2)                                                          |
| Crystal system                                 | trigonal                                                         |
| Space group                                    | R-3                                                              |
| a/ $\text{\AA}$                                | 25.3489 (3)                                                      |
| b/ $\text{\AA}$                                | 25.3489 (3)                                                      |
| c/ $\text{\AA}$                                | 27.6292 (6)                                                      |
| $\alpha/^\circ$                                | 90                                                               |
| $\beta/^\circ$                                 | 90                                                               |
| $\gamma/^\circ$                                | 120                                                              |
| Volume/ $\text{\AA}^3$                         | 15375.1 (5)                                                      |
| Z                                              | 18                                                               |
| $\rho_{\text{calc}}/\text{cm}^3$               | 0.917                                                            |
| $\mu/\text{mm}^{-1}$                           | 0.475                                                            |
| F(000)                                         | 4536                                                             |
| Crystal size/ $\text{mm}^3$                    | 0.174 $\times$ 0.159 $\times$ 0.150                              |
| adiation                                       | MoK $\alpha$ ( $\lambda = 1.54178$ )                             |
| 2 $\Theta$ range for data collection/ $^\circ$ | 5.142 to 136.568                                                 |
| Reflections collected                          | 20003                                                            |
| Independent reflections                        | 4710 [ $R_{\text{int}} = 0.0641$ , $R_{\text{sigma}} = 0.0648$ ] |

|                                           |                                                   |
|-------------------------------------------|---------------------------------------------------|
| Data/restraints/parameters                | 6042/0/327                                        |
| Goodness-of-fit on F <sup>2</sup>         | 1.286                                             |
| Final R indexes [ $I \geq 2\sigma(I)$ ]   | R <sub>1</sub> = 0.1171, wR <sub>2</sub> = 0.2895 |
| Final R indexes [all data]                | R <sub>1</sub> = 0.1319, wR <sub>2</sub> = 0.3069 |
| Largest diff. peak/hole/e Å <sup>-3</sup> | 0.78/-0.49                                        |

## 10.2 X-ray crystallographic data of **5a**:

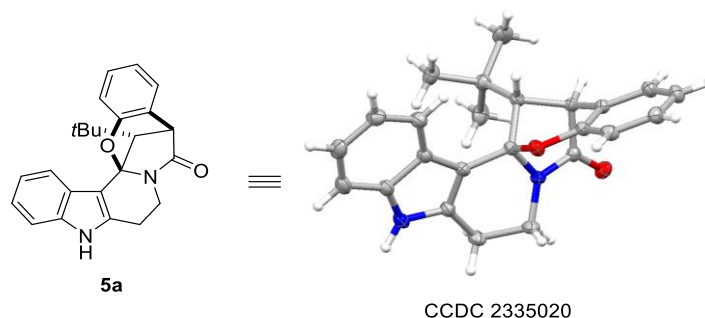

The single crystal for compound **5a** was obtained by vaporization of a mixture solvent of Ethanol and Dichloromethane (v/v = 2:3). The data were collected on a Xcalibur Eos diffractometer equipped with MoK $\alpha$  X-ray sources ( $\lambda = 0.71073$  Å).

X-ray derived ORTEP of **5a** with thermal ellipsoids shown at the 30% probability level. Structure deposited at the Cambridge Crystallographic Data Centre. CCDC 2335020 contains the supplementary crystallographic data which can be obtained free of charge from the Cambridge Crystallographic Data Center via <https://www.ccdc.cam.ac.uk/structures/>.

|                              |                                                               |
|------------------------------|---------------------------------------------------------------|
| Empirical formula            | C <sub>24</sub> H <sub>24</sub> N <sub>2</sub> O <sub>2</sub> |
| Formula weight               | 372.45                                                        |
| Temperature/K                | 293.15                                                        |
| Crystal system               | monoclinic                                                    |
| Space group                  | P2 <sub>1</sub> /n                                            |
| a/Å                          | 10.0963 (4)                                                   |
| b/Å                          | 10.5857 (4)                                                   |
| c/Å                          | 18.6757 (8)                                                   |
| $\alpha$ /°                  | 90                                                            |
| $\beta$ /°                   | 104.516 (4)                                                   |
| $\gamma$ /°                  | 90                                                            |
| Volume/Å <sup>3</sup>        | 1932.27 (14)                                                  |
| Z                            | 4                                                             |
| $\rho$ calcg/cm <sup>3</sup> | 1.280                                                         |
| $\mu$ /mm <sup>-1</sup>      | 0.082                                                         |
| F(000)                       | 792.0                                                         |

|                                                  |                                                                  |
|--------------------------------------------------|------------------------------------------------------------------|
| Crystal size/mm <sup>3</sup>                     | 0.35 × 0.3 × 0.25                                                |
| Radiation                                        | MoK $\alpha$ ( $\lambda = 0.71073$ )                             |
| 2 $\Theta$ range for data collection/ $^{\circ}$ | 6.48 to 52.742                                                   |
| Reflections collected                            | 8350                                                             |
| Independent reflections                          | 3952 [ $R_{\text{int}} = 0.0263$ , $R_{\text{sigma}} = 0.0533$ ] |
| Data/restraints/parameters                       | 3952/0/260                                                       |
| Goodness-of-fit on $F^2$                         | 1.037                                                            |
| Final R indexes [ $I \geq 2\sigma(I)$ ]          | $R_1 = 0.0529$ , $wR_2 = 0.1080$                                 |
| Final R indexes [all data]                       | $R_1 = 0.0840$ , $wR_2 = 0.1259$                                 |
| Largest diff. peak/hole/e $\text{\AA}^{-3}$      | 0.17/-0.21                                                       |

---

# 11. Copy of NMR spectra

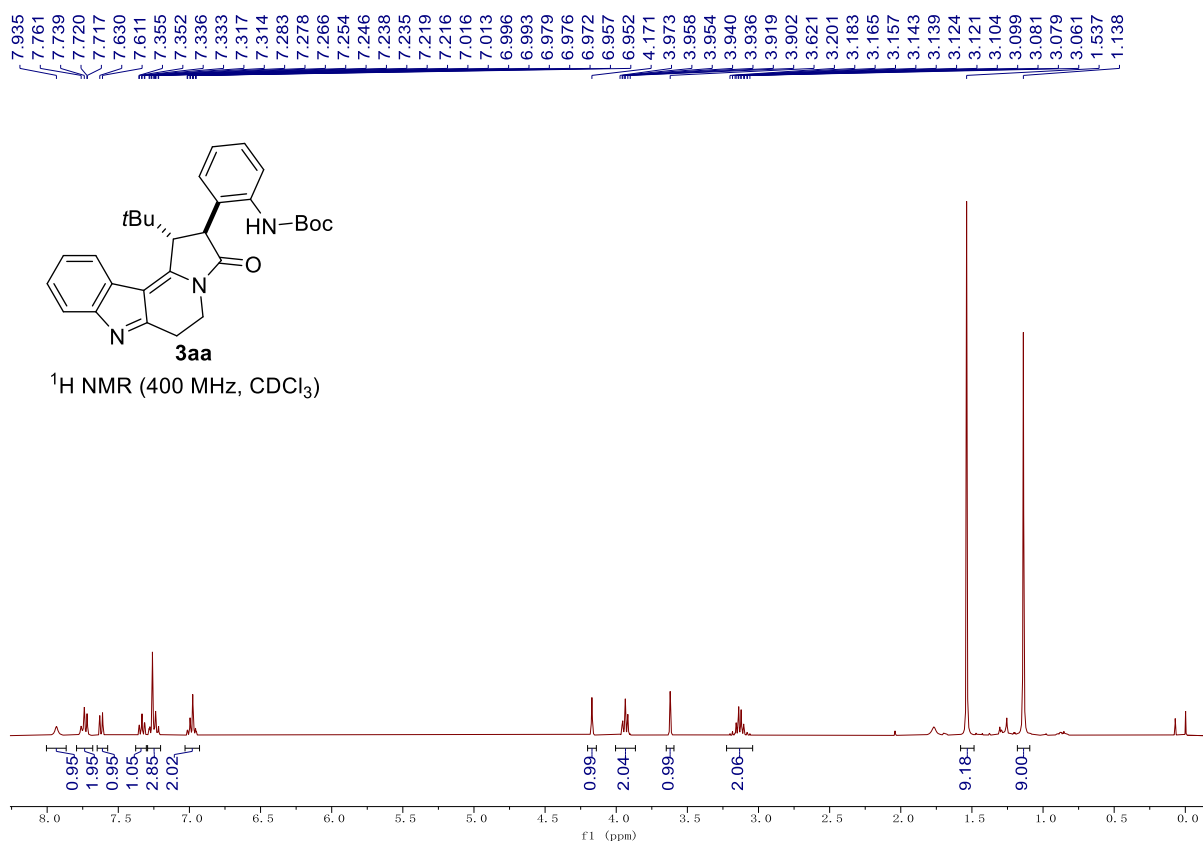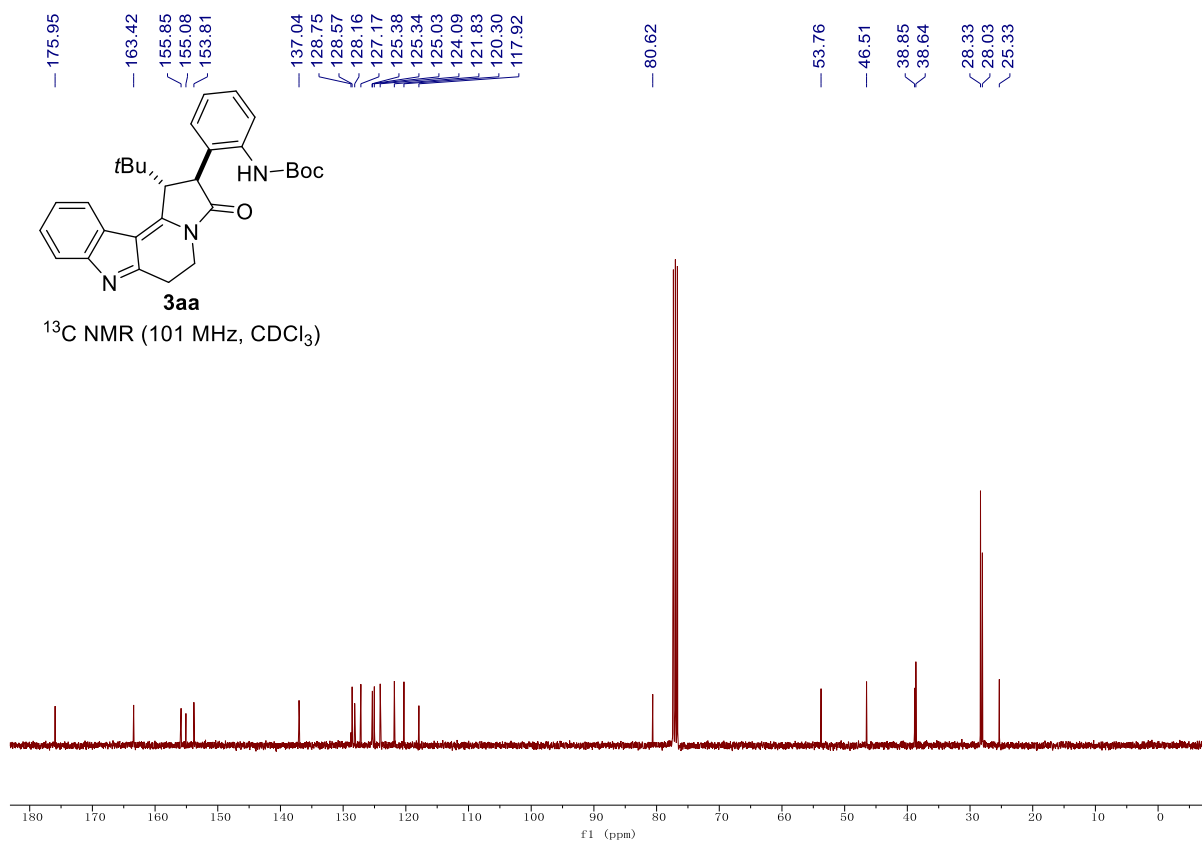

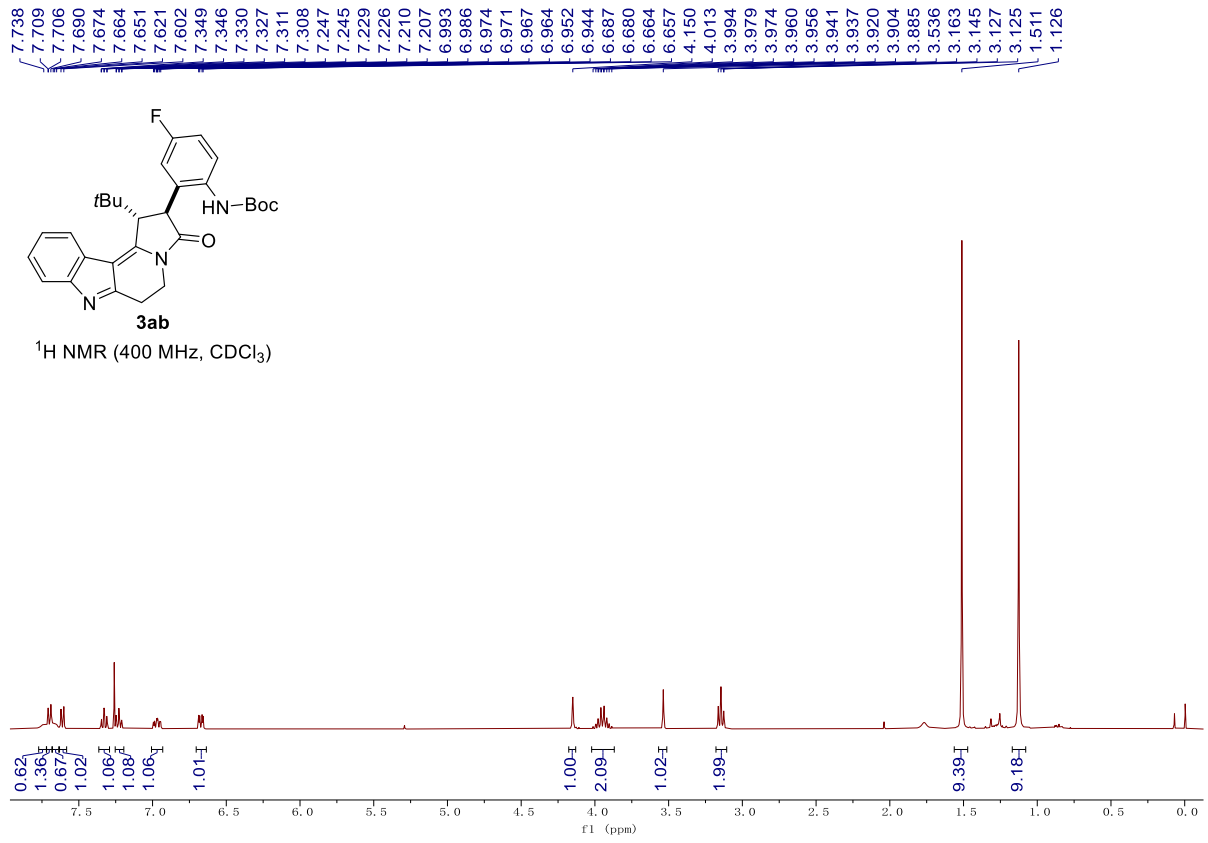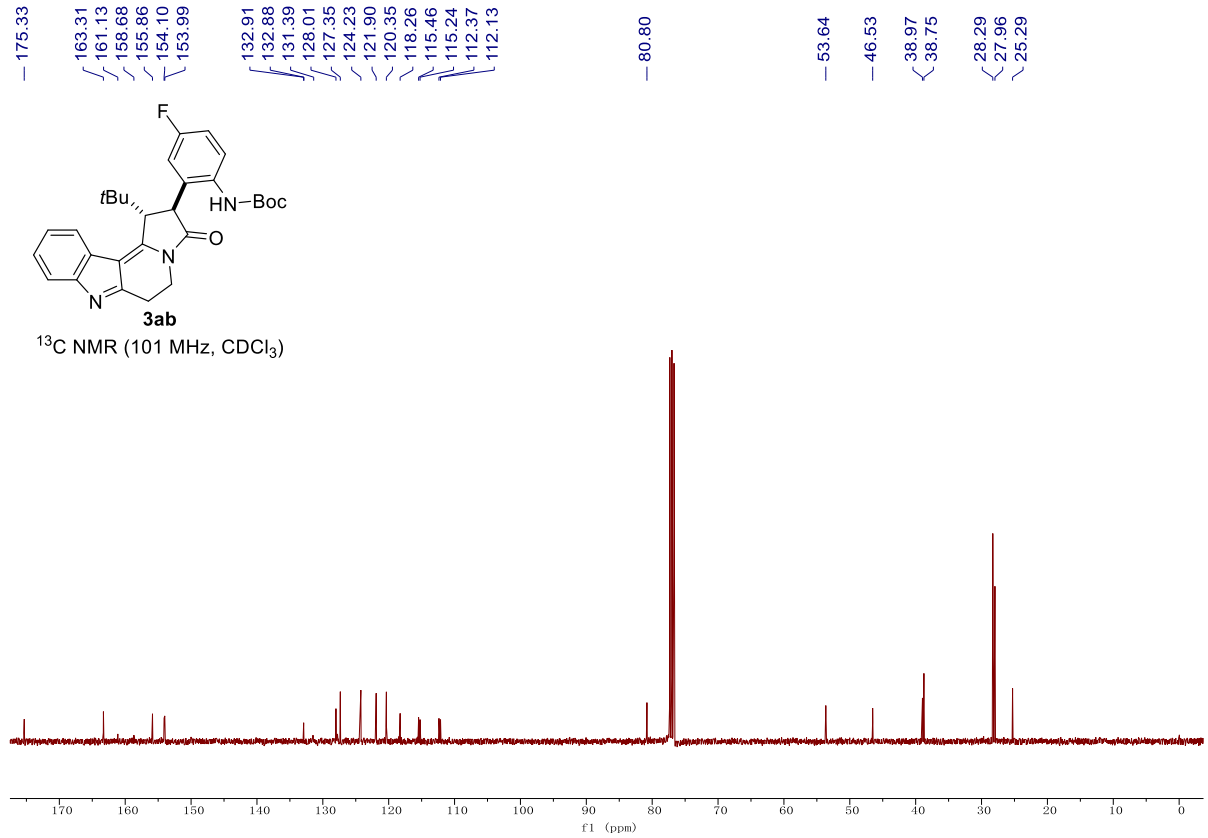

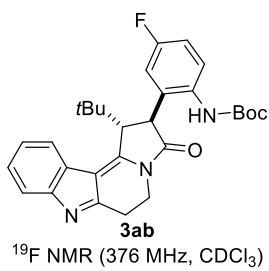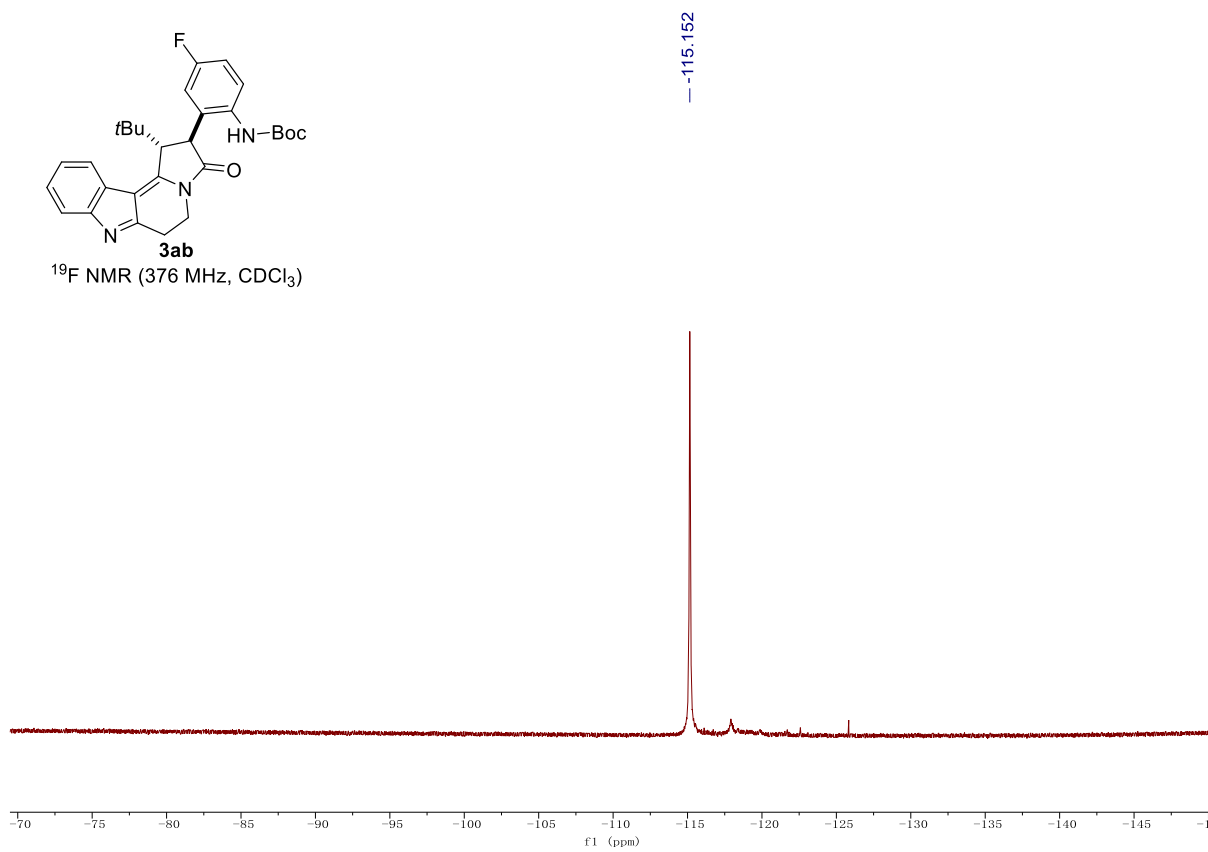





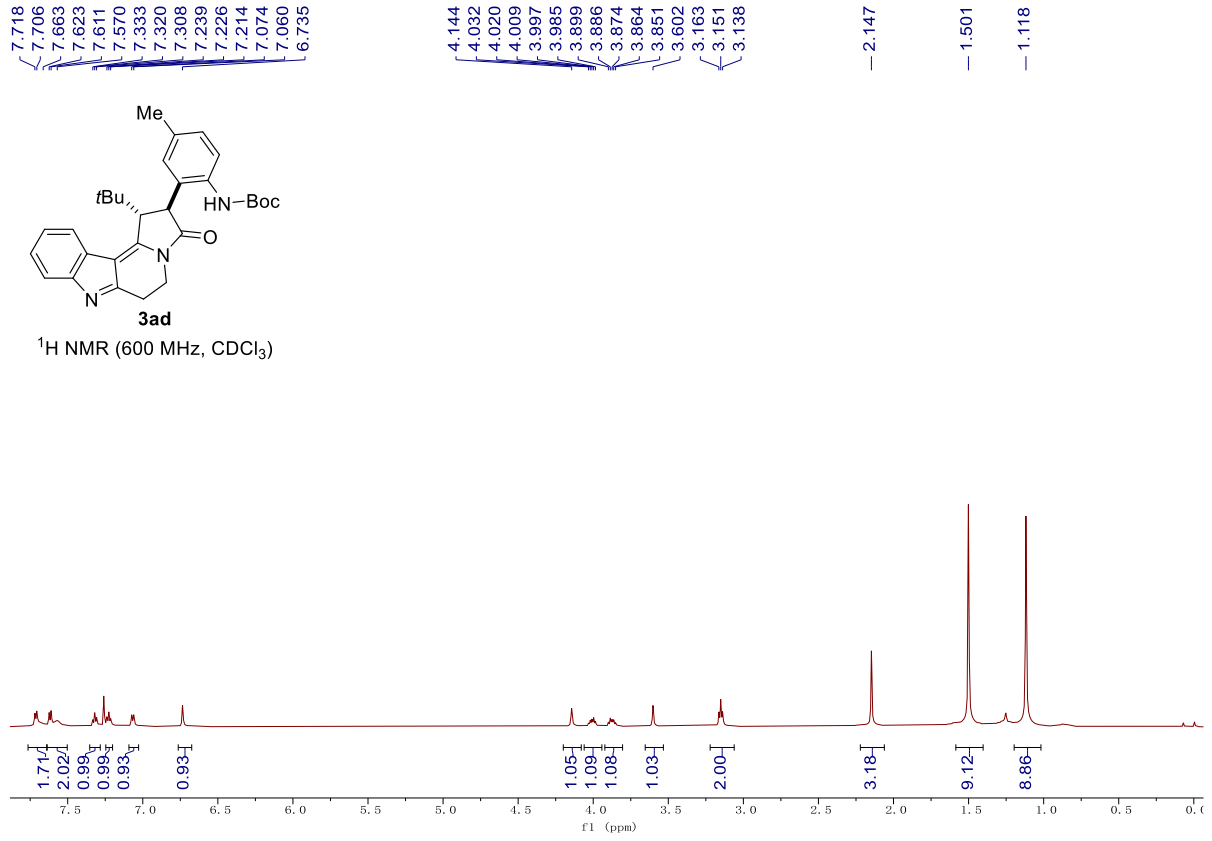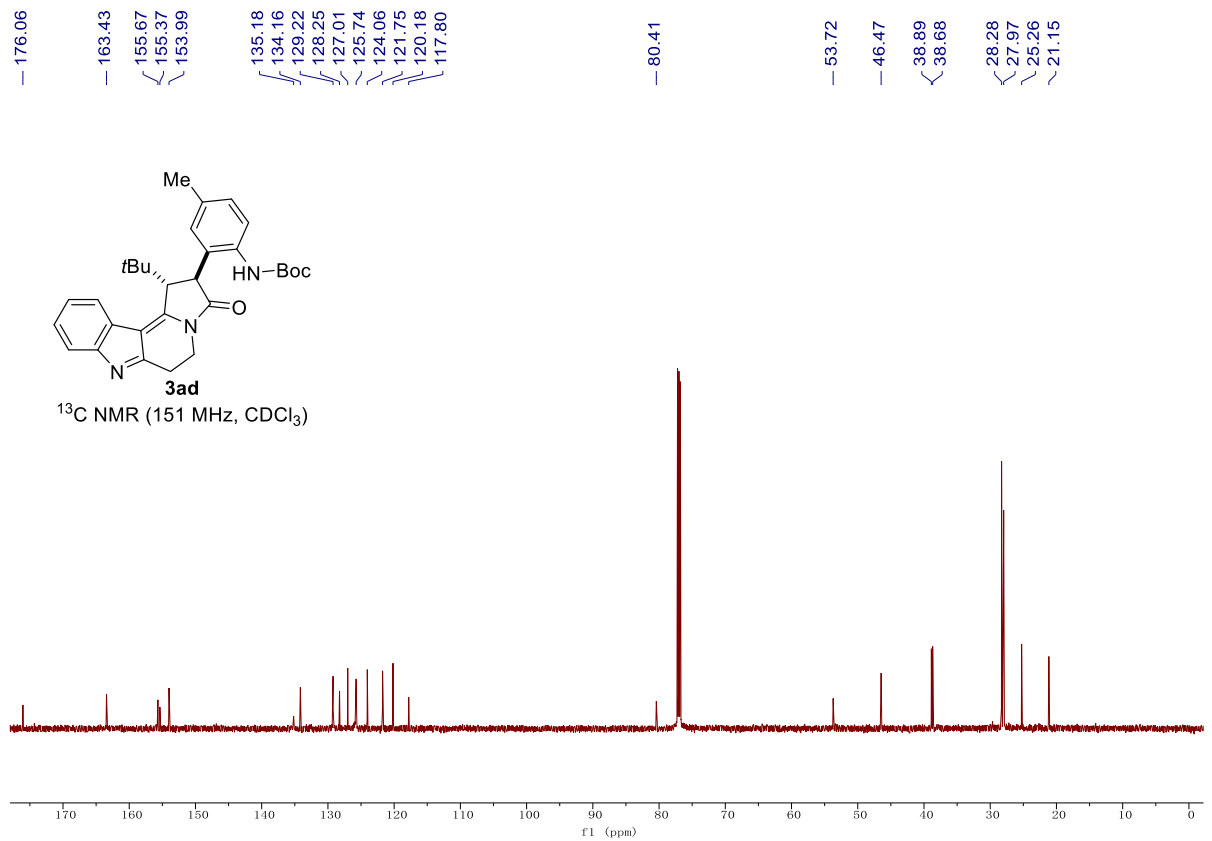

8.137  
7.877  
7.872  
7.728  
7.710  
7.630  
7.611  
7.364  
7.361  
7.345  
7.342  
7.326  
7.323  
7.244  
7.242  
7.226  
7.223  
6.968  
6.962  
6.947  
6.941  
6.885  
6.864  
4.079  
3.990  
3.972  
3.956  
3.949  
3.938  
3.932  
3.928  
3.920  
3.910  
3.898  
3.894  
3.877  
3.571  
3.200  
3.183  
3.165  
3.157  
3.139  
3.134  
3.121  
3.116  
3.113  
3.095  
3.091  
3.073  
3.070  
3.052  
1.549  
1.135

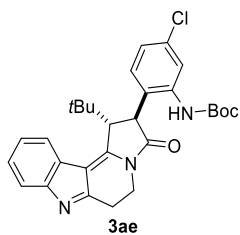

$^1\text{H NMR}$  (400 MHz,  $\text{CDCl}_3$ )

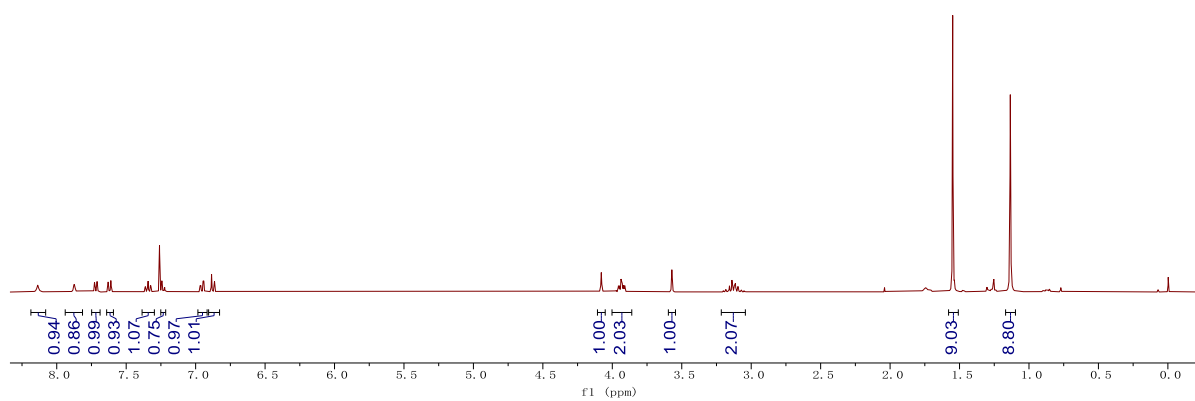

175.54  
163.33  
155.91  
154.28  
153.36  
138.40  
134.36  
127.98  
127.39  
126.27  
125.97  
124.97  
124.61  
124.22  
121.81  
120.41  
118.17  
81.14  
53.58  
46.18  
38.87  
38.68  
28.30  
28.00  
25.30

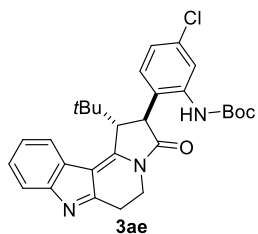

$^{13}\text{C NMR}$  (101 MHz,  $\text{CDCl}_3$ )

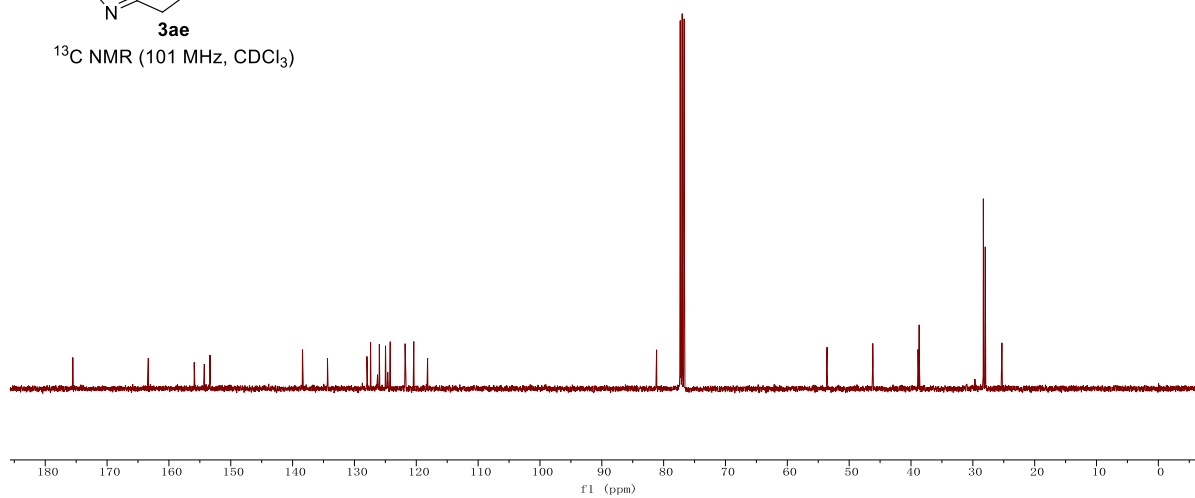

8.124  
8.017  
8.012  
7.723  
7.704  
7.628  
7.609  
7.562  
7.359  
7.343  
7.340  
7.324  
7.321  
7.242  
7.239  
7.224  
7.221  
7.119  
7.114  
7.098  
7.093  
6.825  
6.804  
4.067  
3.987  
3.969  
3.953  
3.947  
3.935  
3.930  
3.926  
3.917  
3.909  
3.892  
3.875  
3.564  
3.199  
3.182  
3.164  
3.155  
3.138  
3.133  
3.120  
3.115  
3.113  
3.094  
3.090  
3.072  
3.069  
3.051  
1.547  
1.132

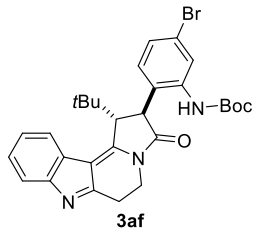

$^1\text{H NMR}$  (400 MHz,  $\text{CDCl}_3$ )

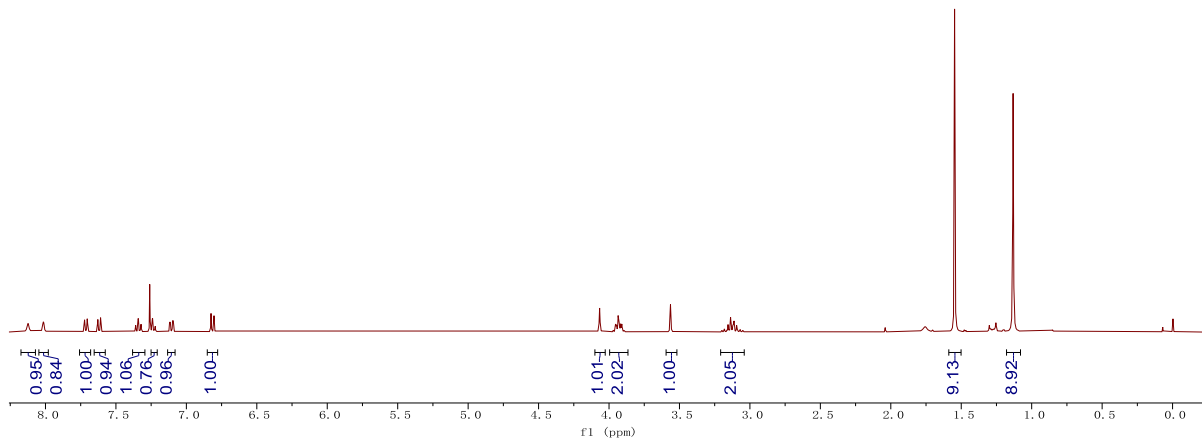

175.44  
163.32  
155.90  
154.24  
153.34  
138.52  
127.53  
127.39  
126.86  
126.25  
124.22  
122.22  
121.80  
120.40  
118.17  
81.15  
53.54  
46.25  
38.87  
38.67  
25.29

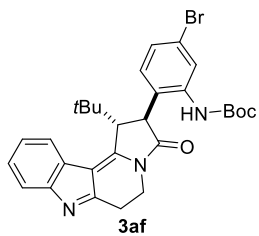

$^{13}\text{C NMR}$  (101 MHz,  $\text{CDCl}_3$ )

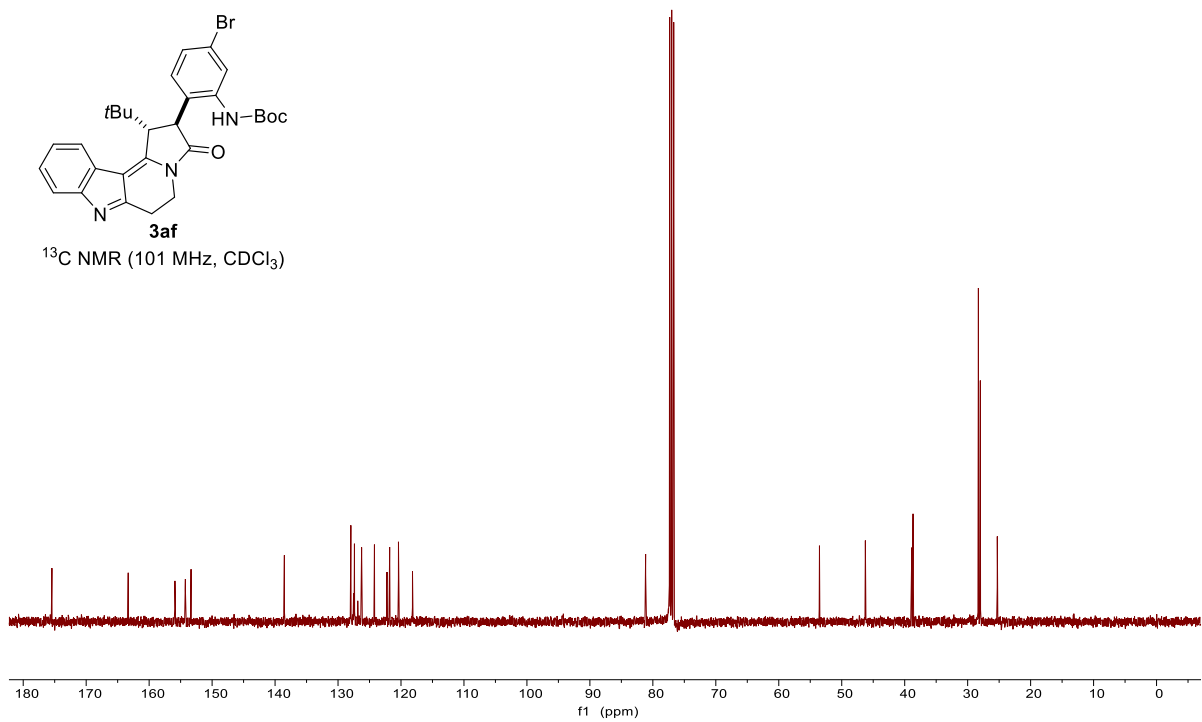

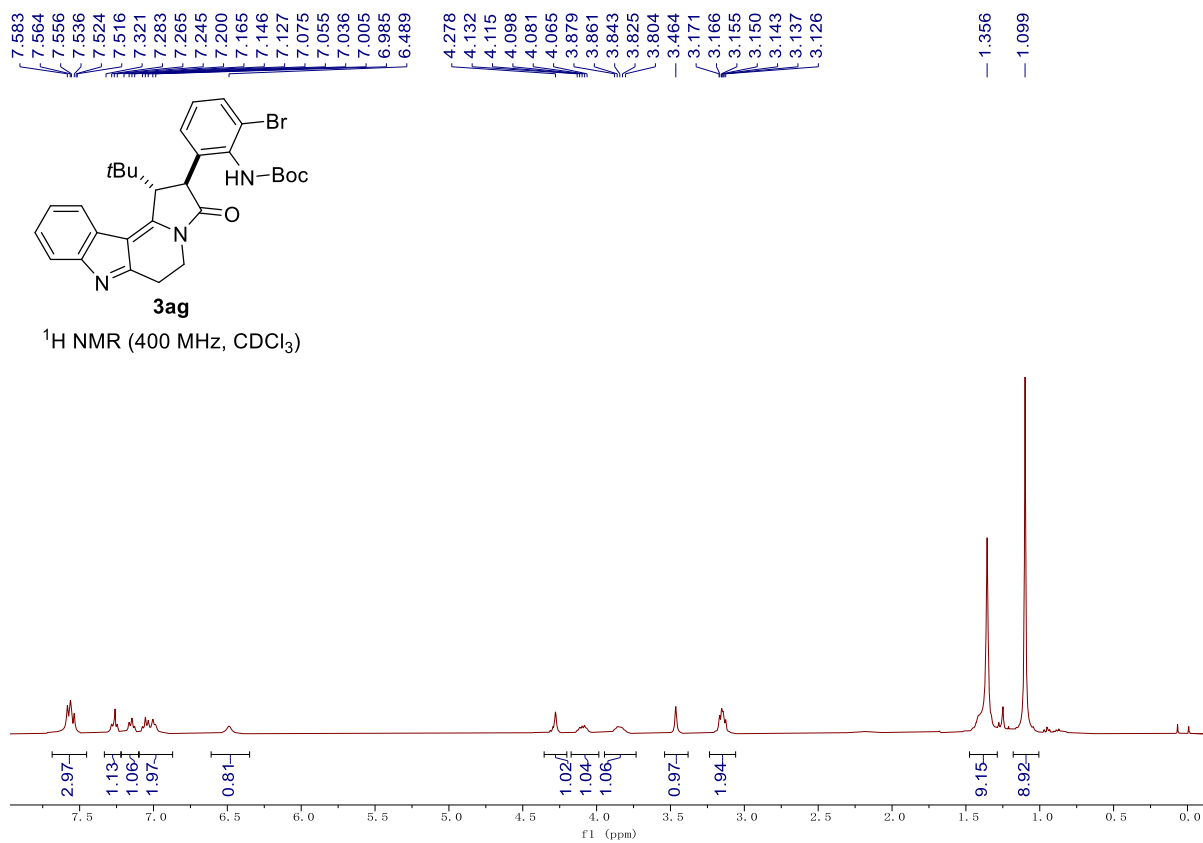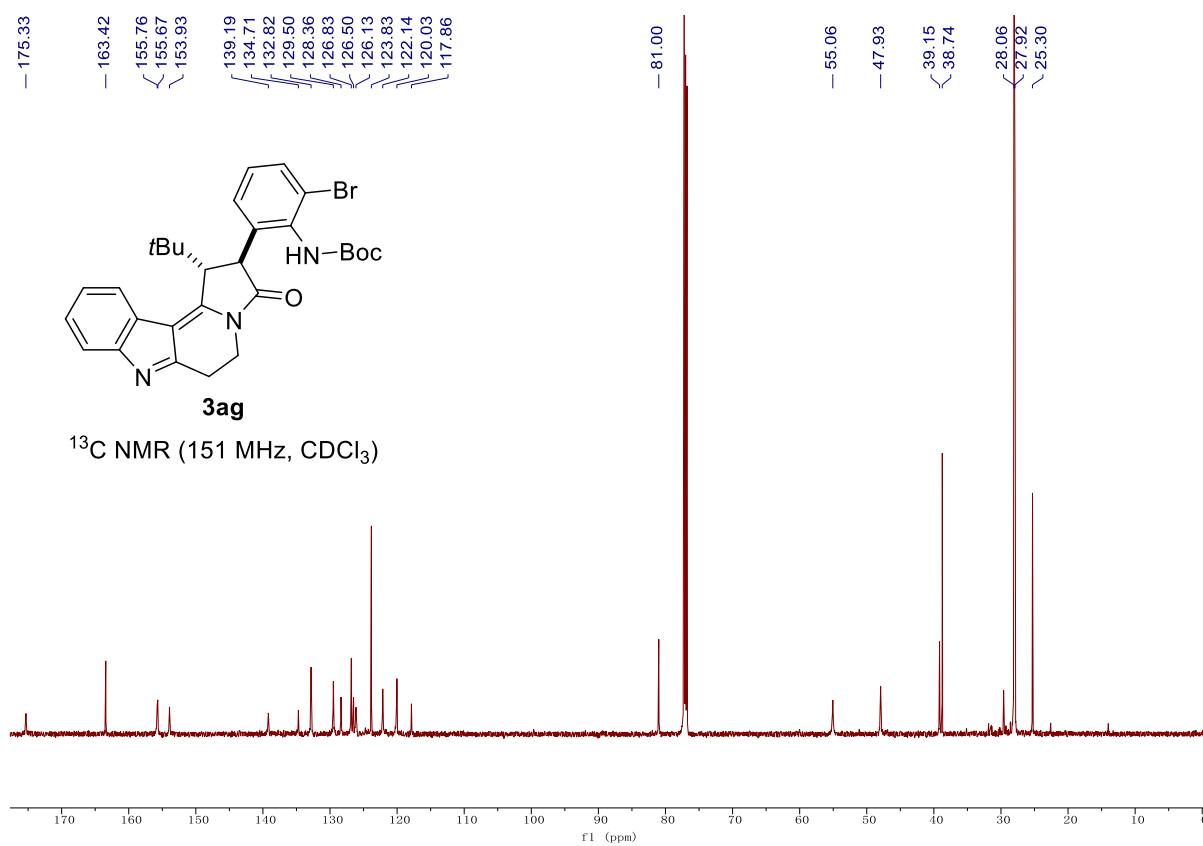

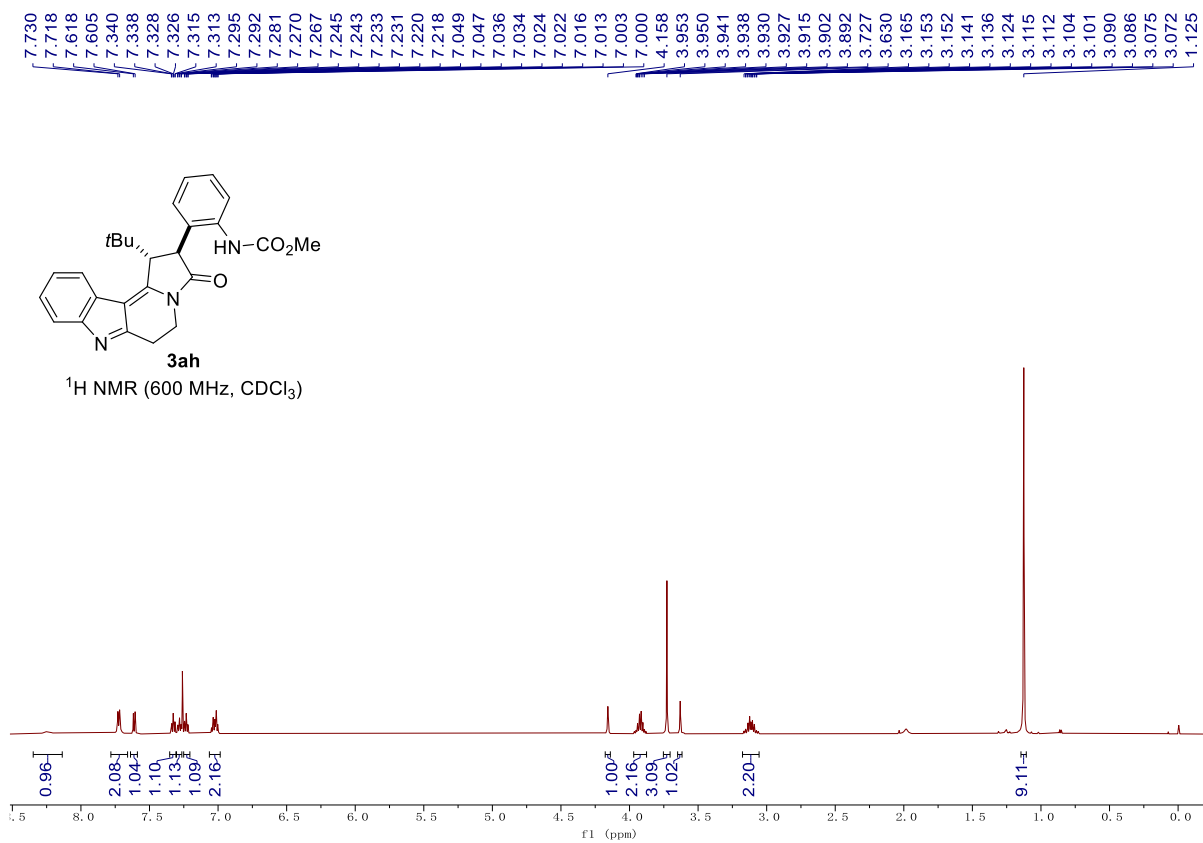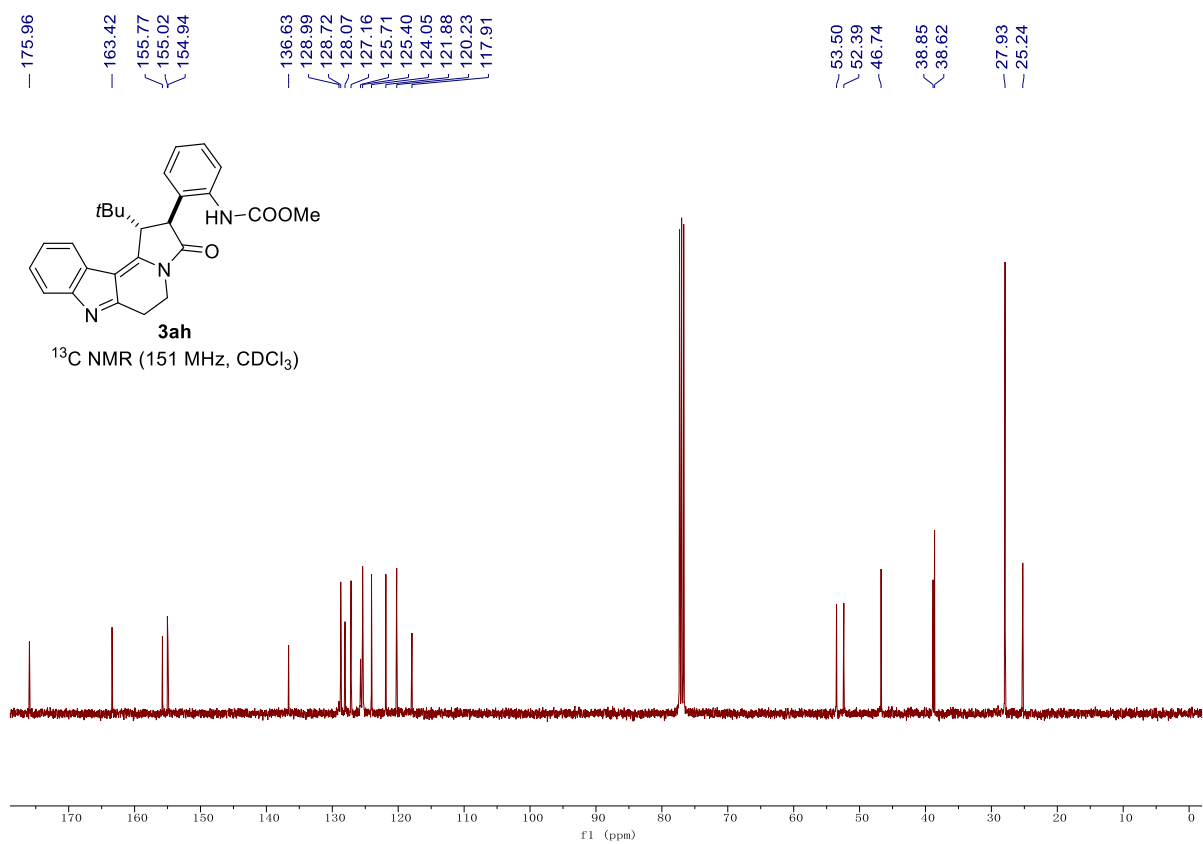

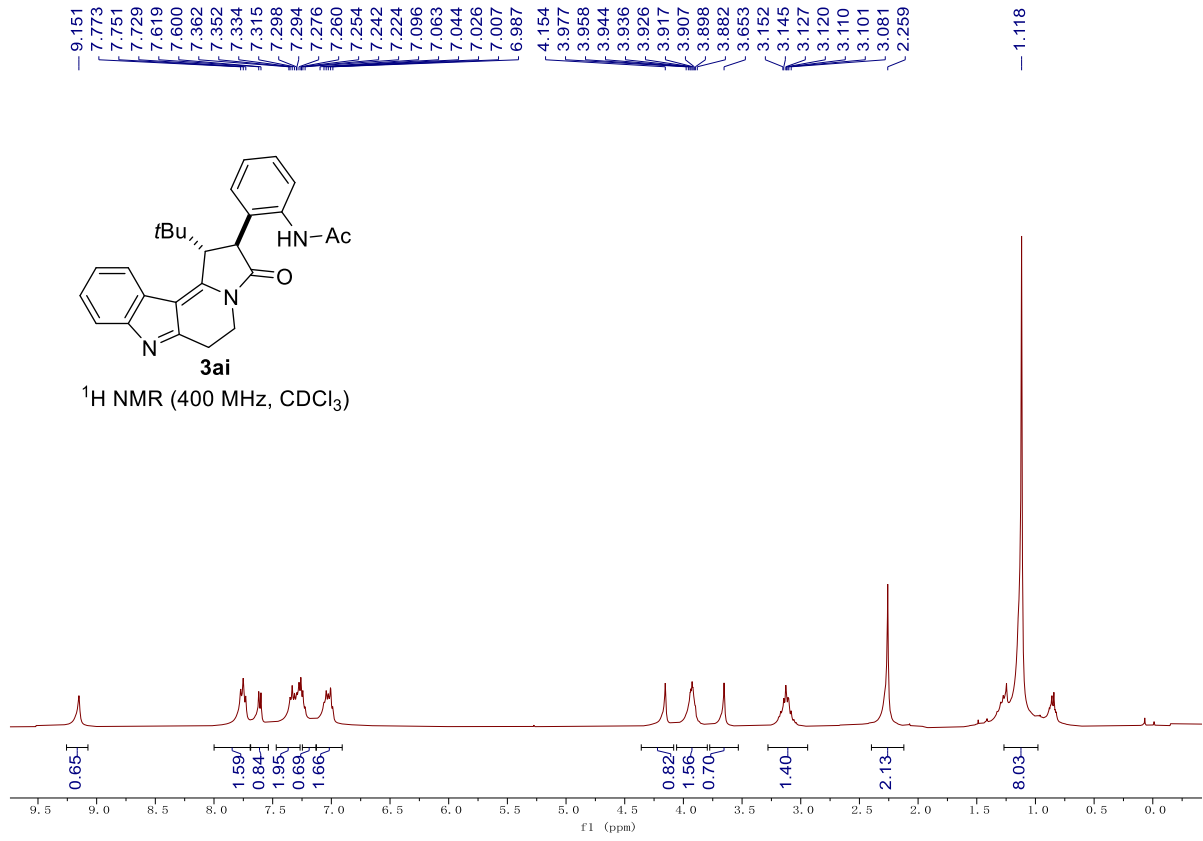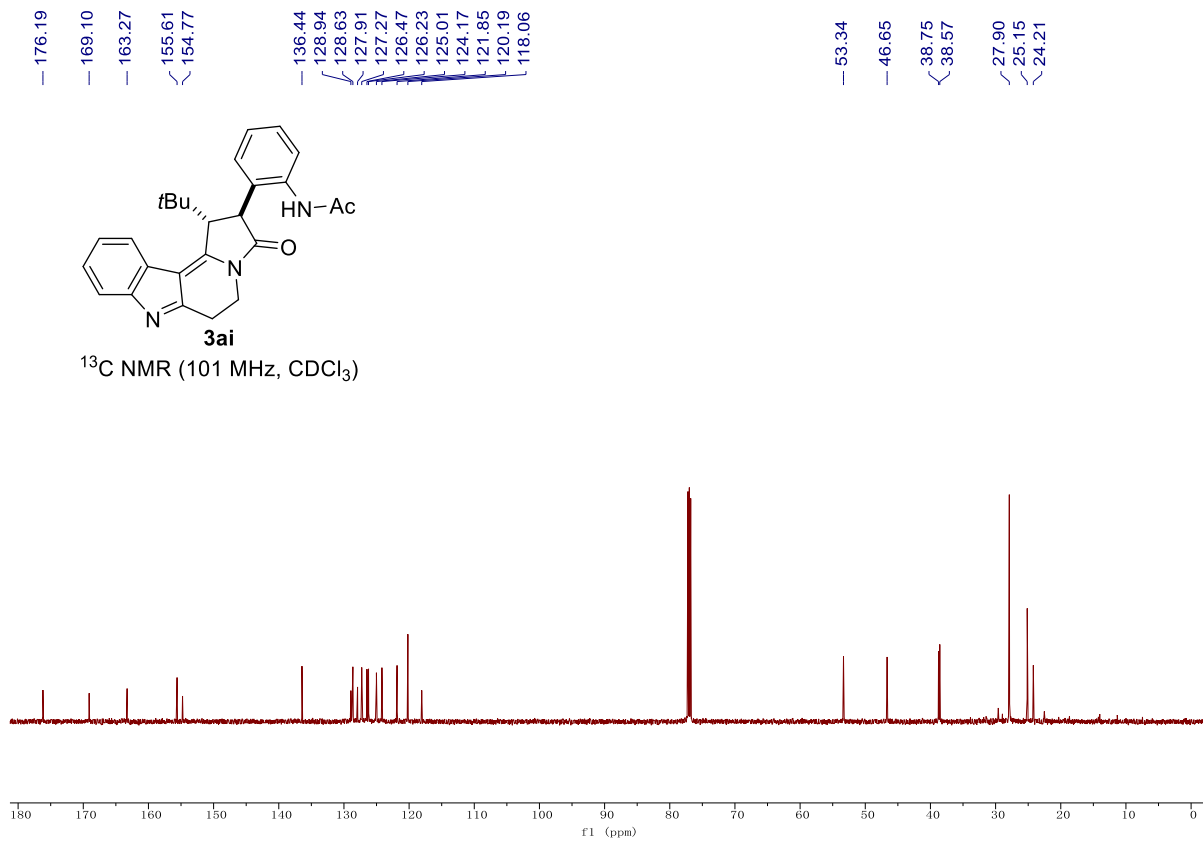

7.732  
7.720  
7.695  
7.682  
7.630  
7.617  
7.353  
7.351  
7.340  
7.338  
7.330  
7.327  
7.325  
7.317  
7.314  
7.304  
7.301  
7.256  
7.254  
7.243  
7.242  
7.231  
7.229  
7.114  
7.111  
7.101  
7.099  
7.088  
7.086  
7.046  
7.043  
7.032  
7.030  
4.853  
4.833  
4.702  
4.682  
4.195  
3.960  
3.957  
3.949  
3.947  
3.935  
3.924  
3.913  
3.641  
3.163  
3.151  
3.146  
3.134  
3.122  
3.111  
3.108  
3.097  
3.083  
3.082  
3.079  
1.129

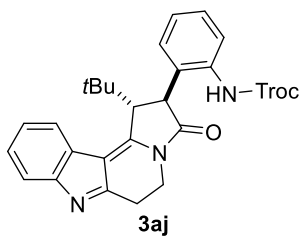

$^1\text{H NMR}$  (600 MHz,  $\text{CDCl}_3$ )

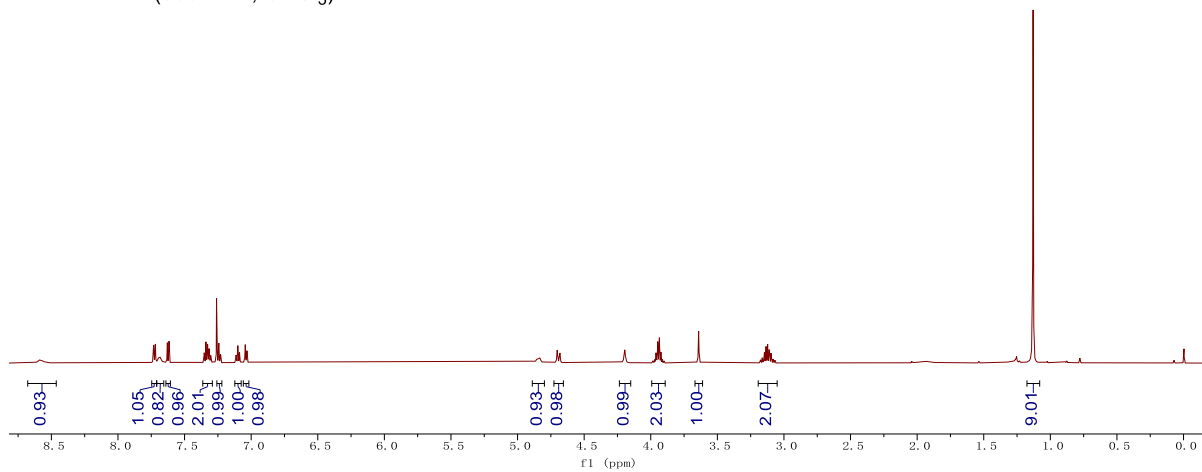

175.94  
163.42  
155.78  
154.72  
152.95  
135.79  
129.82  
128.87  
128.01  
127.29  
126.59  
125.98  
125.53  
124.14  
121.90  
120.32  
118.08  
95.42  
74.53  
53.37  
46.73  
38.92  
38.66  
27.92  
25.25

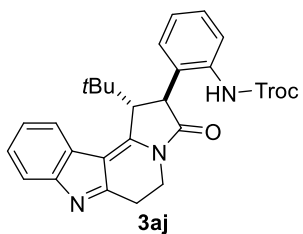

$^{13}\text{C NMR}$  (151 MHz,  $\text{CDCl}_3$ )

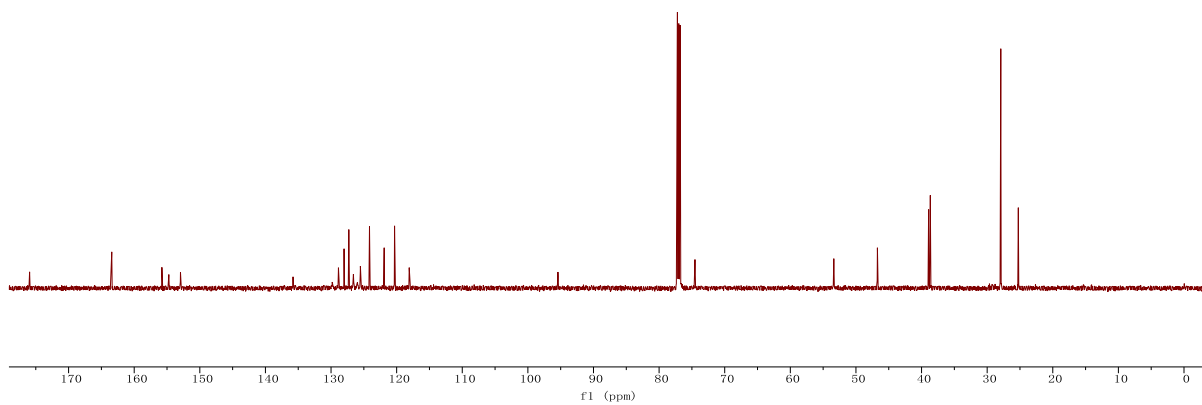



7.737  
7.724  
7.617  
7.604  
7.427  
7.424  
7.413  
7.398  
7.397  
7.385  
7.375  
7.372  
7.356  
7.353  
7.351  
7.342  
7.336  
7.333  
7.323  
7.321  
7.310  
7.308  
7.300  
7.297  
7.288  
7.285  
7.275  
7.272  
7.251  
7.249  
7.238  
7.236  
7.226  
7.050  
7.048  
7.038  
7.036  
7.022  
7.019  
7.009  
7.006  
5.195  
5.175  
5.121  
5.117  
5.114  
4.159  
3.926  
3.915  
3.912  
3.901  
3.886  
3.630  
3.108  
3.105  
3.095  
3.084  
1.109

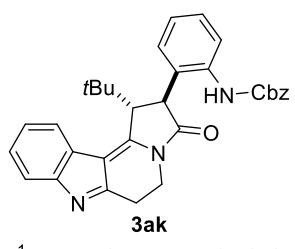

<sup>1</sup>H NMR (600 MHz, CDCl<sub>3</sub>)

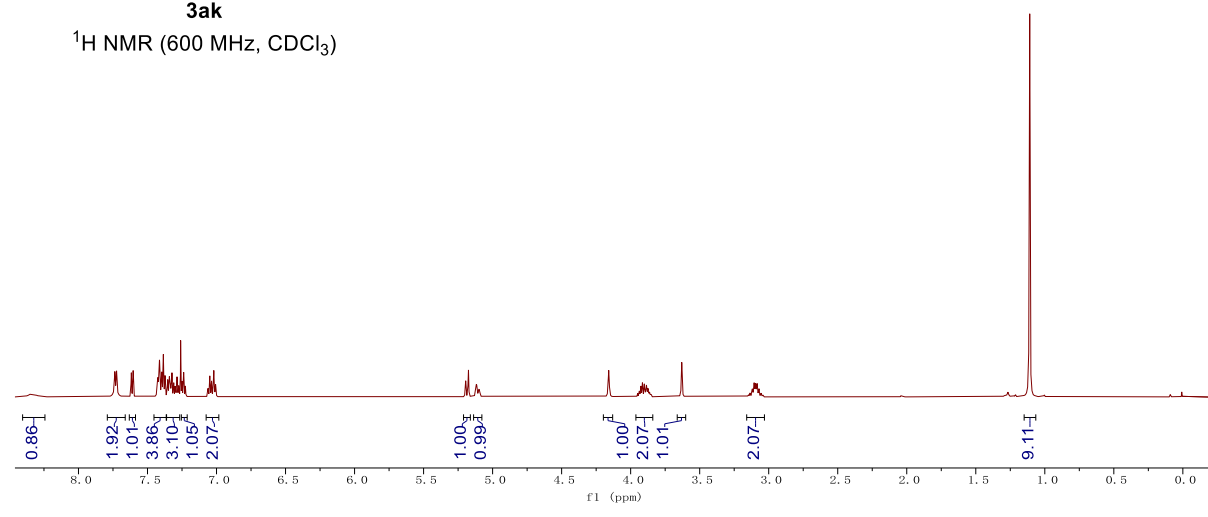

175.87  
163.41  
155.65  
155.07  
155.04  
154.51  
154.49  
136.44  
136.08  
129.40  
128.87  
128.67  
128.46  
128.20  
128.16  
128.04  
127.09  
125.86  
125.44  
123.99  
121.87  
120.17  
117.82  
67.03  
53.57  
53.54  
46.68  
38.79  
38.57  
27.86  
25.15

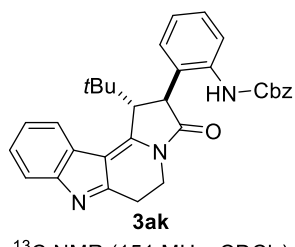

<sup>13</sup>C NMR (151 MHz, CDCl<sub>3</sub>)

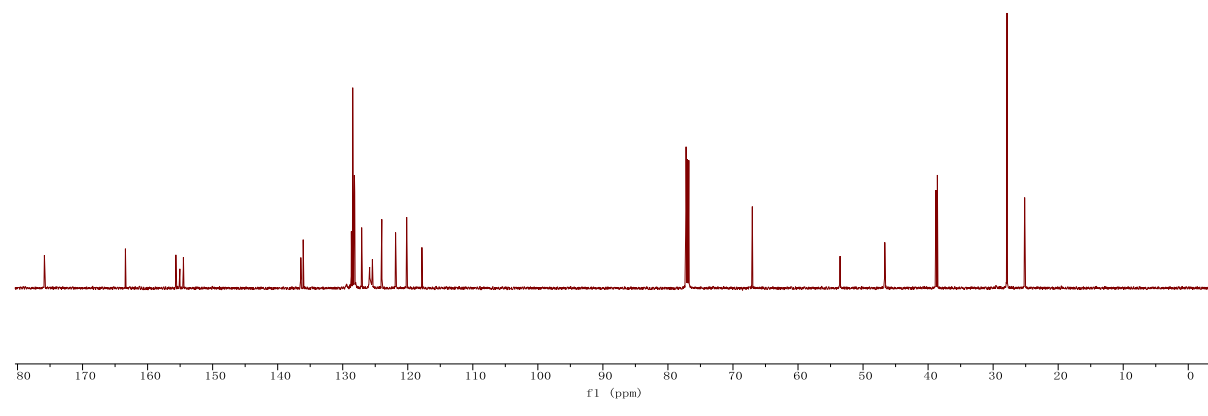

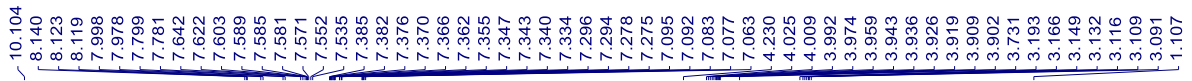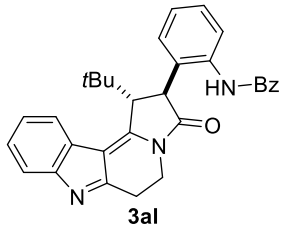

<sup>1</sup>H NMR (400 MHz, CDCl<sub>3</sub>)

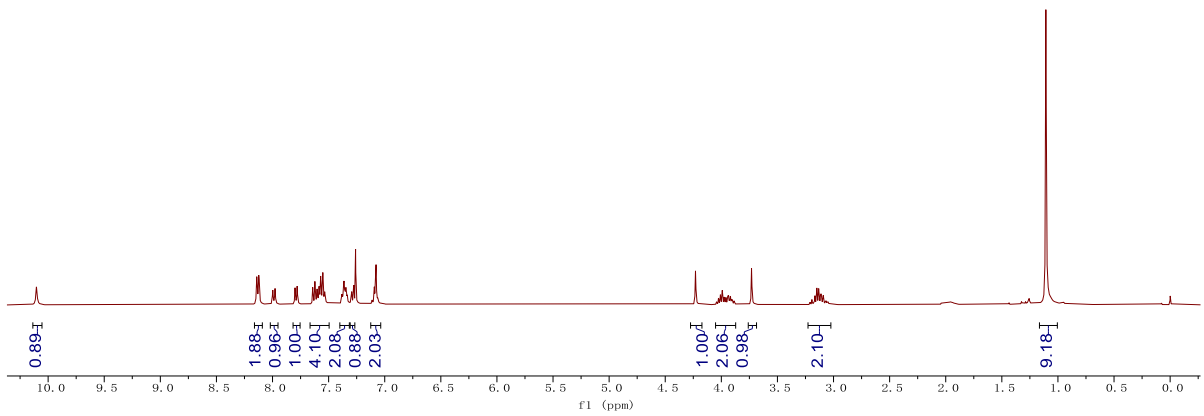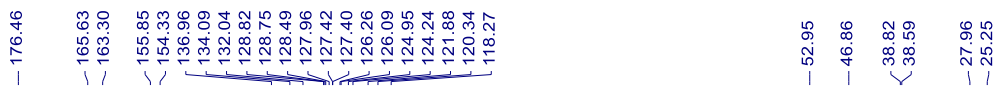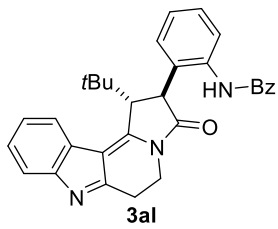

<sup>13</sup>C NMR (101 MHz, CDCl<sub>3</sub>)

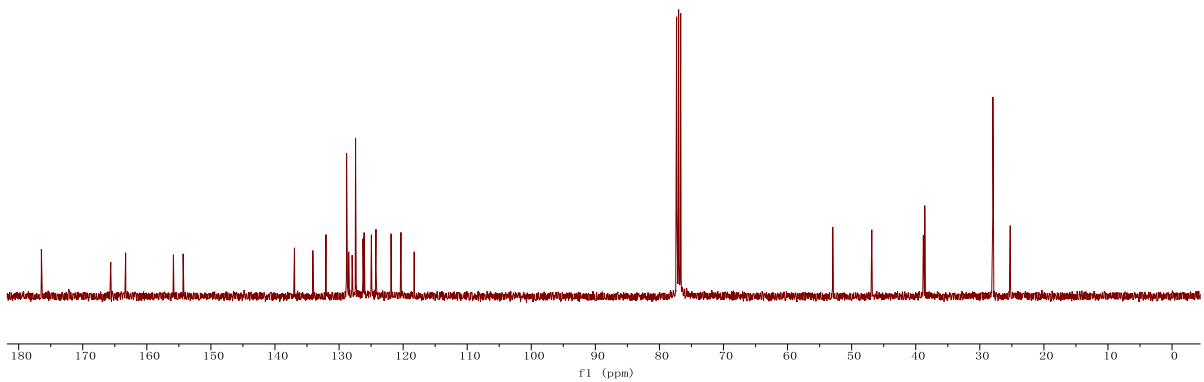

7.782  
7.761  
7.709  
7.691  
7.614  
7.595  
7.423  
7.419  
7.402  
7.399  
7.350  
7.347  
7.331  
7.328  
7.312  
7.309  
7.292  
7.272  
7.249  
7.246  
7.228  
7.209  
7.190  
7.186  
7.076  
7.073  
7.057  
7.054  
7.038  
7.035  
6.965  
6.961  
6.945  
6.941  
4.038  
3.948  
3.931  
3.914  
3.902  
3.896  
3.885  
3.879  
3.868  
3.862  
3.845  
3.556  
3.153  
3.127  
3.110  
3.092  
3.087  
3.070  
3.064  
3.047  
3.043  
3.020  
2.402  
0.964

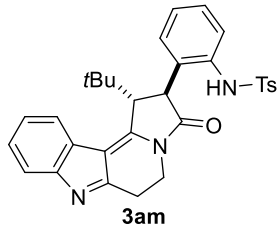

<sup>1</sup>H NMR (400 MHz, CDCl<sub>3</sub>)

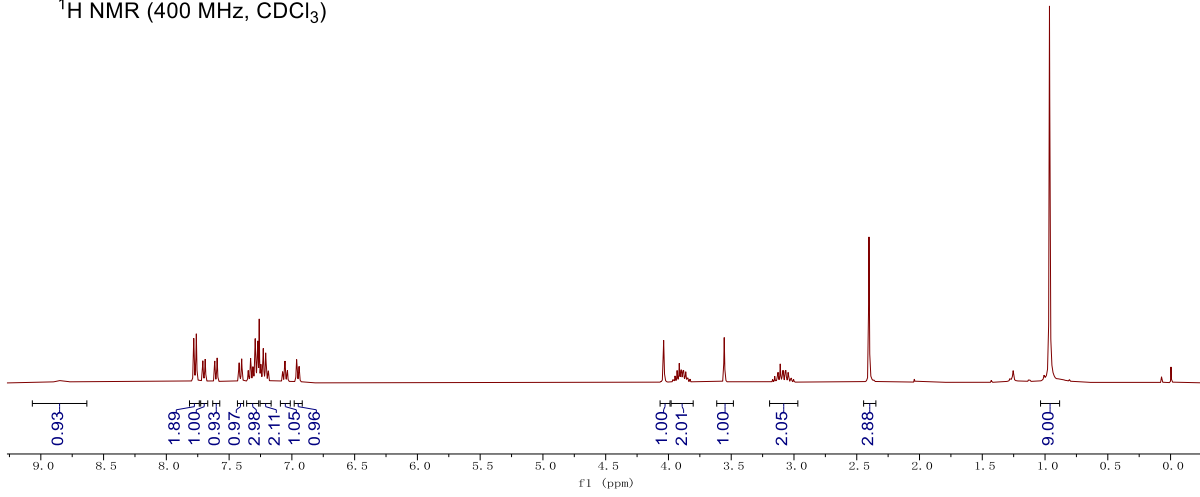

175.84  
163.38  
155.80  
154.41  
143.72  
138.25  
135.90  
130.31  
129.88  
128.88  
127.97  
127.28  
126.93  
126.91  
126.46  
125.20  
124.11  
121.69  
120.32  
118.03

52.69  
46.35  
38.77  
38.44  
27.68  
25.20  
21.46

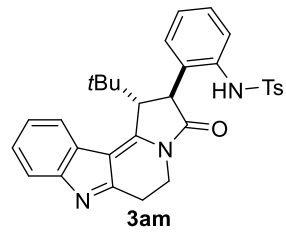

<sup>13</sup>C NMR (101 MHz, CDCl<sub>3</sub>)

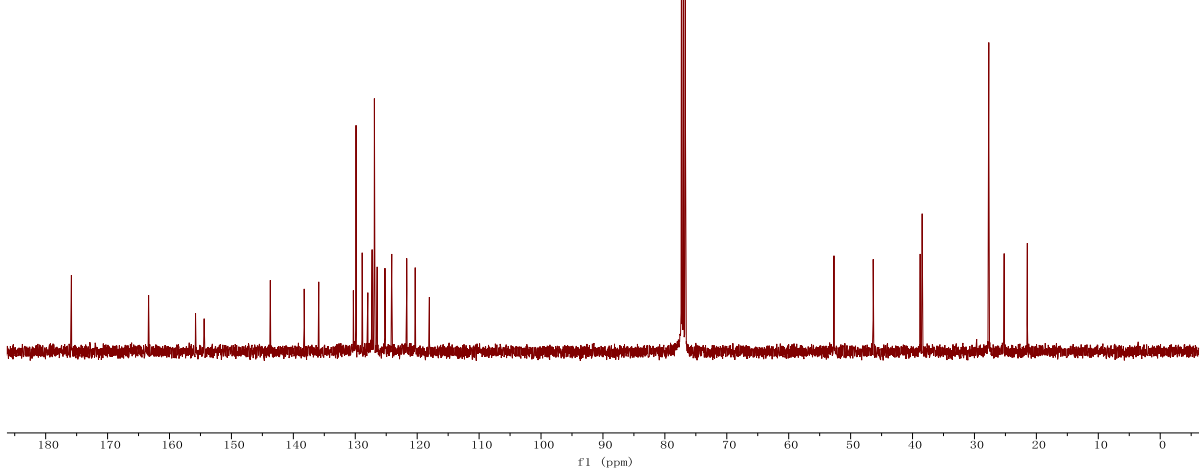

8.917  
7.909  
7.896  
7.706  
7.693  
7.608  
7.595  
7.583  
7.571  
7.559  
7.512  
7.499  
7.486  
7.399  
7.386  
7.339  
7.326  
7.314  
7.240  
7.228  
7.220  
7.216  
7.207  
7.194  
7.076  
7.063  
7.050  
6.969  
6.956  
4.068  
3.956  
3.944  
3.933  
3.922  
3.910  
3.895  
3.884  
3.880  
3.873  
3.869  
3.862  
3.846  
3.559  
3.157  
3.145  
3.134  
3.128  
3.116  
3.105  
3.080  
3.069  
3.064  
3.052  
3.039  
3.035  
3.024  
0.967

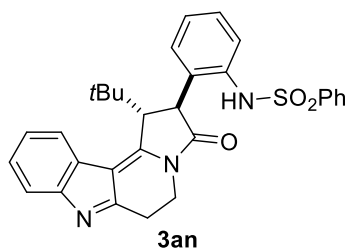

<sup>1</sup>H NMR (600 MHz, CDCl<sub>3</sub>)

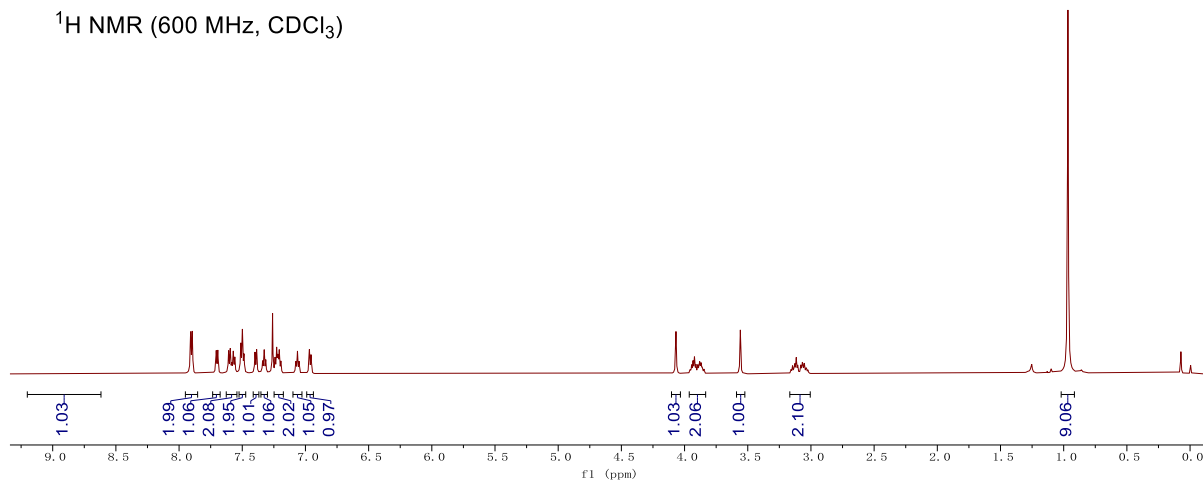

175.85  
163.38  
155.78  
154.36  
141.15  
135.78  
132.86  
130.39  
129.29  
128.90  
127.95  
127.29  
127.01  
126.88  
126.87  
126.37  
125.26  
124.12  
121.70  
120.31  
118.06  
52.68  
46.36  
38.77  
38.47  
27.76  
25.20

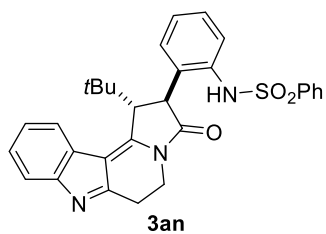

<sup>13</sup>C NMR (151 MHz, CDCl<sub>3</sub>)

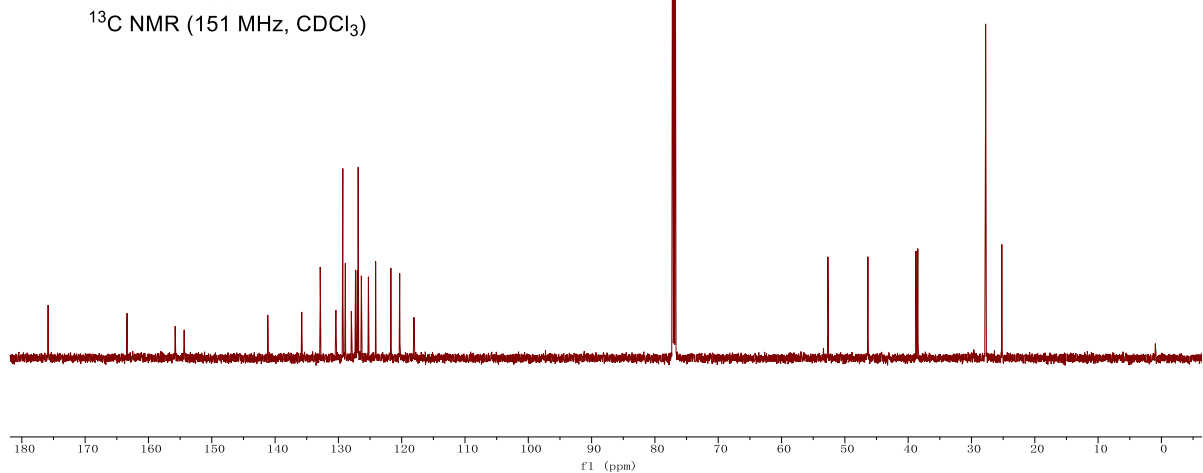

— 11.211

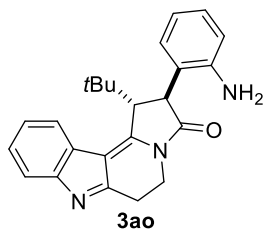

<sup>1</sup>H NMR (400 MHz, DMSO-*d*<sub>6</sub>)

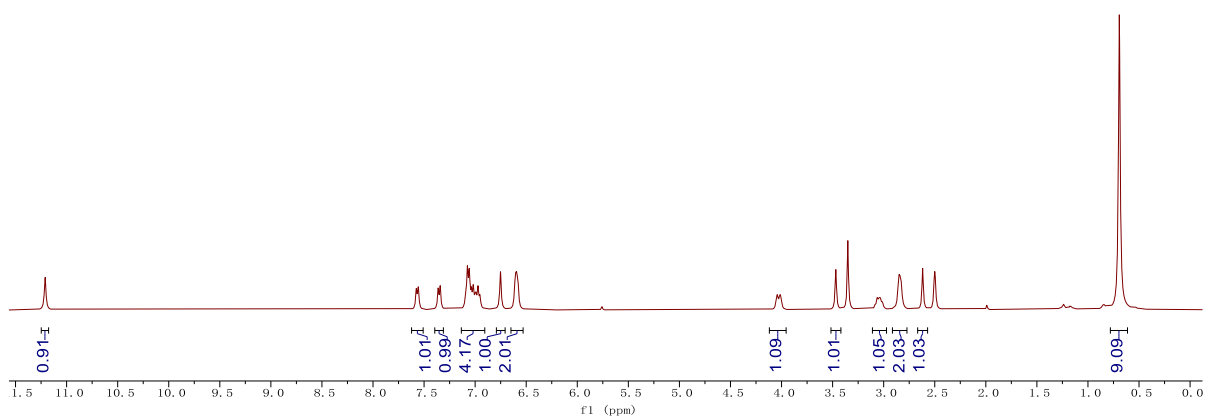

— 170.51

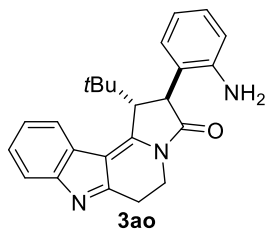

<sup>13</sup>C NMR (101 MHz, DMSO-*d*<sub>6</sub>)

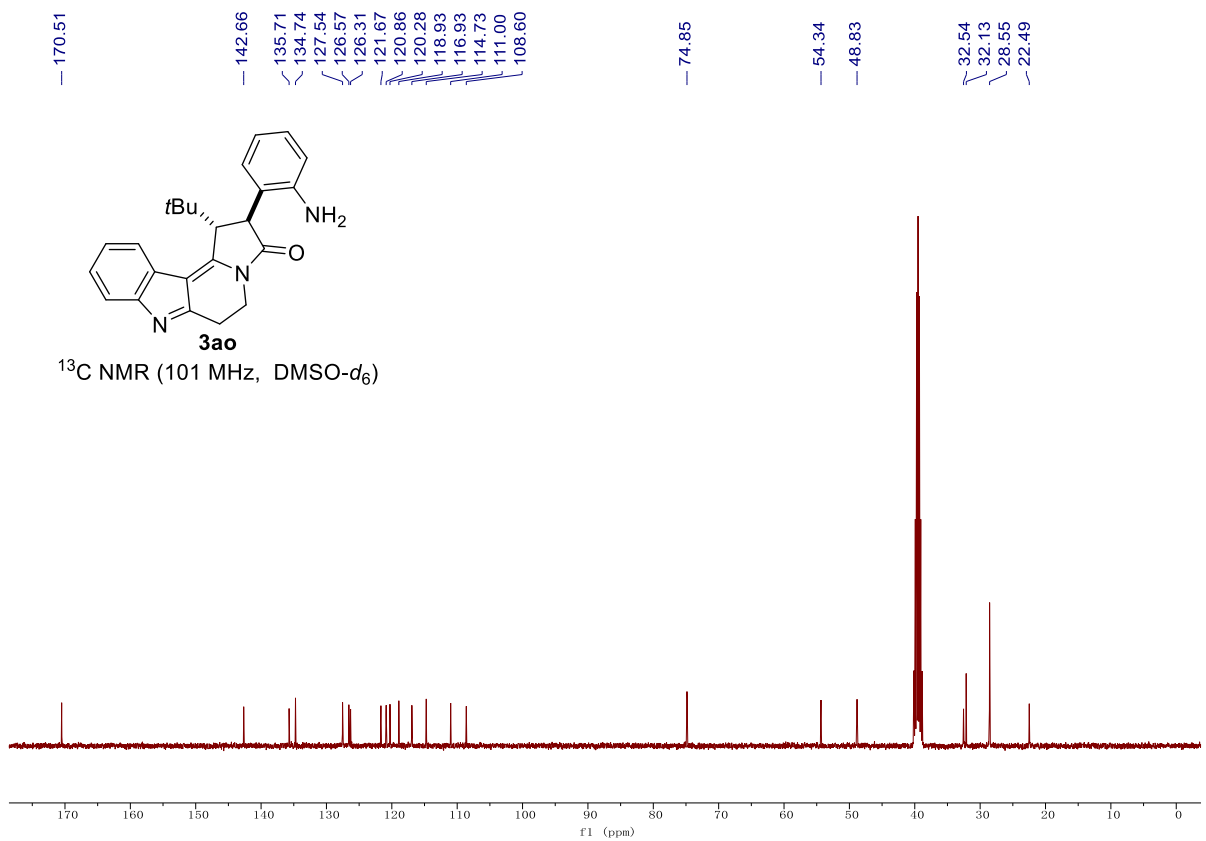

8.417  
7.565  
7.563  
7.546  
7.543  
7.383  
7.381  
7.378  
7.363  
7.360  
7.358  
7.233  
7.230  
7.224  
7.220  
7.215  
7.212  
7.209  
7.205  
7.200  
7.194  
7.192  
7.185  
7.181  
7.174  
7.170  
7.154  
7.151  
7.136  
7.134  
7.131  
7.116  
7.113  
6.811  
6.791  
6.773  
6.771  
6.771  
4.439  
4.436  
4.423  
4.420  
3.575  
3.070  
3.061  
3.046  
3.044  
3.040  
3.022  
3.009  
2.852  
2.846  
2.843  
2.817  
2.815  
2.806  
2.795  
2.726  
0.682

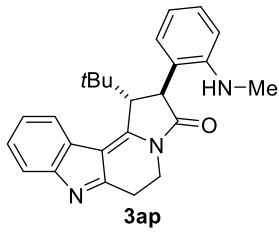

$^1\text{H NMR}$  (400 MHz,  $\text{CDCl}_3$ )

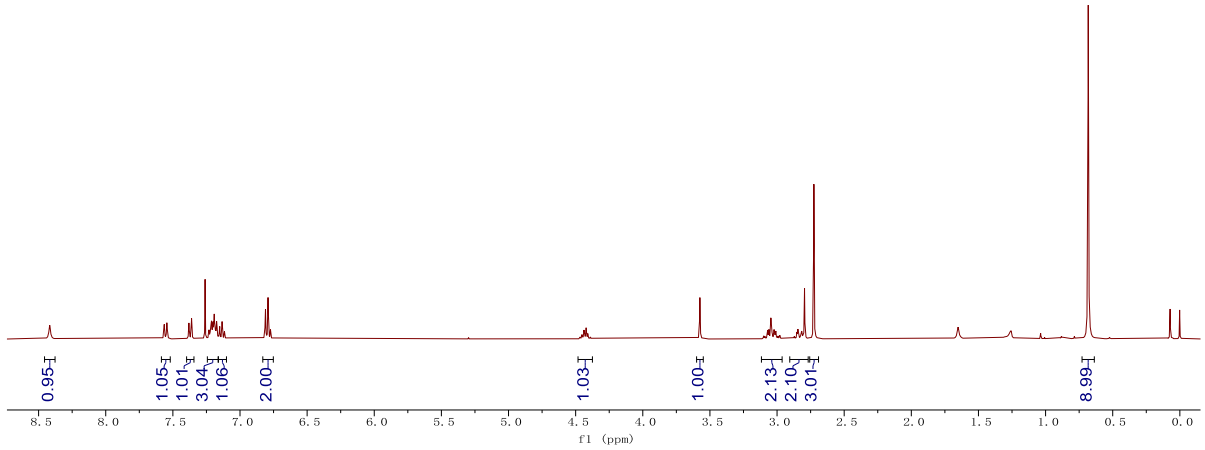

172.30  
144.93  
135.71  
134.30  
128.37  
127.02  
126.46  
123.60  
122.37  
120.66  
120.50  
118.46  
114.57  
110.94  
108.97  
80.79  
56.77  
49.91  
35.64  
35.27  
32.98  
28.74  
22.93

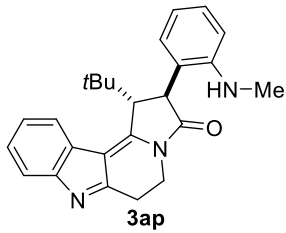

$^{13}\text{C NMR}$  (151 MHz,  $\text{CDCl}_3$ )

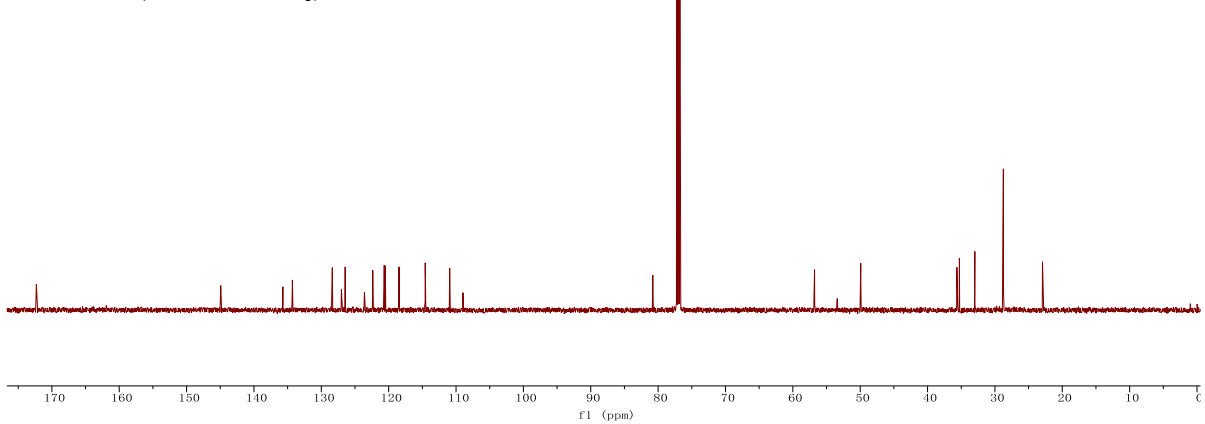

7.863  
7.756  
7.742  
7.540  
7.532  
7.526  
7.518  
7.399  
7.395  
7.385  
7.381  
7.290  
7.288  
7.278  
7.275  
7.048  
7.044  
7.033  
7.029  
7.018  
7.015  
7.005  
7.002  
6.941  
6.939  
6.928  
6.925  
4.176  
3.985  
3.974  
3.971  
3.963  
3.960  
3.951  
3.949  
3.937  
3.924  
3.913  
3.903  
3.901  
3.890  
3.857  
3.164  
3.152  
3.140  
3.136  
3.124  
3.122  
3.110  
3.107  
3.096  
3.092  
3.080  
3.078  
3.067  
1.531  
1.137

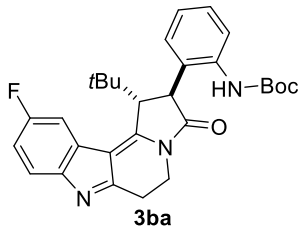

$^1\text{H NMR}$  (600 MHz,  $\text{CDCl}_3$ )

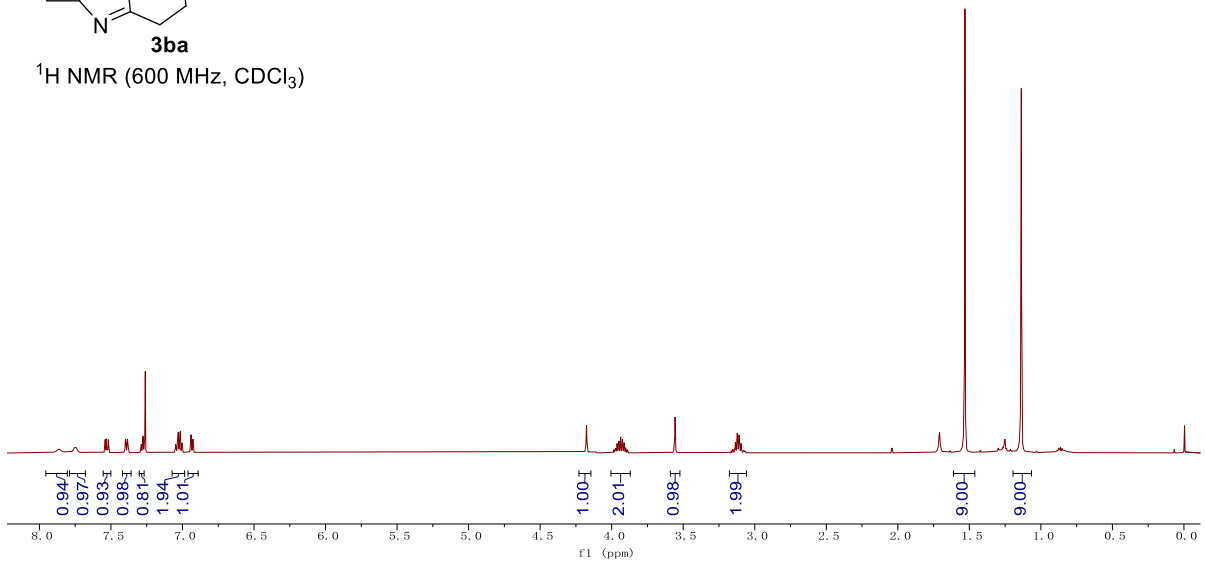

175.98  
163.34  
161.13  
159.53  
156.39  
153.79  
151.95  
137.00  
129.29  
129.22  
128.69  
125.42  
124.98  
120.74  
120.68  
117.62  
113.87  
113.71  
108.95  
108.78  
80.69  
53.85  
46.49  
38.88  
38.70  
28.32  
28.03  
25.24

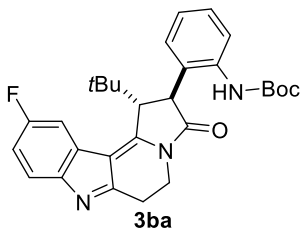

$^{13}\text{C NMR}$  (151 MHz,  $\text{CDCl}_3$ )

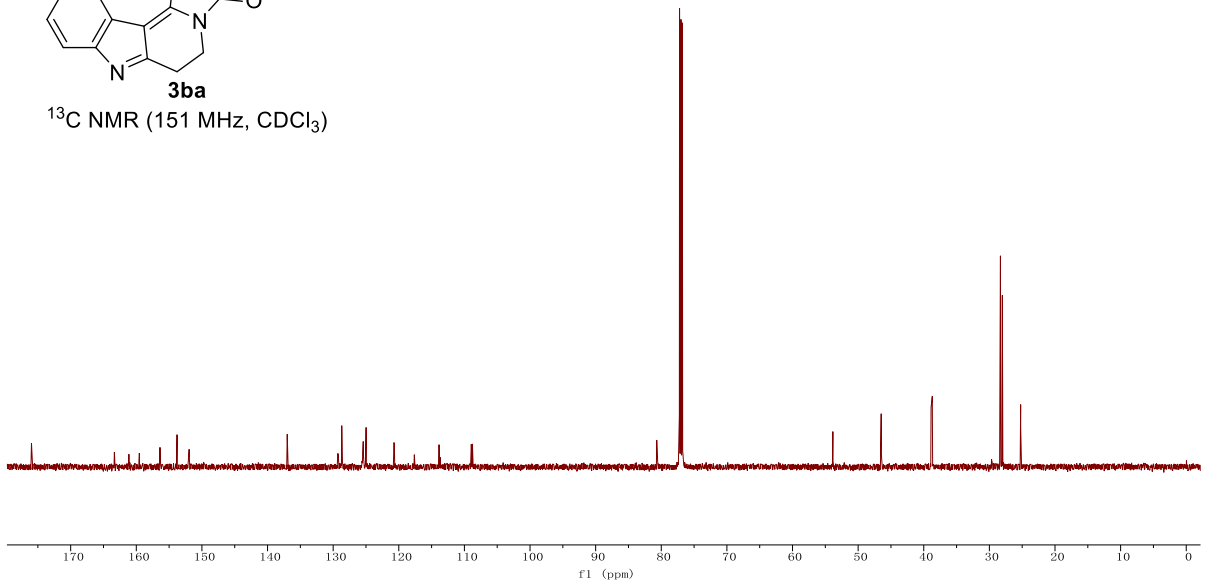

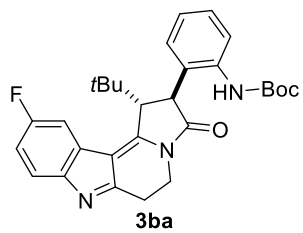

$^{19}\text{F}$  NMR (565 MHz,  $\text{CDCl}_3$ )

— -118.637

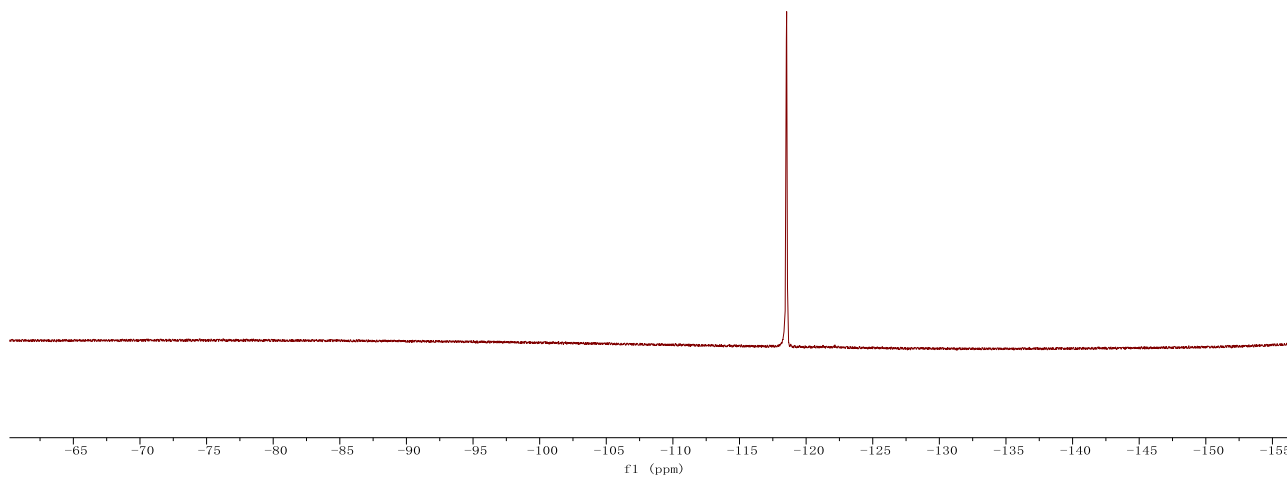



7.827  
7.752  
7.739  
7.651  
7.648  
7.529  
7.515  
7.299  
7.296  
7.293  
7.286  
7.282  
7.270  
7.268  
7.046  
7.044  
7.033  
7.031  
7.021  
7.018  
6.944  
6.941  
6.930  
6.928  
4.184  
3.997  
3.986  
3.983  
3.974  
3.972  
3.963  
3.961  
3.949  
3.934  
3.922  
3.920  
3.910  
3.899  
3.887  
3.573  
3.174  
3.163  
3.149  
3.145  
3.134  
3.132  
3.123  
3.120  
3.109  
3.105  
3.094  
3.092  
3.080  
1.530  
1.135

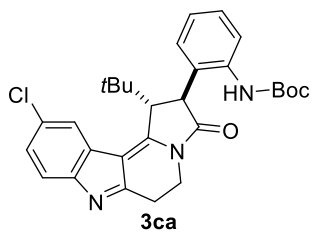

$^1\text{H NMR}$  (600 MHz,  $\text{CDCl}_3$ )

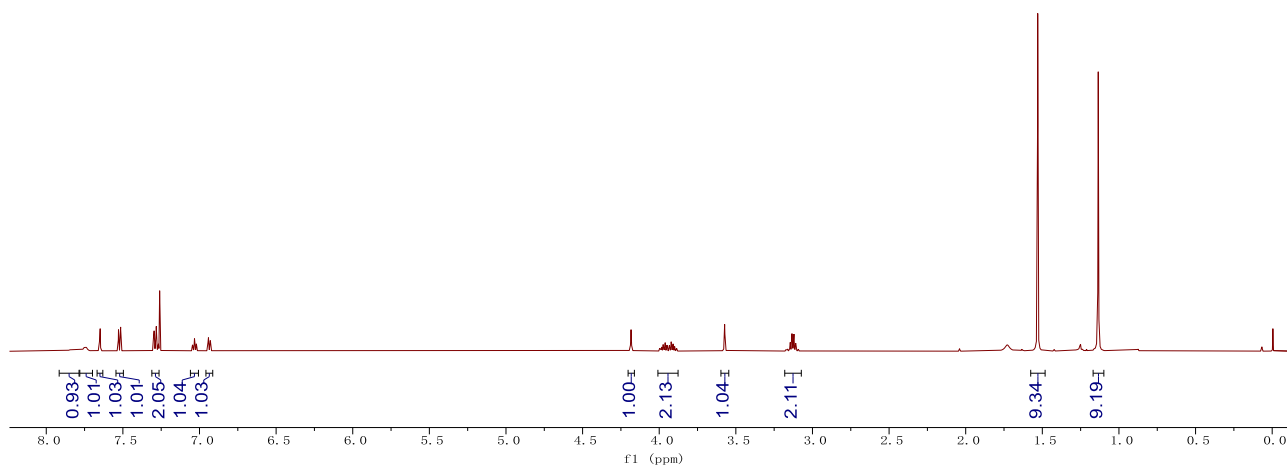

175.99  
163.71  
156.82  
154.18  
153.79  
136.97  
129.73  
129.61  
128.72  
126.96  
125.48  
125.03  
121.74  
120.97  
117.10  
80.71  
53.94  
46.48  
38.83  
38.74  
28.32  
28.05  
25.22

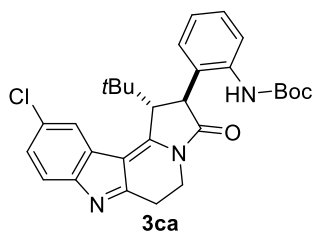

$^{13}\text{C NMR}$  (151 MHz,  $\text{CDCl}_3$ )

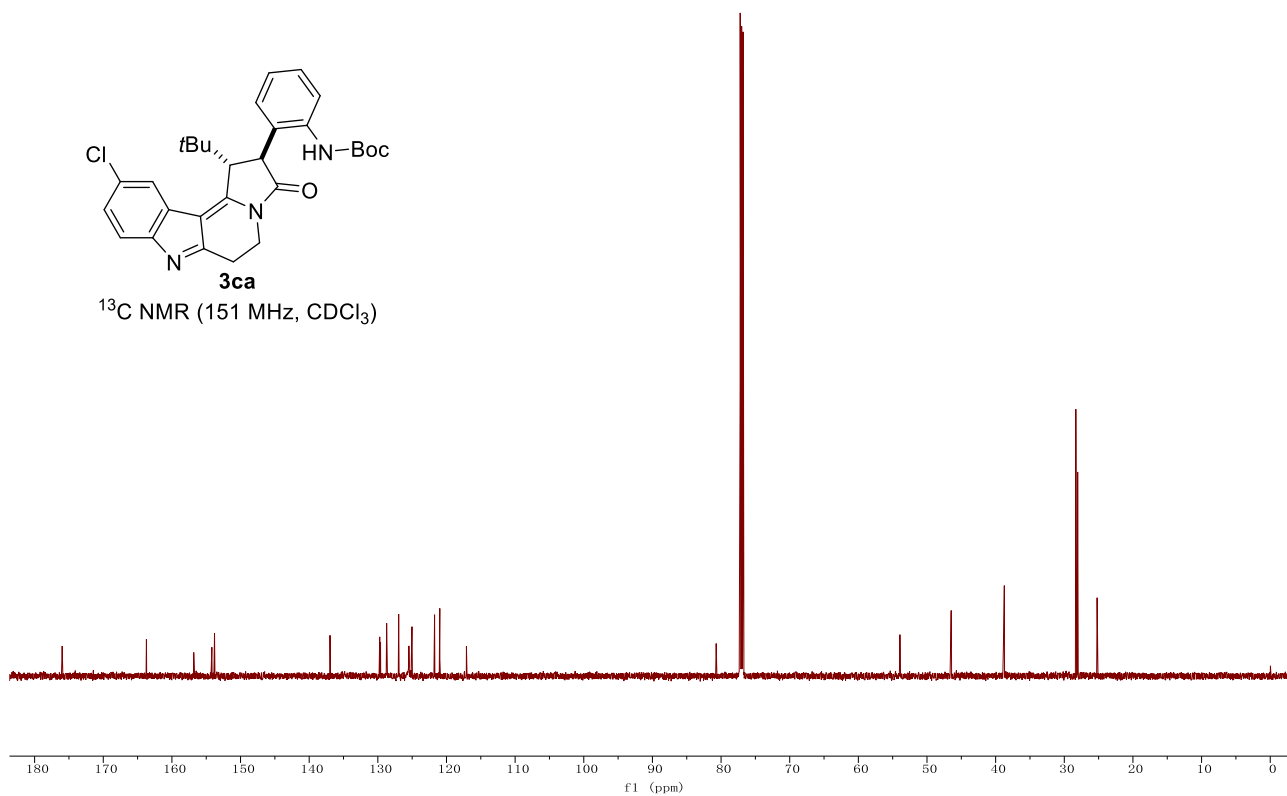

7.818  
7.797  
7.794  
7.750  
7.739  
7.482  
7.468  
7.443  
7.440  
7.429  
7.426  
7.297  
7.295  
7.285  
7.282  
7.272  
7.269  
7.052  
7.050  
7.039  
7.037  
7.026  
7.024  
6.941  
6.929  
4.185  
3.997  
3.986  
3.983  
3.974  
3.972  
3.963  
3.961  
3.949  
3.933  
3.921  
3.909  
3.898  
3.886  
3.568  
3.167  
3.155  
3.138  
3.128  
3.125  
3.117  
3.114  
3.104  
3.088  
3.075  
1.529  
1.132

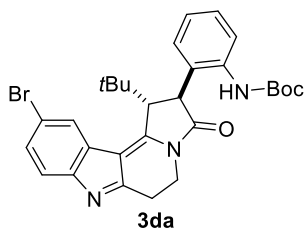

$^1\text{H NMR}$  (600 MHz,  $\text{CDCl}_3$ )

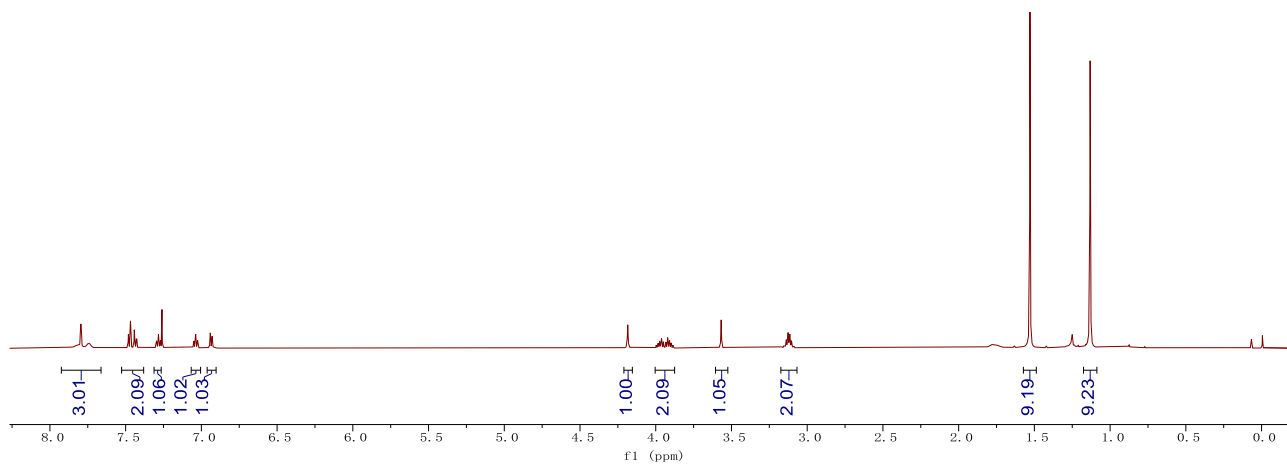

175.34  
163.28  
155.75  
153.85  
153.52  
136.31  
131.60  
130.55  
128.31  
127.98  
127.31  
126.72  
124.25  
121.83  
120.28  
118.32  
117.91  
80.97  
53.34  
46.34  
38.95  
38.78  
28.25  
28.02  
25.19

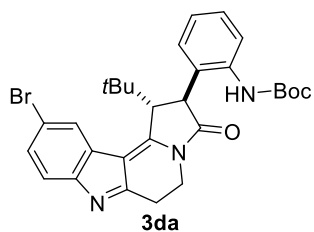

$^{13}\text{C NMR}$  (151 MHz,  $\text{CDCl}_3$ )

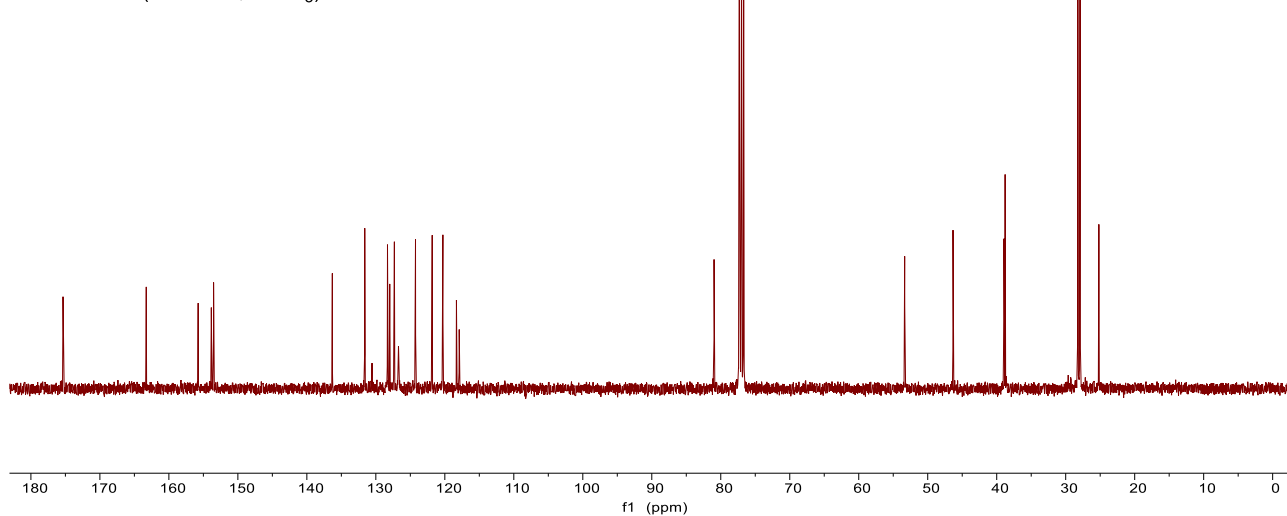

7.973  
7.762  
7.749  
7.502  
7.495  
7.482  
7.279  
7.277  
7.265  
7.254  
7.251  
7.148  
7.147  
7.145  
7.135  
7.134  
7.132  
7.131  
7.022  
7.019  
7.009  
7.006  
6.996  
6.994  
6.980  
6.977  
6.966  
6.964  
4.164  
3.933  
3.921  
3.908  
3.599  
3.152  
3.140  
3.128  
3.123  
3.111  
3.102  
3.099  
3.089  
3.077  
3.073  
3.060  
3.048  
2.464  
1.541  
1.135

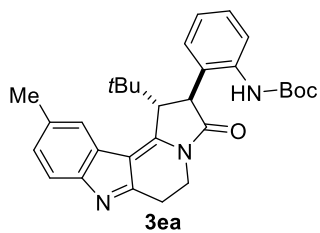

$^1\text{H NMR}$  (600 MHz,  $\text{CDCl}_3$ )

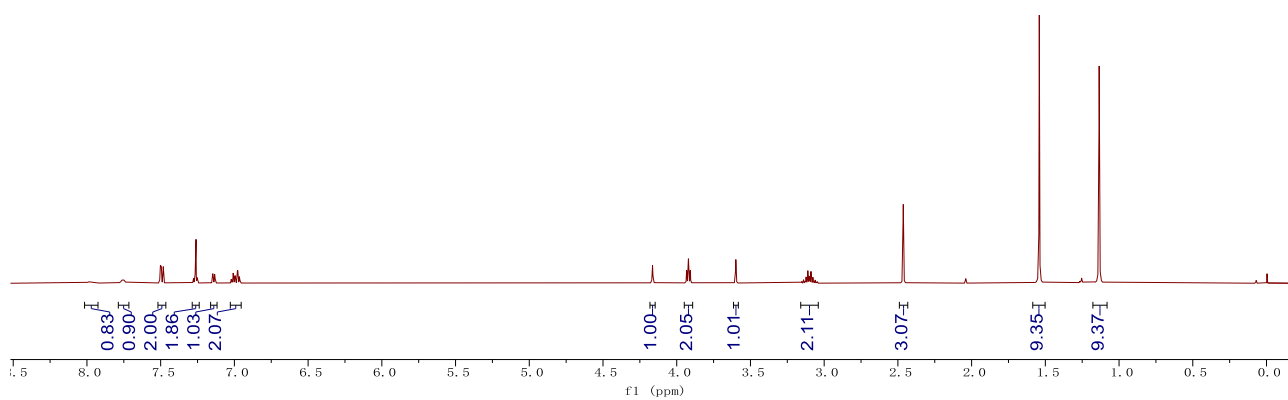

176.05  
163.43  
155.67  
155.37  
153.99  
135.17  
134.16  
129.22  
128.25  
127.01  
125.74  
124.06  
121.75  
120.18  
117.80  
80.41  
53.72  
46.47  
38.89  
38.69  
28.28  
26.72  
25.26  
21.15

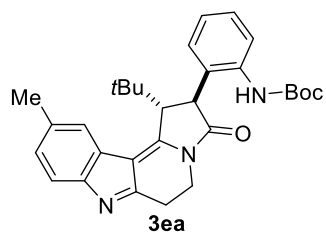

$^{13}\text{C NMR}$  (151 MHz,  $\text{CDCl}_3$ )

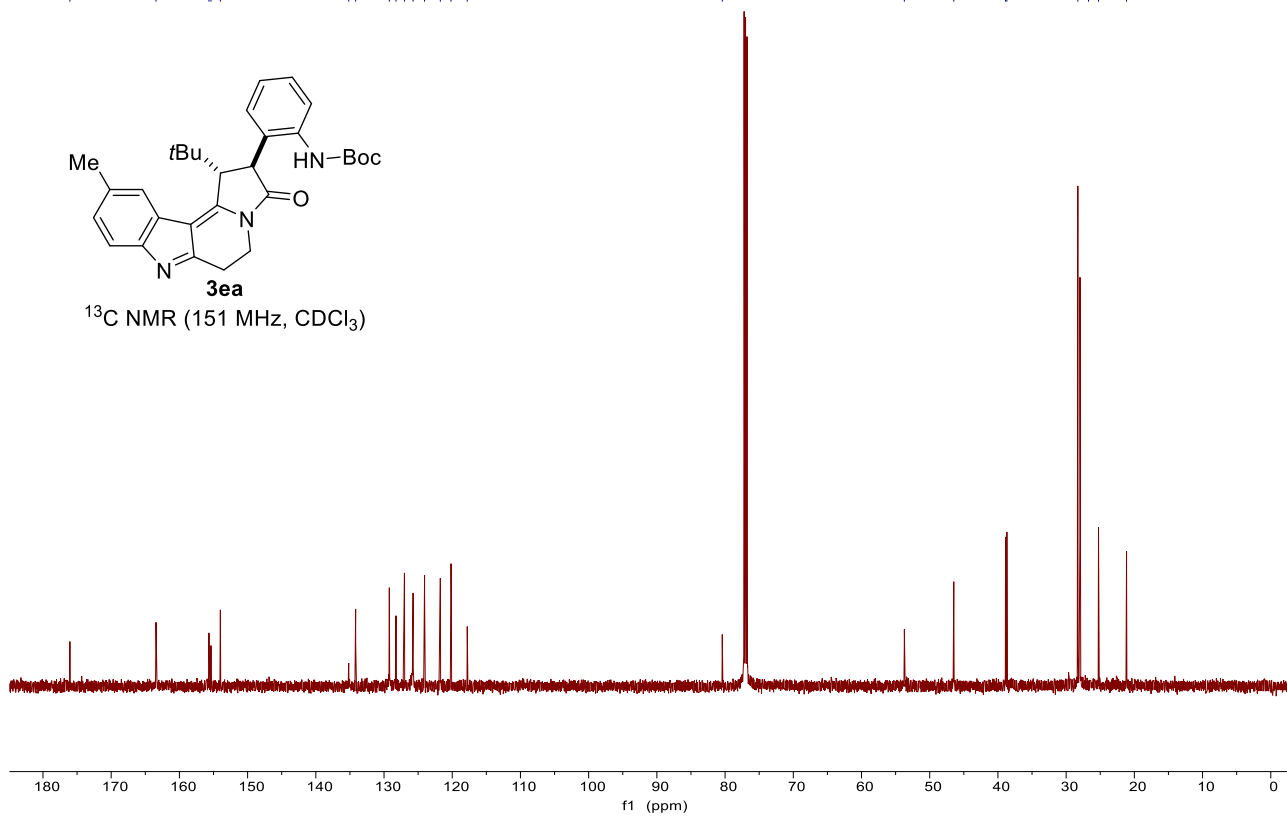

7.826  
7.740  
7.726  
7.619  
7.605  
7.594  
7.590  
7.281  
7.279  
7.269  
7.266  
7.256  
7.253  
7.210  
7.206  
7.196  
7.193  
7.019  
7.016  
7.006  
7.004  
6.993  
6.991  
6.937  
6.935  
6.924  
6.922  
4.171  
3.995  
3.983  
3.981  
3.972  
3.969  
3.961  
3.959  
3.947  
3.927  
3.916  
3.914  
3.903  
3.893  
3.880  
3.570  
3.180  
3.168  
3.155  
3.151  
3.140  
3.138  
3.129  
3.126  
3.115  
3.111  
3.100  
3.098  
3.086  
1.522  
1.120

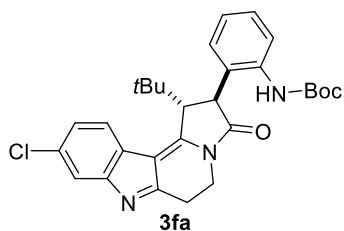

$^1\text{H NMR}$  (600 MHz,  $\text{CDCl}_3$ )

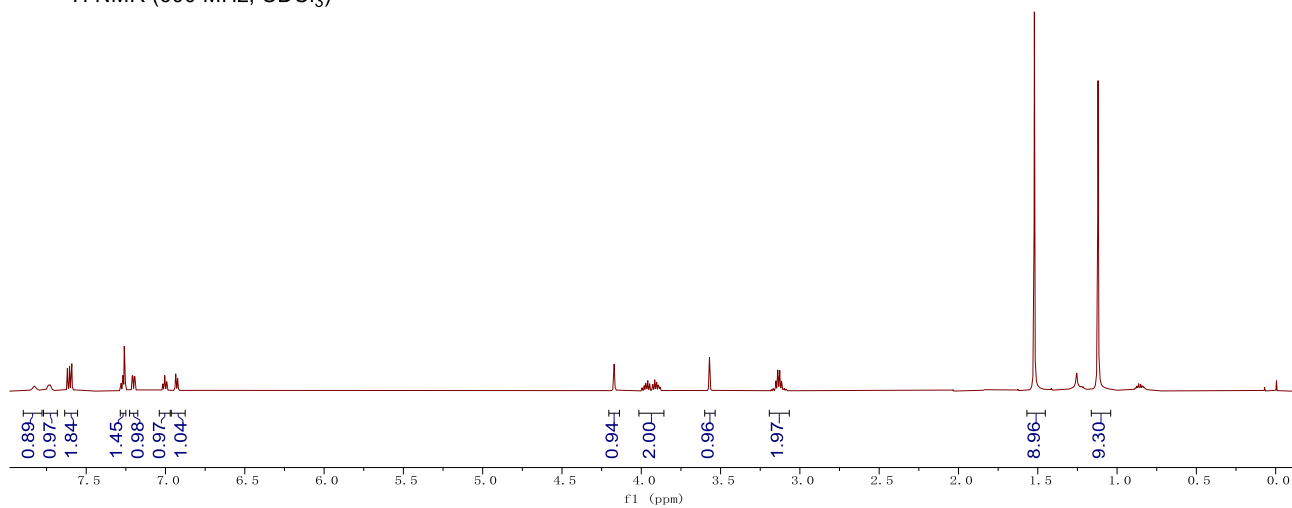

175.90  
164.86  
156.82  
156.17  
153.80  
136.95  
132.62  
128.83  
128.66  
126.60  
125.65  
125.44  
125.02  
124.04  
122.15  
120.59  
117.05

80.67

53.94

46.49

38.79  
38.68

28.29  
27.99  
25.28

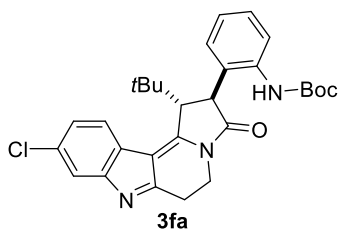

$^{13}\text{C NMR}$  (151 MHz,  $\text{CDCl}_3$ )

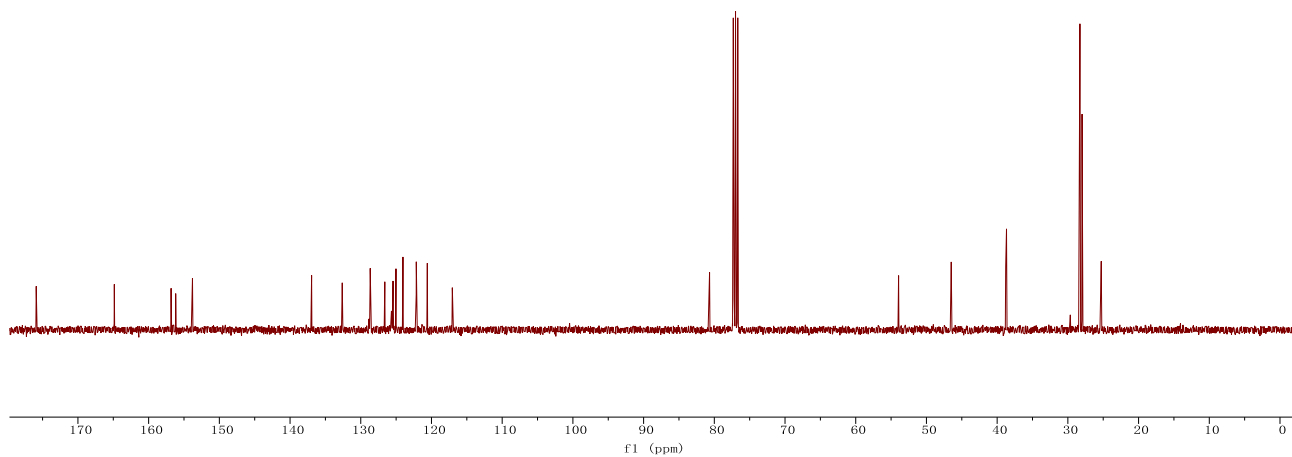



— 11.347

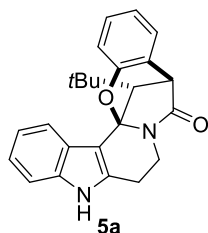

<sup>1</sup>H NMR (400 MHz, DMSO-*d*<sub>6</sub>)

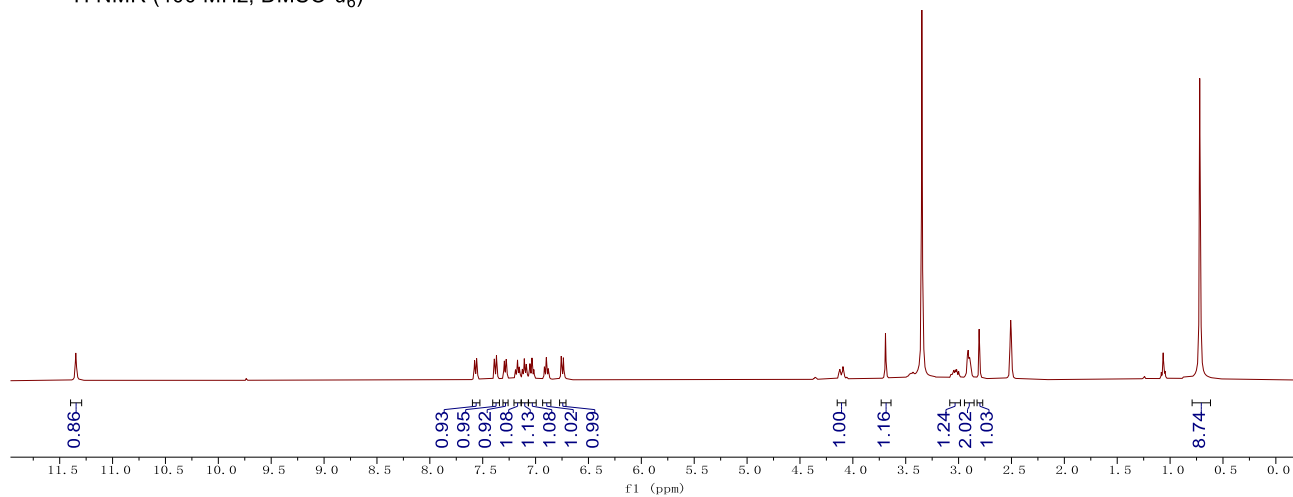

— 172.56

— 153.00

135.73, 135.40, 128.61, 126.97, 126.13, 123.86, 121.14, 120.29, 119.92, 119.32, 116.16, 111.15, 106.92

— 93.55

— 54.39

— 46.66

— 33.60

— 32.24

— 28.17

— 21.87

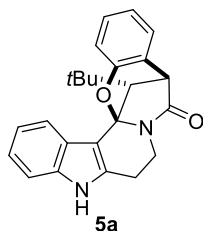

<sup>13</sup>C NMR (151 MHz, DMSO-*d*<sub>6</sub>)

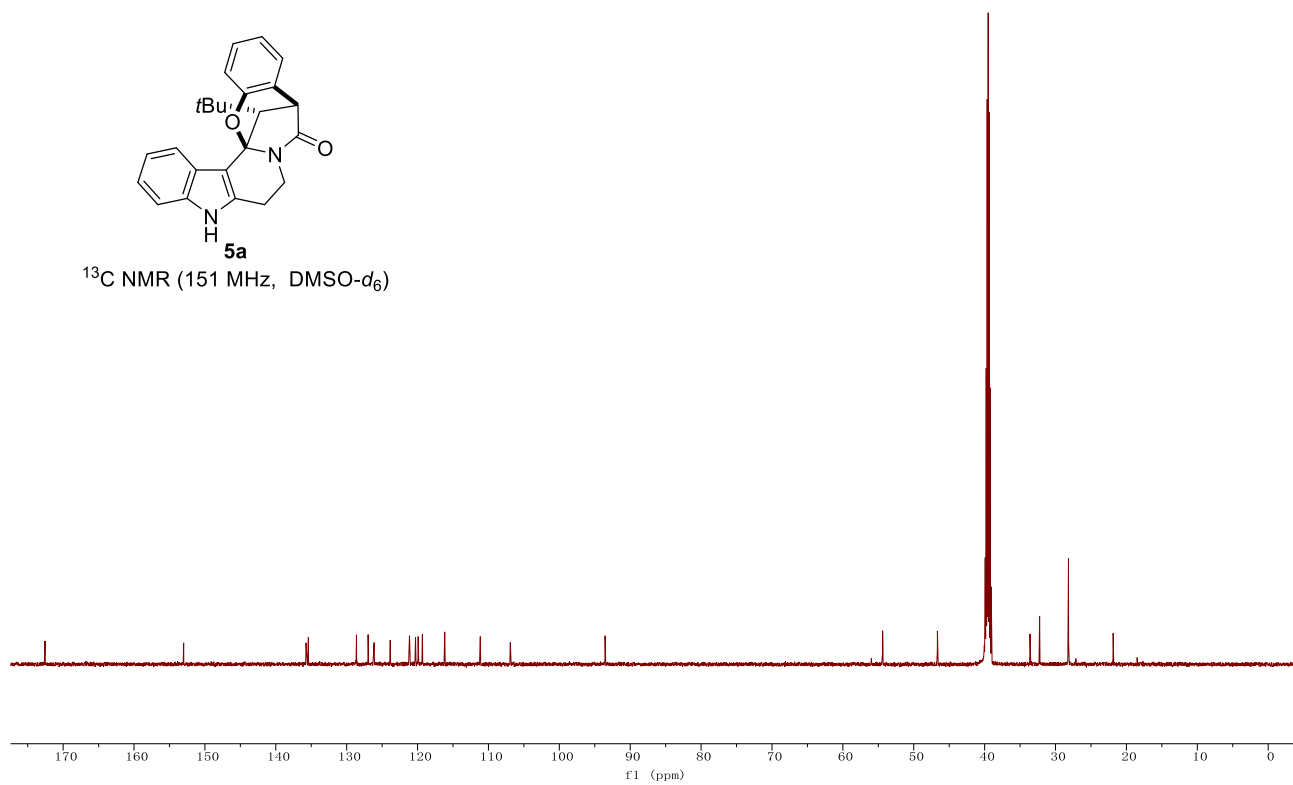

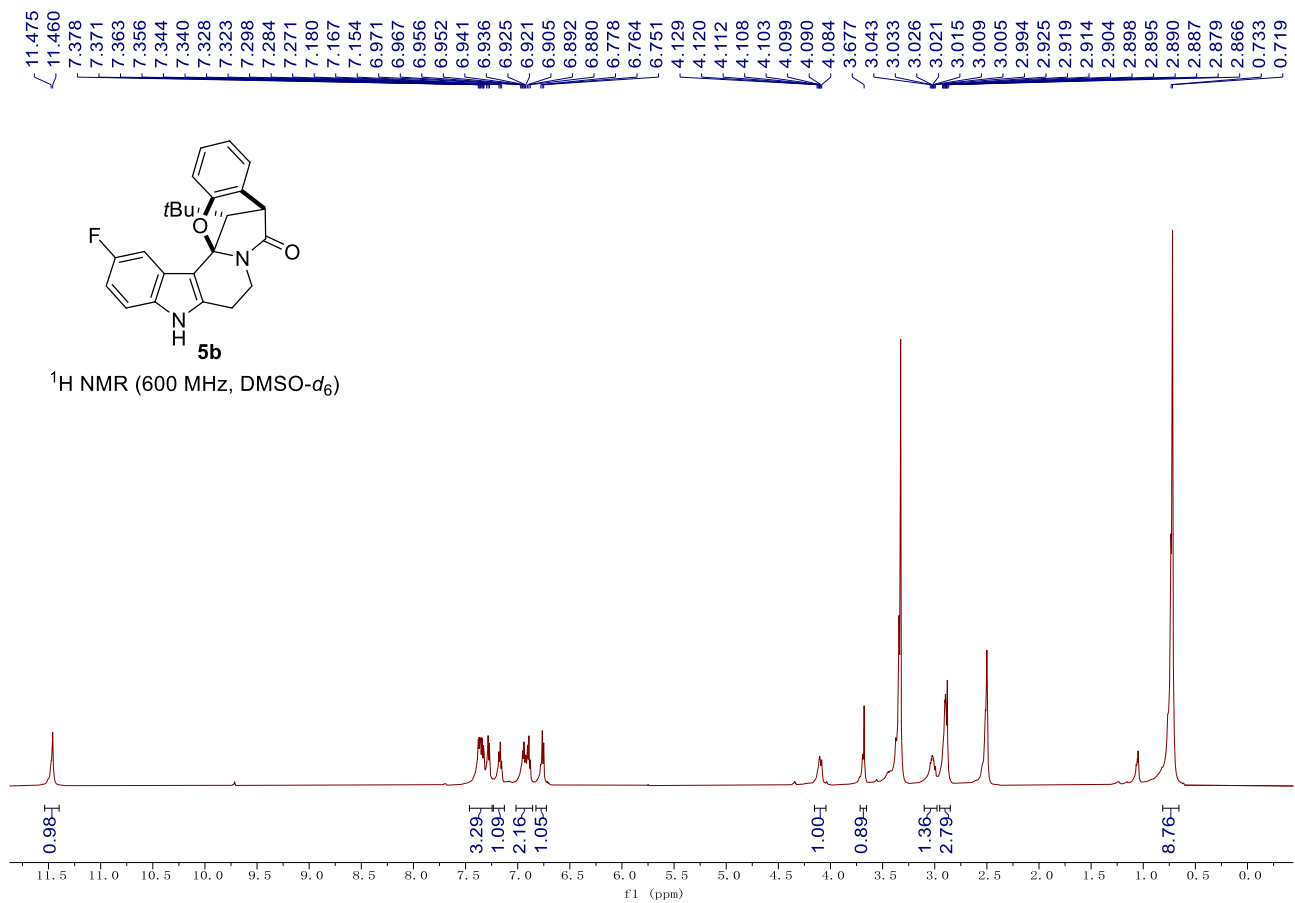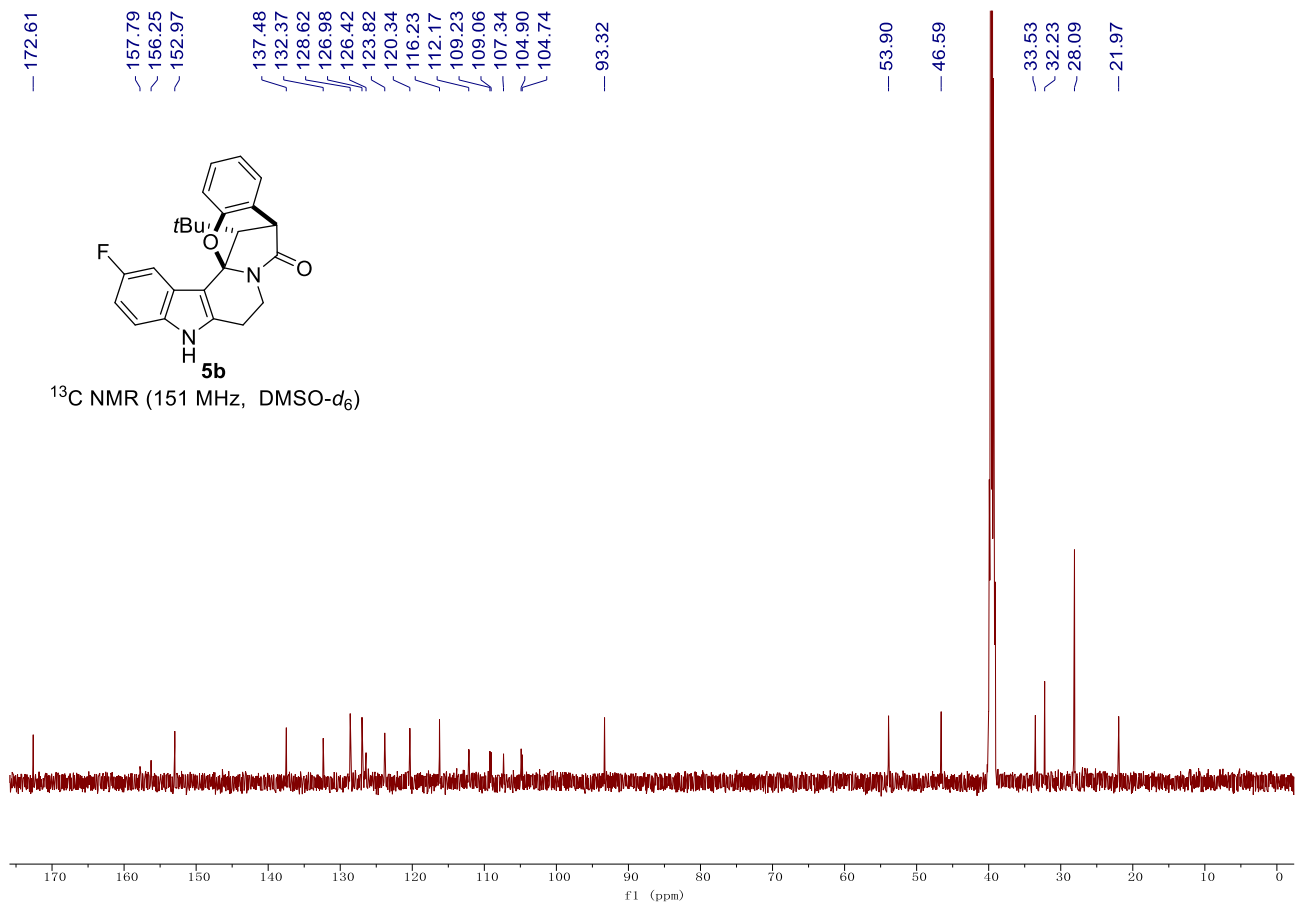

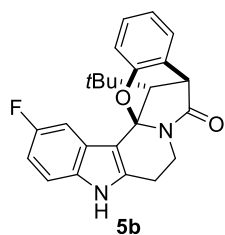

<sup>19</sup>F NMR (565 MHz, DMSO-*d*<sub>6</sub>)

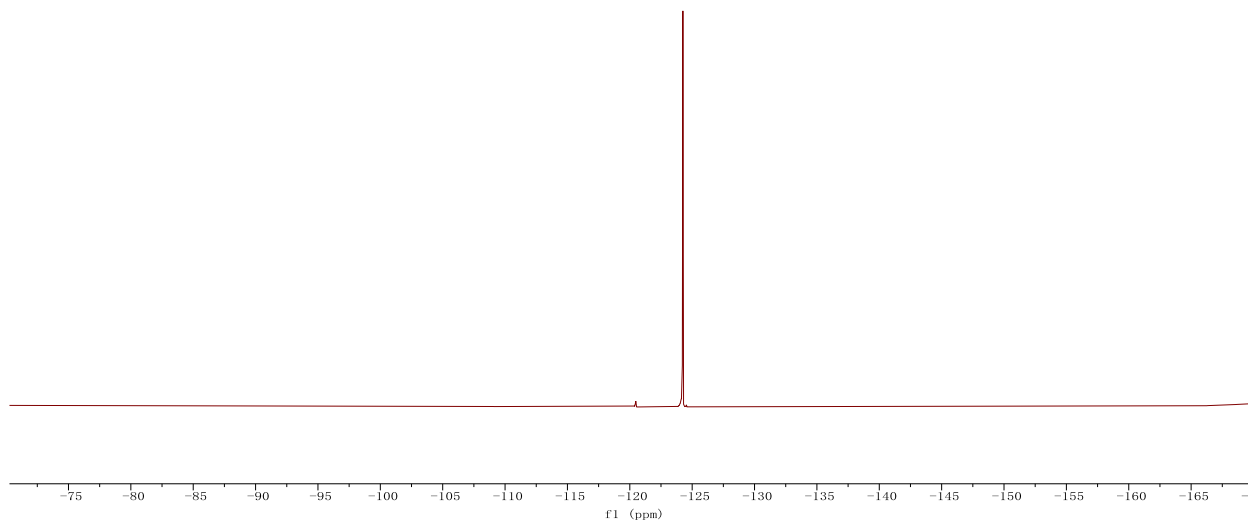



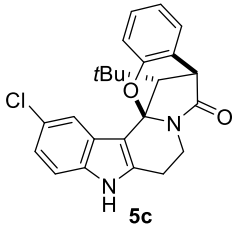

$^1\text{H NMR}$  (600 MHz,  $\text{DMSO-}d_6$ )

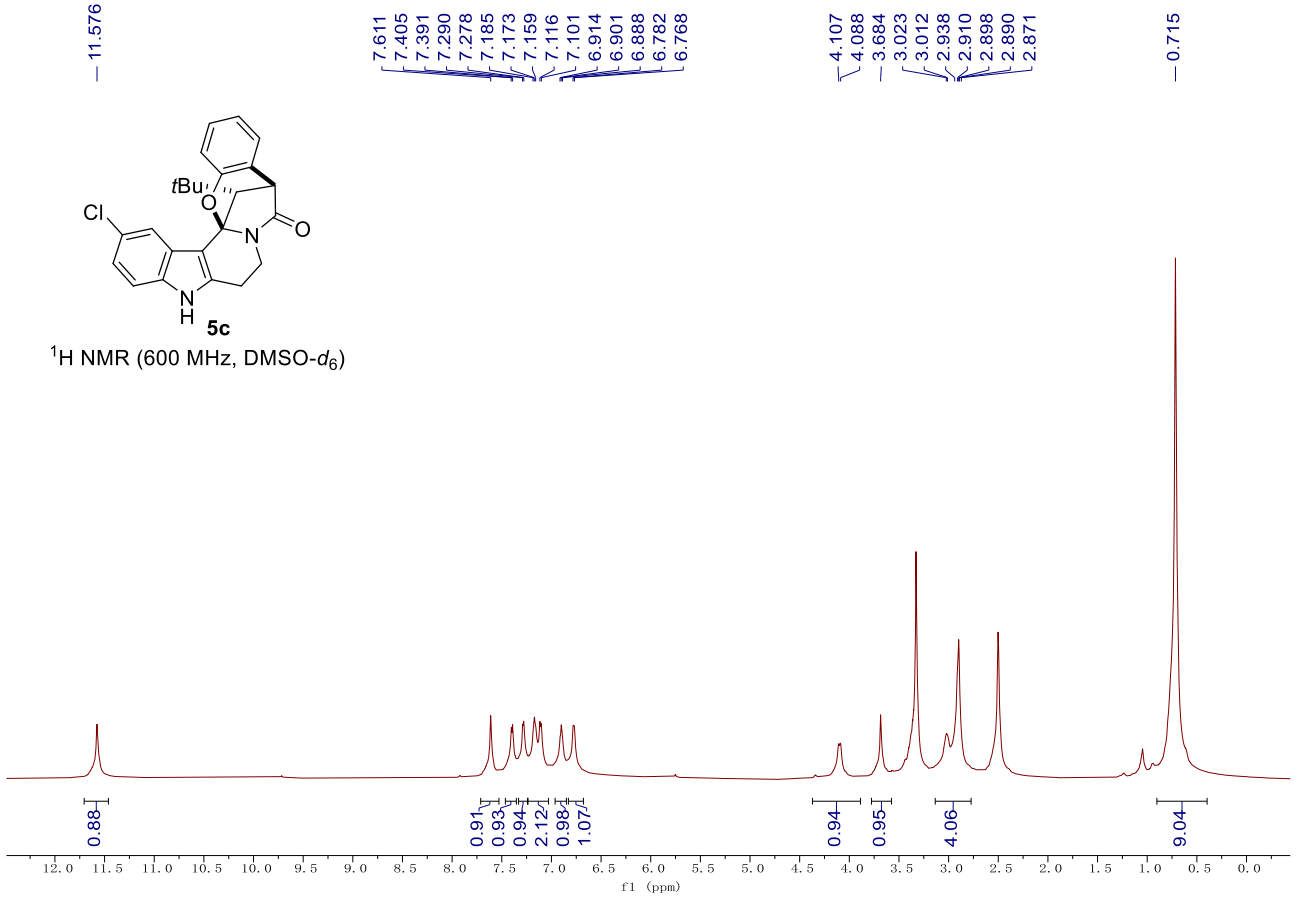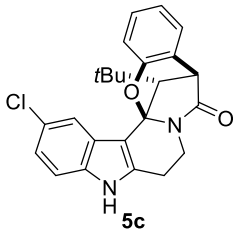

$^{13}\text{C NMR}$  (151 MHz,  $\text{DMSO-}d_6$ )

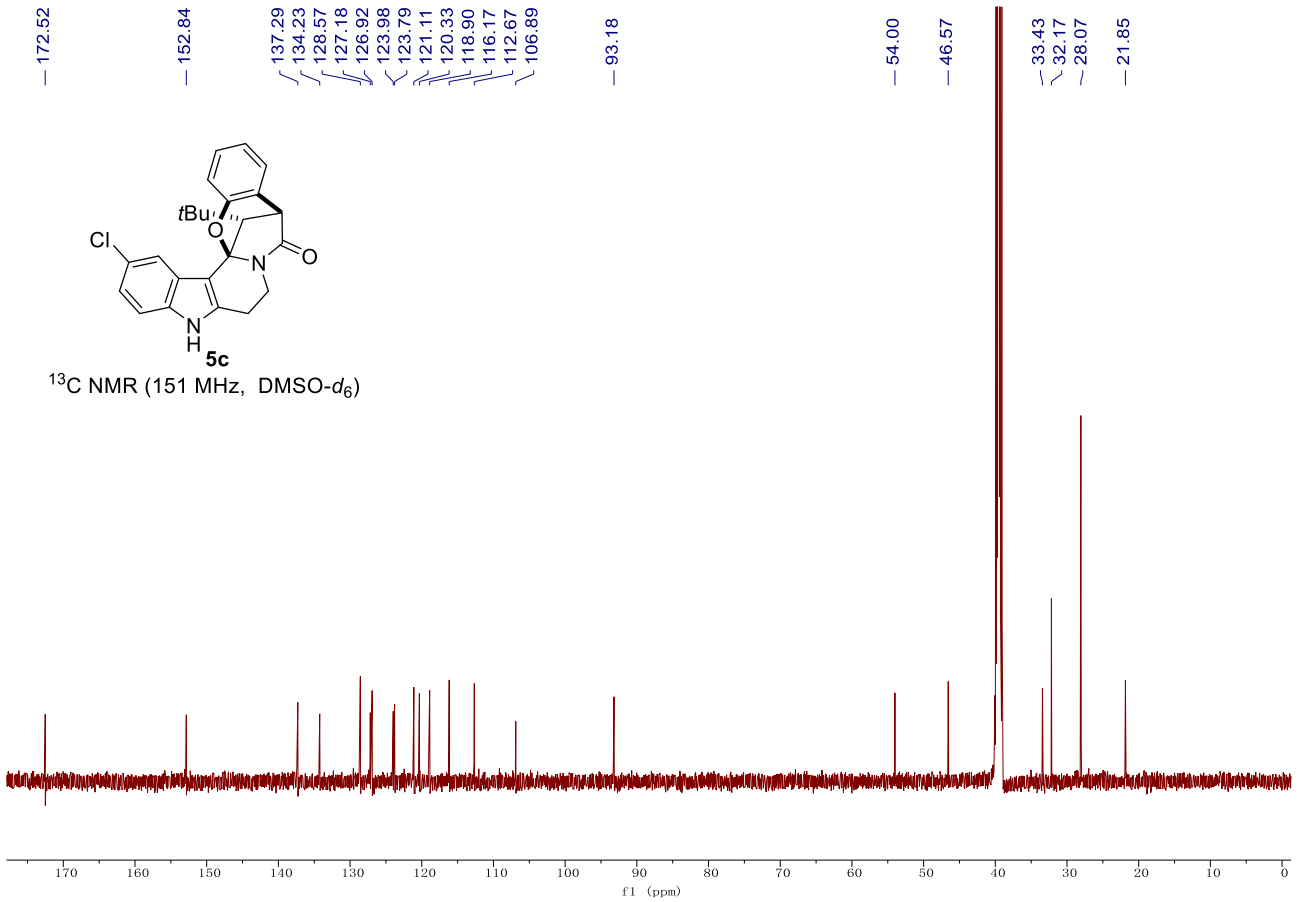

— 11.588

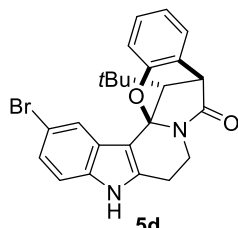

$^1\text{H}$  NMR (600 MHz,  $\text{DMSO-}d_6$ )

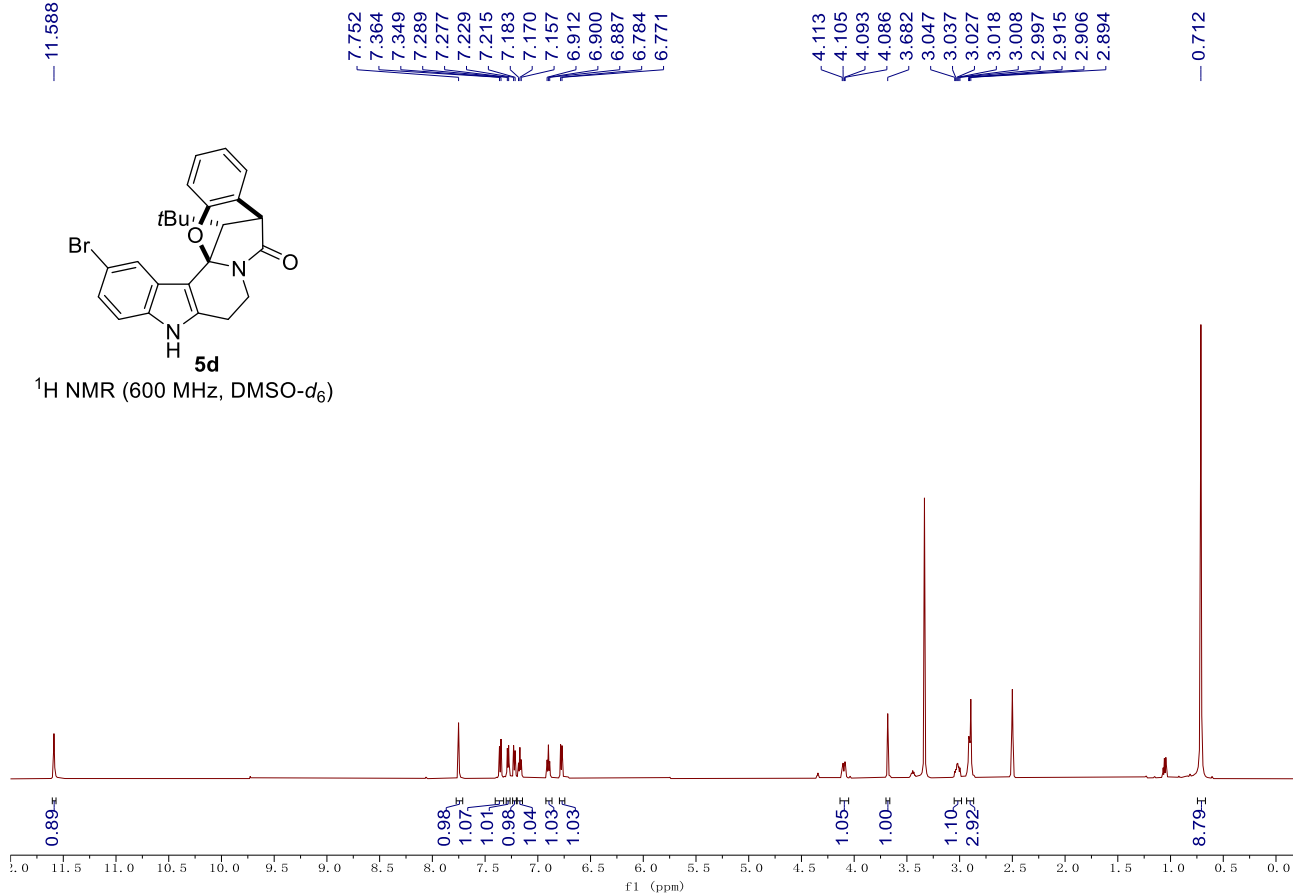

— 172.59

— 152.88

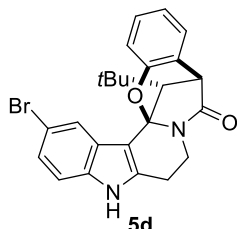

$^{13}\text{C}$  NMR (151 MHz,  $\text{DMSO-}d_6$ )

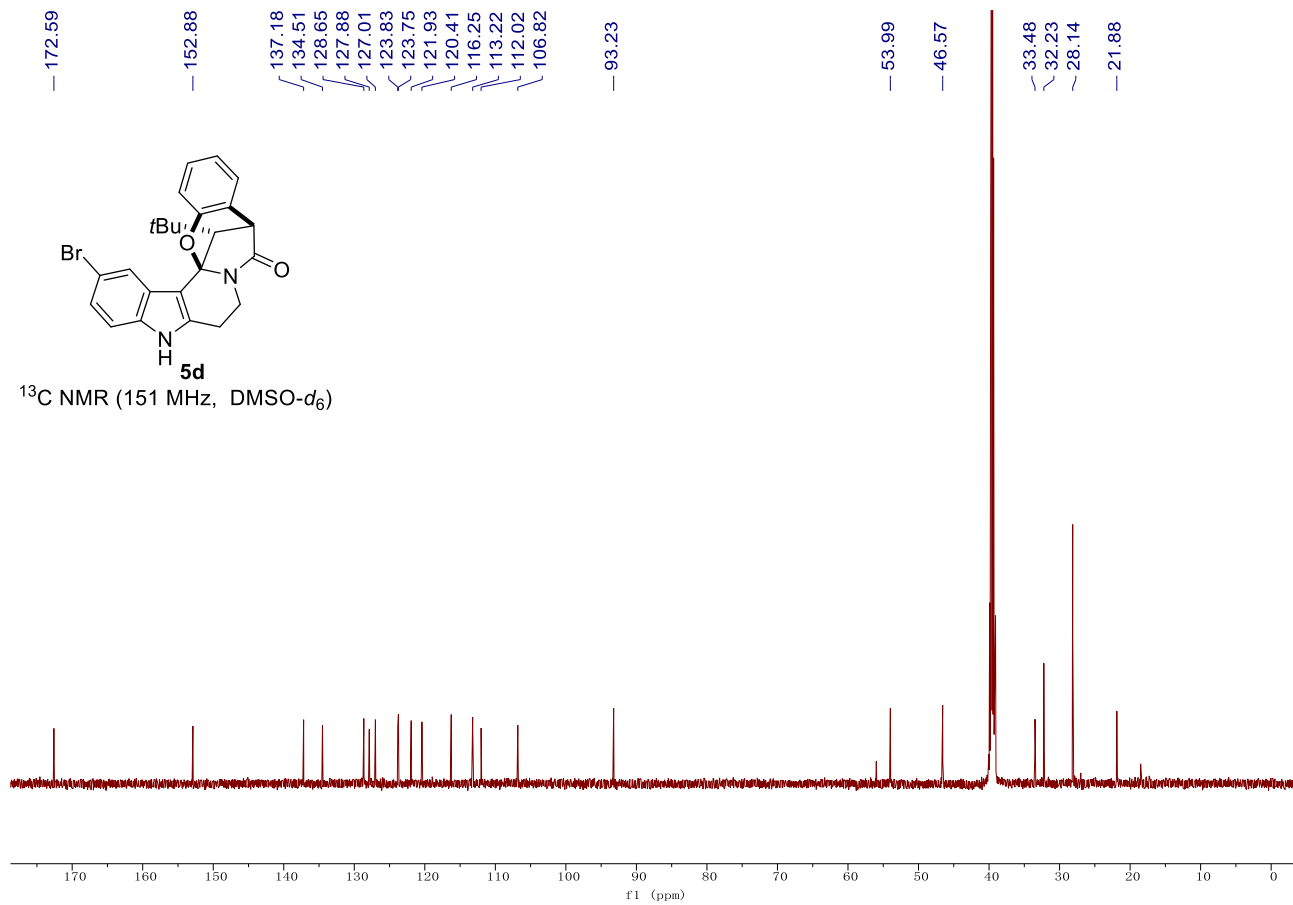

— 11.195

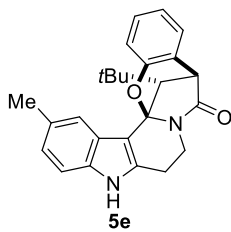

<sup>1</sup>H NMR (400 MHz, DMSO-*d*<sub>6</sub>)

7.357, 7.295, 7.290, 7.276, 7.272, 7.265, 7.244, 7.191, 7.187, 7.172, 7.167, 7.148, 6.930, 6.911, 6.893, 6.874, 6.768, 6.748, 4.113, 4.107, 4.100, 4.086, 4.076, 4.068, 3.680, 3.060, 3.045, 3.036, 3.030, 3.019, 3.007, 2.987, 2.890, 2.882, 2.867, 2.855, 2.790, 2.364, 0.721

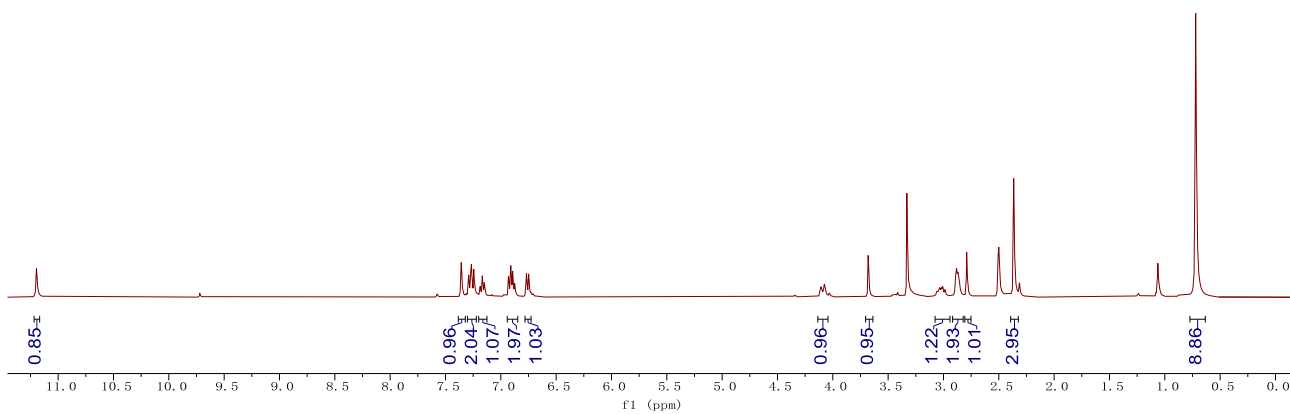

— 172.52

— 153.03

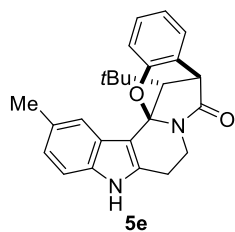

<sup>13</sup>C NMR (101 MHz, DMSO-*d*<sub>6</sub>)

135.30, 134.04, 128.59, 127.76, 126.94, 126.37, 123.86, 122.65, 120.25, 119.61, 116.21, 110.81, 106.44, 93.61, 54.33, 46.65, 33.58, 32.25, 28.20, 21.88, 21.20

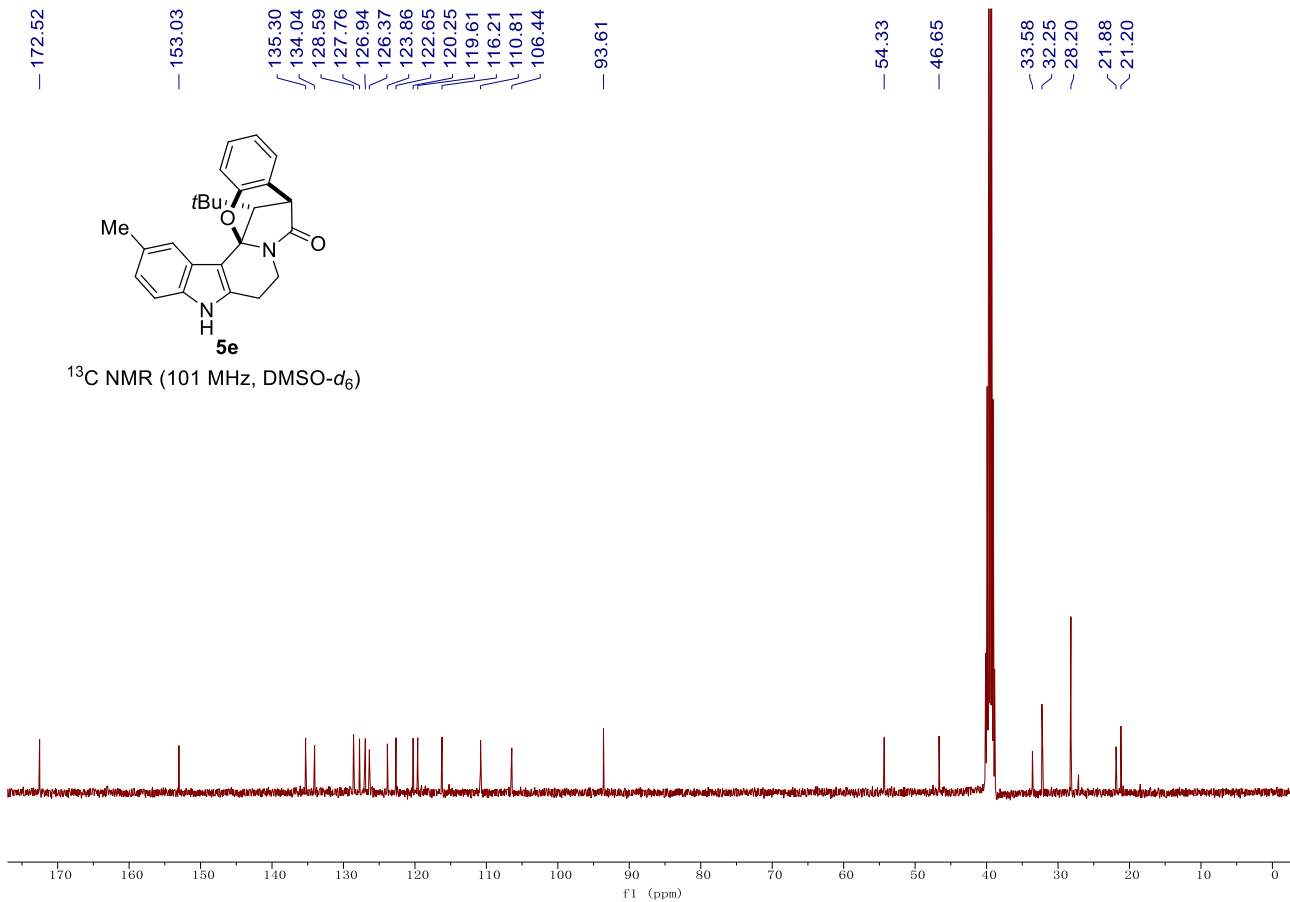

11.538  
7.599  
7.578  
7.446  
7.441  
7.302  
7.297  
7.283  
7.279  
7.191  
7.187  
7.172  
7.168  
7.153  
7.148  
7.075  
7.071  
7.054  
7.049  
6.920  
6.917  
6.902  
6.899  
6.883  
6.880  
6.765  
6.762  
6.744  
6.741

4.135  
4.130  
4.122  
4.117  
4.103  
4.097  
4.091  
4.085  
3.700  
3.077  
3.064  
3.050  
3.045  
3.036  
3.030  
3.019  
3.004  
2.947  
2.942  
2.922  
2.916  
2.909  
2.903  
2.895  
2.882  
2.869  
2.823  
0.711

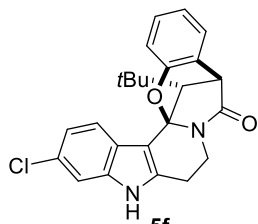

$^1\text{H NMR}$  (400 MHz,  $\text{DMSO-}d_6$ )

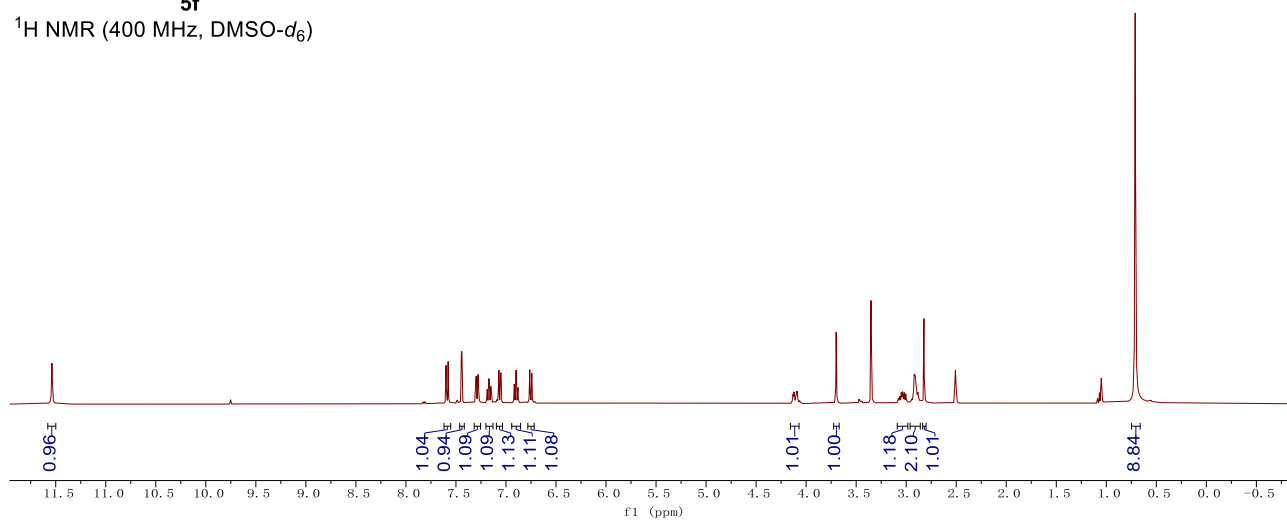

172.52  
152.85  
136.68  
136.20  
128.62  
126.97  
125.82  
124.91  
123.79  
121.13  
120.37  
119.68  
116.18  
110.88  
107.23  
93.20  
54.29  
46.59  
33.49  
32.21  
28.13  
21.84

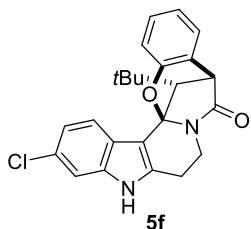

$^{13}\text{C NMR}$  (151 MHz,  $\text{DMSO-}d_6$ )

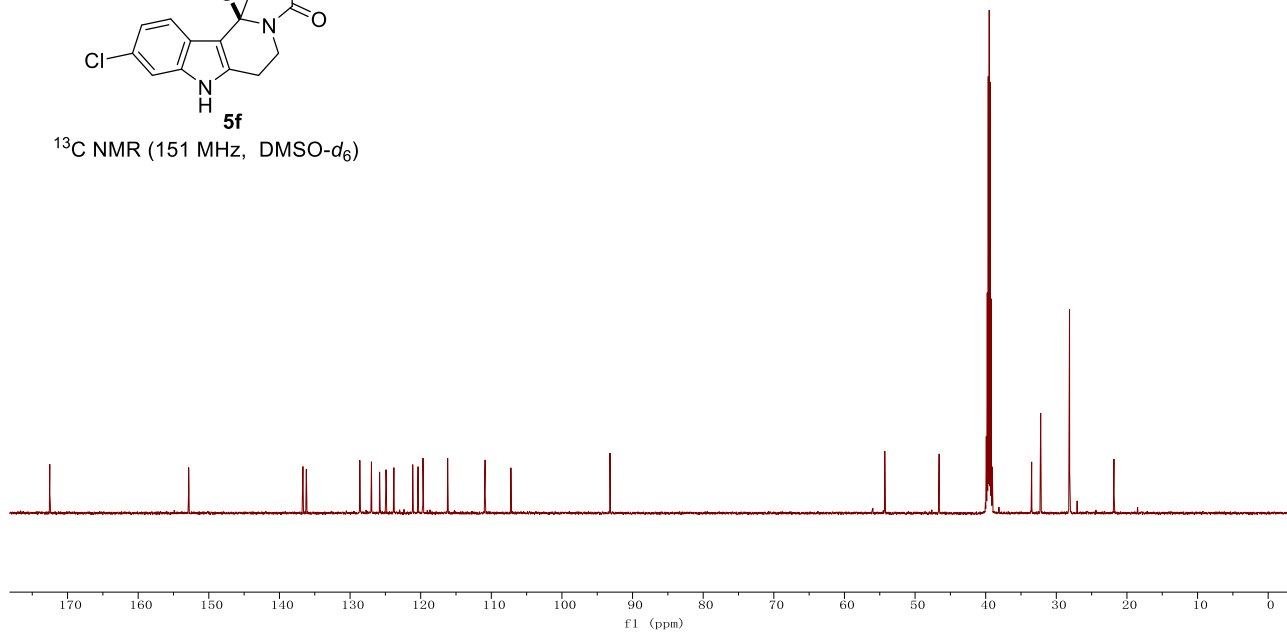

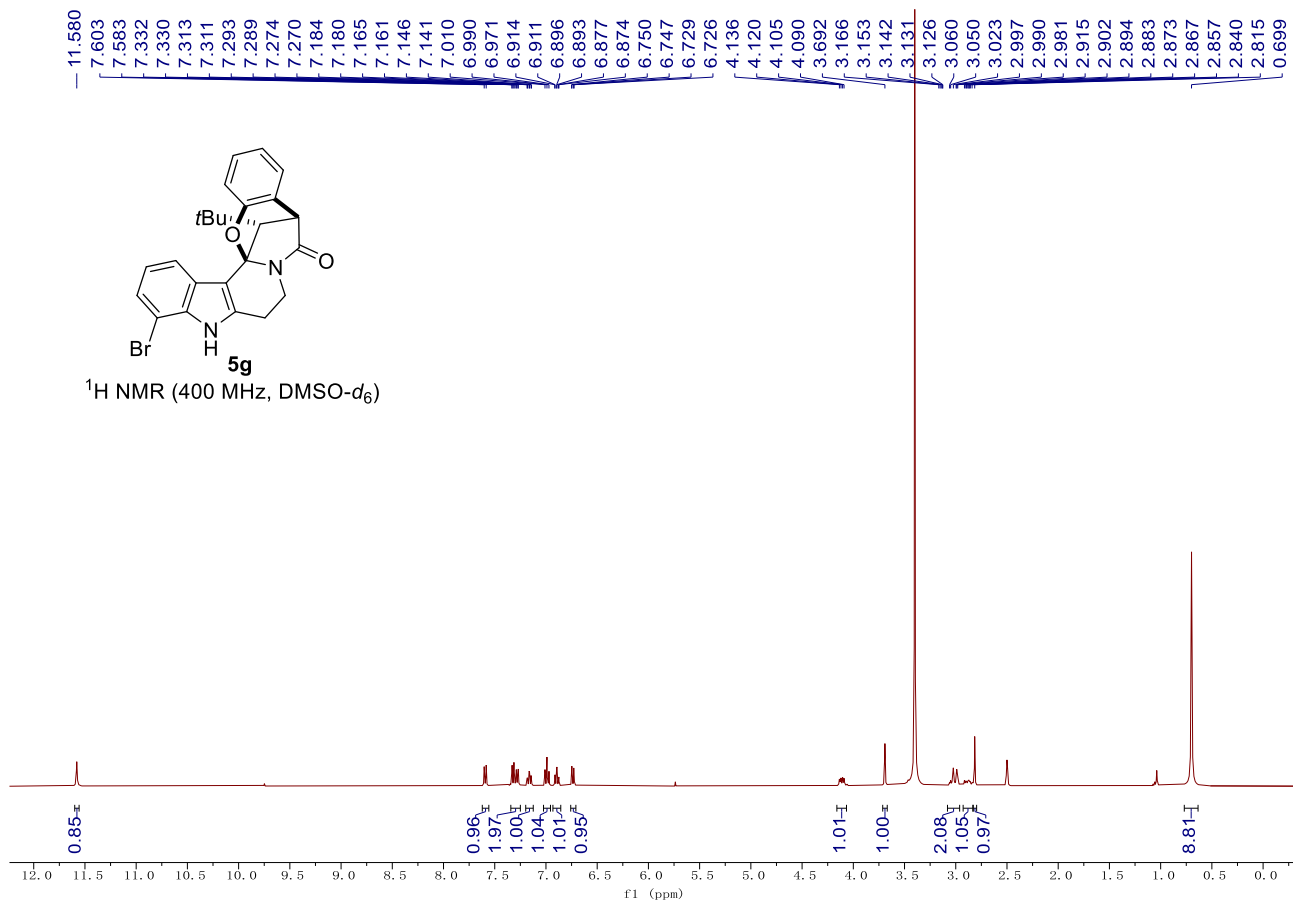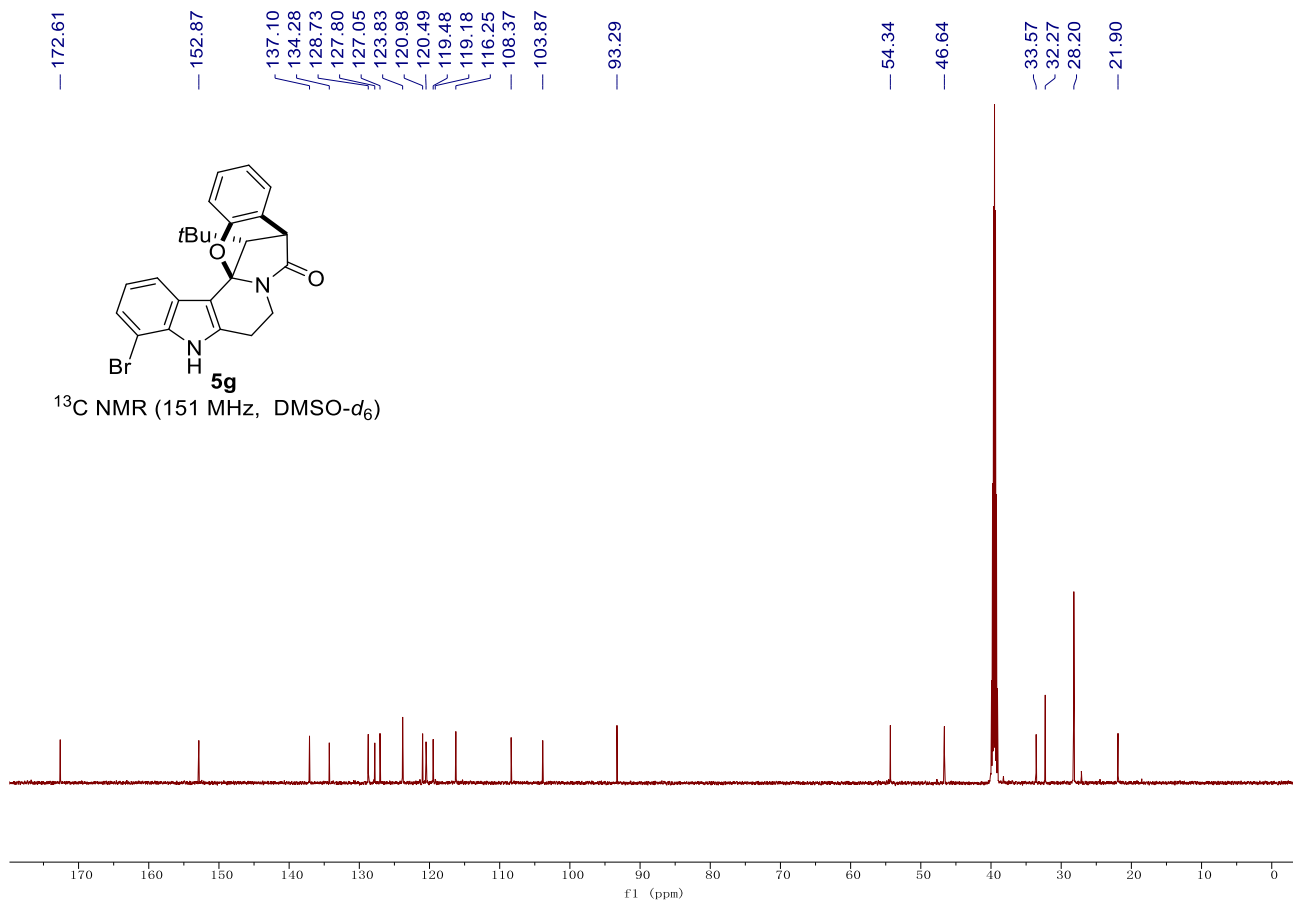

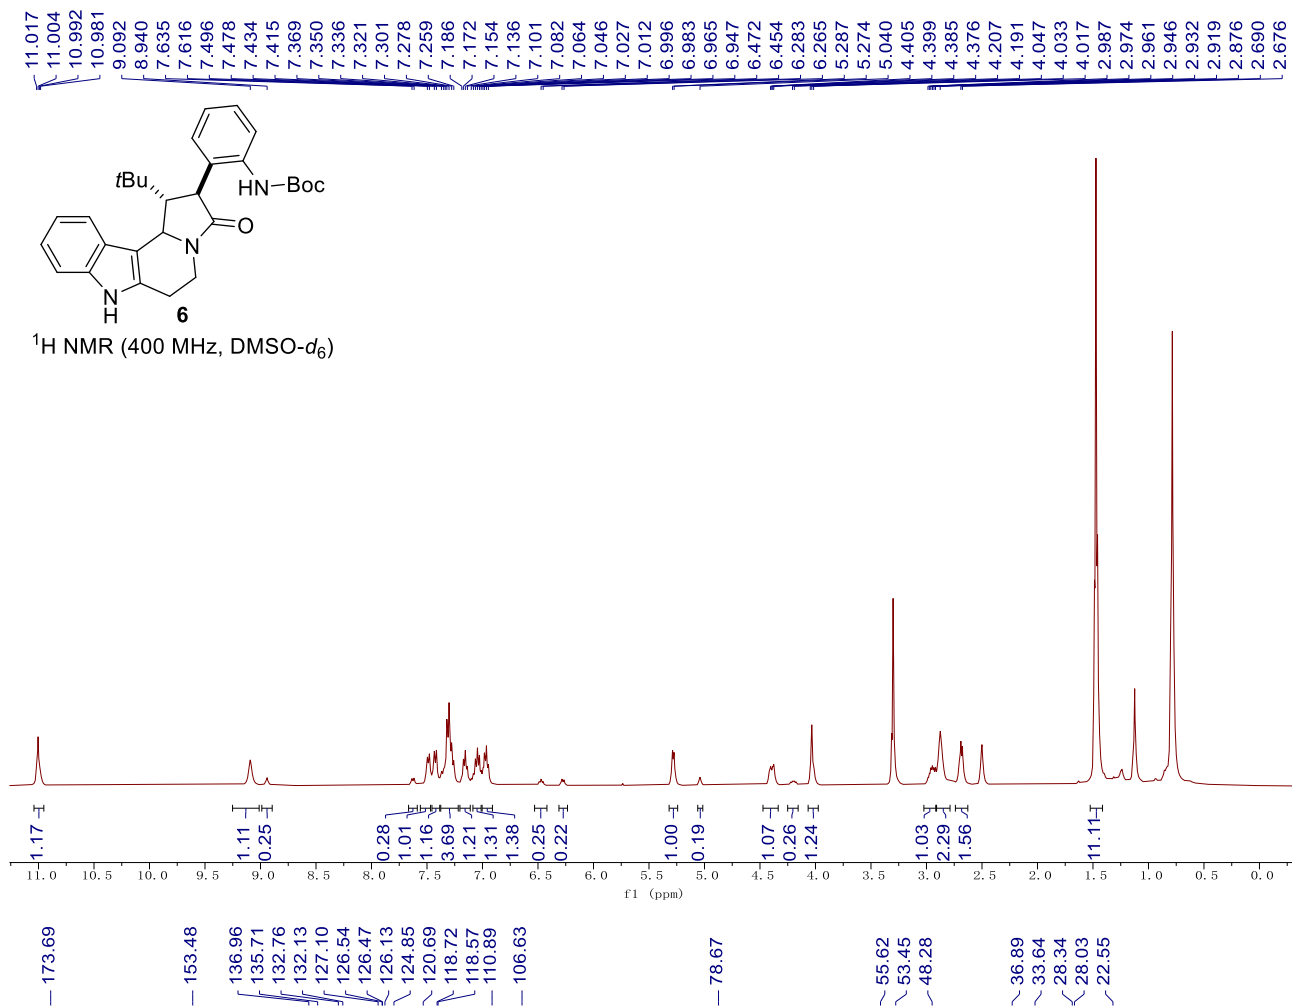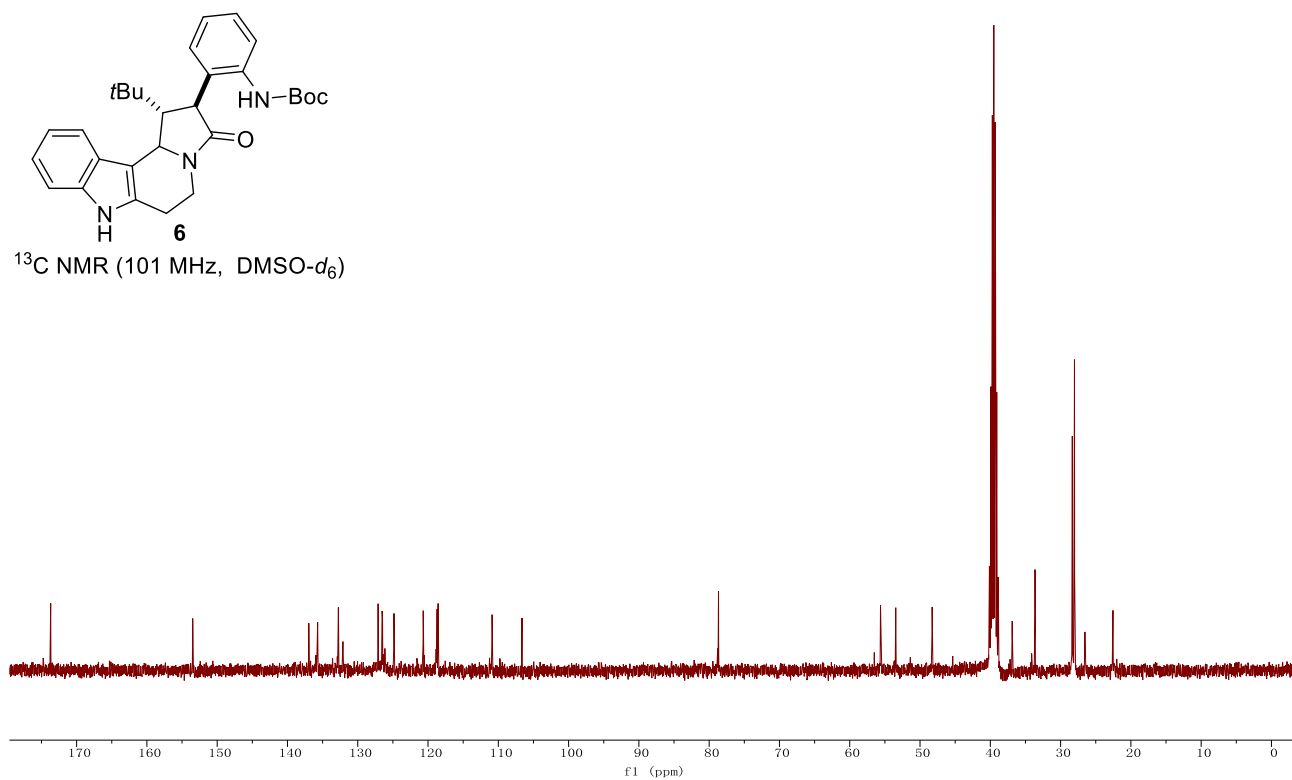

Supplement: d4qo01369g1.pdf [file d4qo01369g1.pdf]
